# Supplementary material for: Enantioselective synthesis of spiro[indoline-3,4′-pyrano[2,3-c]pyrazole] derivatives via an organocatalytic asymmetric Michael/cyclization cascade reaction
Source: Royal Society of Chemistry journal article supplement (doi:10.1039/c6ob01256f), 2016-01-01
Supplement: c6ob01256f1.pdf [file c6ob01256f1.pdf]

# Supporting Information

## Enantioselective synthesis of spiro[indoline-3,4'-pyrano[2,3-c]pyrazole] derivatives via organocatalytic asymmetric Michael/cyclization cascade reaction

Jin Xie,<sup>a</sup> Xiao-Yu Xing,<sup>a</sup> Feng Sha,<sup>\*,a</sup> Zhi-Yan Wu<sup>b</sup>, Xin-Yan Wu<sup>\*, a</sup>

<sup>a</sup> *Key Laboratory for Advanced Materials and Institute of Fine Chemicals, School of Chemistry & Molecular Engineering, East China University of Science and Technology, Shanghai 200237, P. R. China*

<sup>b</sup> *Quanzhou High School, Guilin, Guangxi 541500*

E-mail: [xinyanwu@ecust.edu.cn](mailto:xinyanwu@ecust.edu.cn)

### Table of Contents

|                                                                 |     |
|-----------------------------------------------------------------|-----|
| 1. General Information .....                                    | S2  |
| 2. Synthesis of Isatylidene Malononitriles <b>2e-2p</b> .....   | S2  |
| 3. References .....                                             | S6  |
| 4. Copies of NMR Spectra of the Products <b>3</b> .....         | S7  |
| 5. Copies of NMR Spectra of Substrates <b>2e-2p</b> .....       | S29 |
| 6. Copies of NMR Spectra of Compounds <b>4-6</b> .....          | S41 |
| 7. Copies of HPLC Spectra of the Products <b>3-6</b> .....      | S43 |
| 8. X-ray Structure and Crystal Data for Compound <b>4</b> ..... | S71 |

## 1. General Information

Melting points were taken without correction.  $^1\text{H}$  NMR and  $^{13}\text{C}$  NMR spectra were recorded on Bruker 300 spectrometer or Bruker 400 spectrometer.  $^1\text{H}$  NMR spectra were referenced to tetramethylsilane ( $\delta$  0.00 ppm) using  $\text{CDCl}_3$  as solvent or referenced to solvent protons ( $\delta$  2.50 ppm) using  $\text{DMSO-}d_6$  as solvent.  $^{13}\text{C}$  NMR spectra were referenced to solvent carbons ( $\delta$  77.0 ppm for  $\text{CDCl}_3$  or  $\delta$  39.52 ppm for  $\text{DMSO-}d_6$ ). IR spectra were recorded on Nicolet Magna-I 550 spectrometer. High resolution mass spectra (HRMS) were performed on an electron spray ionization time-of-flight (ESI-TOF) mass spectrometer. Thin-layer chromatography (TLC) was performed on 10-40  $\mu\text{m}$  silica gel plates. Column chromatography was performed, using silica gel (300-400 mesh) eluted with ethyl acetate and  $\text{CH}_2\text{Cl}_2$ .

Pyrazolones **1a-1e**<sup>1</sup> and isatyliidene malononitriles **2a-2d**, **2q-2s**<sup>2</sup> were prepared according to literature procedures.

## 2. Synthesis of Isatyliidene Malononitriles 2e-2p

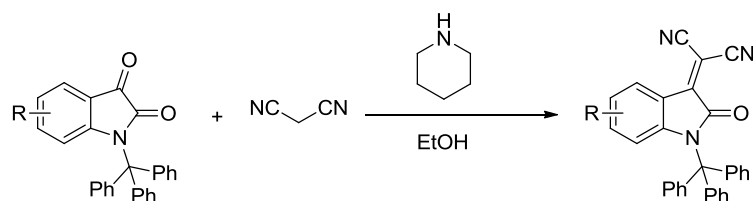

To a solution of the *N*-substituted isatins (5.0 mmol) in anhydrous ethanol (10 mL) malonodinitrile was added, as well as one drop piperidine as catalyst. The resulting mixture was stirred until the reaction completed (monitored by TLC). The solvent was removed under reduced pressure and the residue was purified by column chromatography ( $\text{CH}_2\text{Cl}_2$ ) to give the desired product **2**.

### 2-(2-oxo-1-tritylindolin-3-ylidene)malononitrile (2e)

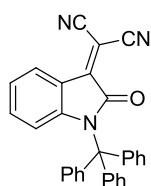

Red solid, mp: 236.2-239.1  $^{\circ}\text{C}$ ,  $^1\text{H}$  NMR ( $\text{DMSO-}d_6$ , 400 MHz):  $\delta$  7.98 (d,  $J = 7.6$  Hz, 1H), 7.48 (d,  $J = 7.6$  Hz, 6H), 7.31 (t,  $J = 7.6$  Hz, 7H), 7.28-7.19 (m, 3H), 7.13 (t,  $J = 7.6$  Hz, 1H), 6.29 (d,  $J = 8.4$  Hz, 1H);  $^{13}\text{C}$  NMR ( $\text{DMSO-}d_6$ , 100 MHz):  $\delta$  163.4, 149.9, 146.4, 141.1, 135.9, 128.8, 127.9, 127.1, 125.2,

123.3, 119.3, 116.5, 113.1, 111.9, 80.6, 74.4; IR (KBr, cm<sup>-1</sup>):  $\nu$  3421, 3036, 2225, 1719, 1593, 1579, 1490, 1461, 1448, 1340, 1311, 1279, 1209, 1188, 1210, 1186, 1111, 1033, 1002, 794, 773, 764, 744, 722, 706, 697, 644; HRMS (ESI) calcd for C<sub>30</sub>H<sub>19</sub>KN<sub>3</sub>O ([M+K]<sup>+</sup>): 476.1165, found: 476.1163.

### 2-(4-chloro-2-oxo-1-tritylindolin-3-ylidene)malononitrile (2f)

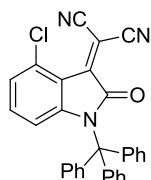

Red solid, mp: 219.2-223.1 °C, <sup>1</sup>H NMR (CDCl<sub>3</sub>, 300 MHz):  $\delta$  7.41 (d,  $J$  = 6.6 Hz, 6H), 7.31-7.23 (m, 9H), 7.09 (t,  $J$  = 8.4 Hz, 1H), 6.97 (d,  $J$  = 8.1 Hz, 1H), 6.32 (d,  $J$  = 8.1 Hz, 1H); <sup>13</sup>C NMR (CDCl<sub>3</sub>, 75 MHz):  $\delta$  164.4, 148.2, 147.8, 140.5, 135.8, 134.2, 128.9, 128.1, 127.5, 125.3, 117.7, 115.0, 113.2, 112.2, 85.7, 75.7; IR (KBr, cm<sup>-1</sup>):  $\nu$  3420, 2959, 2927, 2852, 1733, 1584, 1455, 1428, 1332, 1279, 1256, 1226, 1184, 1146, 1084, 1023, 760, 749, 704; HRMS (ESI) calcd for C<sub>30</sub>H<sub>18</sub>ClNaN<sub>3</sub>O ([M+Na]<sup>+</sup>): 494.1036, found: 494.1034.

### 2-(4-bromo-2-oxo-1-tritylindolin-3-ylidene)malononitrile (2g)

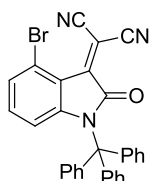

Red solid, mp: 217.4-220.3 °C, <sup>1</sup>H NMR (CDCl<sub>3</sub>, 300 MHz):  $\delta$  7.42 (d,  $J$  = 7.5 Hz, 6H), 7.31-7.16 (m, 10H), 6.99 (t,  $J$  = 8.4 Hz, 1H), 6.37 (d,  $J$  = 8.4 Hz, 1H); <sup>13</sup>C NMR (CDCl<sub>3</sub>, 75 MHz):  $\delta$  164.7, 149.3, 148.5, 140.5, 135.7, 128.8, 128.1, 127.5, 122.2, 119.8, 115.4, 113.1, 111.9, 85.2, 75.7; IR (KBr, cm<sup>-1</sup>):  $\nu$  3421, 2957, 2923, 2849, 2314, 1730, 1635, 1583, 1454, 1428, 1329, 1273, 1263, 1220, 1177, 1138, 1088, 766, 750, 704; HRMS (ESI) calcd for C<sub>30</sub>H<sub>18</sub>BrNaN<sub>3</sub>O ([M+Na]<sup>+</sup>): 538.0531, found: 538.0539.

### 2-(5-methoxy-2-oxo-1-tritylindolin-3-ylidene)malononitrile (2h)

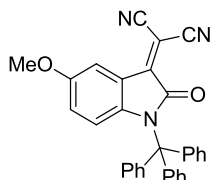

Red solid, mp: 196.9-199.1 °C, <sup>1</sup>H NMR (CDCl<sub>3</sub>, 300 MHz):  $\delta$  7.63 (d,  $J$  = 2.7 Hz, 1H), 7.41 (d,  $J$  = 6.9 Hz, 6H), 7.30-7.17 (m, 9H), 6.74 (dd,  $J_1$  = 9.0 Hz,  $J_2$  = 2.7 Hz, 1H), 6.23 (d,  $J$  = 9.3 Hz, 1H), 3.74 (s, 3H); <sup>13</sup>C NMR (CDCl<sub>3</sub>, 75 MHz):  $\delta$  163.4, 155.5, 150.0, 141.4, 140.8, 129.0, 128.0, 127.3, 123.4, 119.6, 117.9, 112.7, 111.1, 109.3, 81.3, 75.3, 55.6; IR (KBr, cm<sup>-1</sup>):  $\nu$  3434, 2957, 2927, 2850, 2228, 1727, 1581, 1484, 1449, 1308, 1274, 1265, 1230, 1193, 1164, 1121, 1089, 1035, 902, 873, 851, 821, 800, 764, 748, 727, 704; HRMS (ESI) calcd for C<sub>31</sub>H<sub>21</sub>NaN<sub>3</sub>O<sub>2</sub> ([M+Na]<sup>+</sup>): 490.1531, found: 490.1531.

### 2-(5-methyl-2-oxo-1-tritylindolin-3-ylidene)malononitrile (2i)

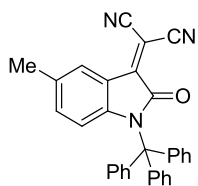

Red solid, mp: 226.7-228.4 °C,  $^1\text{H}$  NMR ( $\text{CDCl}_3$ , 300 MHz):  $\delta$  7.90 (s, 1H), 7.41 (d,  $J = 7.8$  Hz, 6H), 7.28-7.23 (m, 9H), 6.97 (d,  $J = 8.4$  Hz, 1H), 6.21 (d,  $J = 8.4$  Hz, 1H), 3.24 (s, 3H);  $^{13}\text{C}$  NMR ( $\text{CDCl}_3$ , 75 MHz):  $\delta$  163.4, 149.8, 145.1, 140.8, 137.1, 133.2, 128.9, 127.9, 127.3, 126.0, 119.0, 116.7, 112.7, 111.2, 80.8, 75.2, 20.6; IR (KBr,  $\text{cm}^{-1}$ ):  $\nu$  3422, 2958, 2924, 2227, 1725, 1616, 1579, 1482, 1451, 1314, 1270, 1242, 1196, 1160, 1129, 1087, 1036, 1003, 903, 822, 795, 726, 704; HRMS (ESI) calcd for  $\text{C}_{31}\text{H}_{21}\text{NaN}_3\text{O}$  ( $[\text{M}+\text{Na}]^+$ ): 474.1582, found: 474.1578.

### 2-(5-fluoro-2-oxo-1-tritylindolin-3-ylidene)malononitrile (2j)

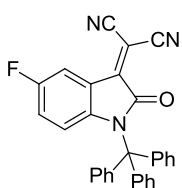

Red solid, mp: 224.2-228.2 °C,  $^1\text{H}$  NMR ( $\text{CDCl}_3$ , 400 MHz):  $\delta$  7.83 (dd,  $J_1 = 7.6$  Hz,  $J_2 = 2.4$  Hz, 1H), 7.41-7.38 (m, 6H), 7.31-7.21 (m, 9H), 6.89 (dt,  $J_1 = 8.8$  Hz,  $J_2 = 2.8$  Hz, 1H), 6.30 (dd,  $J_1 = 9.2$  Hz,  $J_2 = 4.0$  Hz, 1H);  $^{13}\text{C}$  NMR ( $\text{CDCl}_3$ , 75 MHz):  $\delta$  163.0, 159.9, 156.6, 149.1, 143.5, 140.5, 128.9, 128.1, 127.5, 123.0 (d,  $J_{\text{C-F}} = 23.3$  Hz), 119.6 (d,  $J_{\text{C-F}} = 8.6$  Hz), 118.1 (d,  $J_{\text{C-F}} = 7.4$  Hz), 112.5 (d,  $J_{\text{C-F}} = 25.1$  Hz), 111.4 (d,  $J_{\text{C-F}} = 107.8$  Hz), 82.9, 75.6; IR (KBr,  $\text{cm}^{-1}$ ):  $\nu$  3447, 2227, 1729, 1587, 1480, 1451, 1316, 1301, 1268, 1223, 1185, 1167, 1155, 1114, 1084, 1036, 1006, 980, 903, 872, 823, 810, 743, 726, 704; HRMS (ESI) calcd for  $\text{C}_{30}\text{H}_{18}\text{FNaN}_3\text{O}$  ( $[\text{M}+\text{Na}]^+$ ): 478.1332, found: 478.1332.

### 2-(5-chloro-2-oxo-1-tritylindolin-3-ylidene)malononitrile (2k)

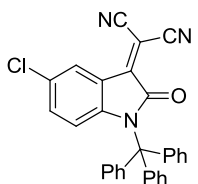

Red solid, mp: 210.3-212.6 °C,  $^1\text{H}$  NMR ( $\text{CDCl}_3$ , 300 MHz):  $\delta$  8.07 (s, 1H), 7.39 (d,  $J = 7.2$  Hz, 6H), 7.27 (d,  $J = 7.5$  Hz, 9H), 7.13 (d,  $J = 8.7$  Hz, 1H), 6.29 (d,  $J = 9.3$  Hz, 1H);  $^{13}\text{C}$  NMR ( $\text{CDCl}_3$ , 75 MHz):  $\delta$  162.8, 148.5, 145.6, 140.4, 135.7, 128.9, 128.1, 127.5, 125.3, 120.0, 118.0, 112.1, 110.6, 82.9, 75.6; IR (KBr,  $\text{cm}^{-1}$ ):  $\nu$  3427, 2957, 2928, 2853, 2320, 1726, 1598, 1457, 1304, 1267, 1182, 1125, 1088, 1052, 957, 903, 878, 821, 766, 745, 726, 704; HRMS (ESI) calcd for  $\text{C}_{30}\text{H}_{18}\text{ClNaN}_3\text{O}$  ( $[\text{M}+\text{Na}]^+$ ): 494.1036, found: 494.1033.

### 2-(5-bromo-2-oxo-1-tritylindolin-3-ylidene)malononitrile (2l)

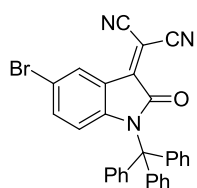

Red solid, mp: 225.4-227.8 °C,  $^1\text{H}$  NMR ( $\text{CDCl}_3$ , 300 MHz):  $\delta$  8.21 (s, 1H), 7.39 (d,  $J = 6.9$  Hz, 6H), 7.31-7.24 (m, 10H), 6.23 (d,  $J = 9.0$  Hz, 1H);  $^{13}\text{C}$  NMR ( $\text{CDCl}_3$ , 75 MHz):  $\delta$  162.7, 148.3, 146.1, 140.4, 138.5, 128.9, 128.2, 128.1, 127.6, 120.4, 118.3, 116.4, 112.1, 110.6, 82.9, 75.6; IR (KBr,  $\text{cm}^{-1}$ ):  $\nu$  3423, 2958, 2926, 2850, 2222, 1723, 1592, 1463, 1302, 1267, 1186, 1127, 1080, 1033,

951, 902, 881, 819, 766, 747, 724, 701; HRMS (ESI) calcd for  $C_{30}H_{18}BrNaN_3O$  ( $[M+Na]^+$ ): 538.0531, found: 538.0529.

### 2-(6-methyl-2-oxo-1-tritylindolin-3-ylidene)malononitrile (2m)

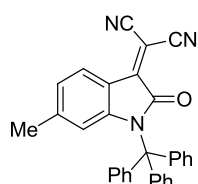

Red solid, mp: 239.5-242.1 °C,  $^1H$  NMR ( $CDCl_3$ , 300 MHz):  $\delta$  7.99 (d,  $J = 8.1$  Hz, 1H), 7.41 (d,  $J = 7.2$  Hz, 6H), 7.31-7.23 (m, 9H), 6.82 (d,  $J = 7.8$  Hz, 1H), 6.03 (s, 1H), 2.11 (s, 3H);  $^{13}C$  NMR ( $CDCl_3$ , 75 MHz):  $\delta$  163.7, 149.3, 148.6, 147.6, 140.9, 129.0, 127.9, 127.3, 125.9, 124.3, 117.6, 116.8, 112.9, 111.3, 79.6, 75.3, 23.2; IR (KBr,  $cm^{-1}$ ):  $\nu$  3421, 2954, 2925, 2848, 2320, 1725, 1613, 1589, 1448, 1346, 1273, 1260, 1192, 1124, 1090, 900, 817, 764, 749, 723, 701; HRMS (ESI) calcd for  $C_{31}H_{21}NaN_3O$  ( $[M+Na]^+$ ): 474.1582, found: 474.1581.

### 2-(6-chloro-2-oxo-1-tritylindolin-3-ylidene)malononitrile (2n)

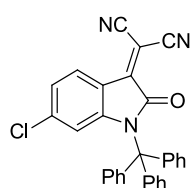

Red solid, mp: 258.1-258.5 °C,  $^1H$  NMR ( $DMSO-d_6$ , 400 MHz):  $\delta$  7.97 (d,  $J = 8.4$  Hz, 1H), 7.46 (d,  $J = 8.0$  Hz, 6H), 7.35 (t,  $J = 7.6$  Hz, 6H), 7.30-7.26 (m, 4H), 6.08 (d,  $J = 1.6$  Hz, 1H);  $^{13}C$  NMR ( $CDCl_3$ , 75 MHz):  $\delta$  163.2, 148.2, 148.1, 142.6, 140.4, 128.9, 128.2, 127.6, 127.2, 126.6, 123.7, 117.5, 117.3, 112.5, 110.9, 107.6, 75.8; IR (KBr,  $cm^{-1}$ ):  $\nu$  3431, 2956, 2921, 2849, 2223, 1726, 1641, 1631, 1591, 1421, 1344, 1270, 1244, 1190, 1119, 1082, 1051, 980, 956, 936, 906, 819, 794, 768, 747, 726, 698; HRMS (ESI) calcd for  $C_{30}H_{18}ClNaN_3O$  ( $[M+Na]^+$ ): 494.1036, found: 494.1030.

### 2-(6-bromo-2-oxo-1-tritylindolin-3-ylidene)malononitrile (2o)

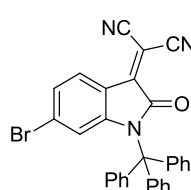

Red solid, mp: 238.4-242.6 °C,  $^1H$  NMR ( $DMSO-d_6$ , 400 MHz):  $\delta$  7.88 (d,  $J = 8.4$  Hz, 1H), 7.45 (d,  $J = 8.0$  Hz, 6H), 7.42-7.39 (m, 1H), 7.35 (t,  $J = 7.6$  Hz, 6H), 7.29 (d,  $J = 7.2$  Hz, 3H), 6.23 (s, 1H);  $^{13}C$  NMR ( $DMSO-d_6$ , 100 MHz):  $\delta$  163.2, 148.8, 147.1, 140.7, 128.8, 128.0, 127.4, 126.4, 126.2, 119.0, 118.6, 113.1, 111.8, 81.2, 74.8; IR (KBr,  $cm^{-1}$ ):  $\nu$  3428, 2960, 2930, 2312, 1726, 1640, 1633, 1590, 1411, 1334, 1270, 1242, 1188, 1160, 1120, 1072, 1012, 922, 902, 864, 819, 797, 725, 698; HRMS (ESI) calcd for  $C_{30}H_{18}BrNaN_3O$  ( $[M+Na]^+$ ): 538.0531, found: 538.0526.

### 2-(7-fluoro-2-oxo-1-tritylindolin-3-ylidene)malononitrile (2p)

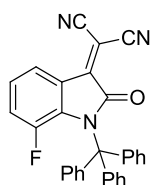

Red solid, mp: 228.9-229.9 °C,  $^1H$  NMR ( $CDCl_3$ , 300 MHz):  $\delta$  8.08 (d,  $J$

= 7.8 Hz, 1H), 7.39-7.36 (m, 6H), 7.28-7.23 (m, 9H), 7.07-6.93 (m, 2H);  $^{13}\text{C}$  NMR ( $\text{CDCl}_3$ , 75 MHz):  $\delta$  162.6, 148.9, 148.2, 144.9, 142.1, 133.5 (d,  $J_{\text{C-F}} = 9.2$  Hz), 128.5, 127.7, 127.1, 126.5 (d,  $J_{\text{C-F}} = 23.3$  Hz), 125.2 (d,  $J_{\text{C-F}} = 7.4$  Hz), 122.5, 121.2, 111.6 (d,  $J_{\text{C-F}} = 123.2$  Hz), 83.0, 76.0; IR (KBr,  $\text{cm}^{-1}$ ):  $\nu$  3408, 2955, 2927, 2849, 1729, 1643, 1594, 1492, 1450, 1301, 1266, 1250, 1207, 1190, 1157, 1088, 923, 902, 862, 838, 801, 763, 745, 725, 702; HRMS (ESI) calcd for  $\text{C}_{30}\text{H}_{18}\text{FNaN}_3\text{O}$  ( $[\text{M}+\text{Na}]^+$ ): 478.1332, found: 478.1330.

### 3. References

- [1] (a) G. Rassu, V. Zambrano, L. Pinna, C. Curti, L. Battistini, A. Sartori, G. Pelosi, G. Casiraghi and F. Zanardi, *Adv. Synth. Catal.*, 2014, **356**, 2330-2336; (b) X. Tang, J. Chang, C. Liu and B. Zhang, *Tetrahedron Lett.*, 2014, **55**, 6534-6537; (c) C. Xie, Z. Lu, W. Zhou, J. Han and Y. Pan, *Tetrahedron Lett.*, 2012, **53**, 6650-6653.
- [2] (a) W.-B. Chen, Z.-J. Wu, Q.-L. Pei, L.-F. Cun, X.-M. Zhang and W.-C. Yuan, *Org. Lett.*, 2010, **12**, 3132-3135; (b) F.-F. Pan, W. Yu, Z.-H. Qi, C. Qiao and X.-W. Wang, *Synthesis*, 2014, **46**, 1143-1156; (c) T. Z. Li, J. Xie, Y. Jiang, F. Sha and X. Y. Wu, *Adv. Synth. Catal.*, 2015, **357**, 3507-3511.

## 4. Copies of NMR Spectra of the Products 3

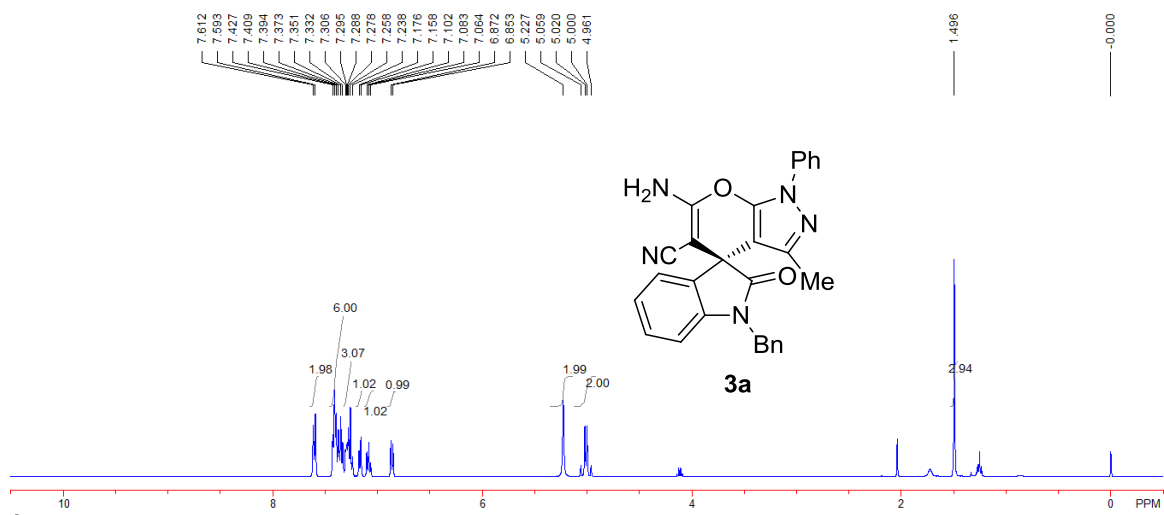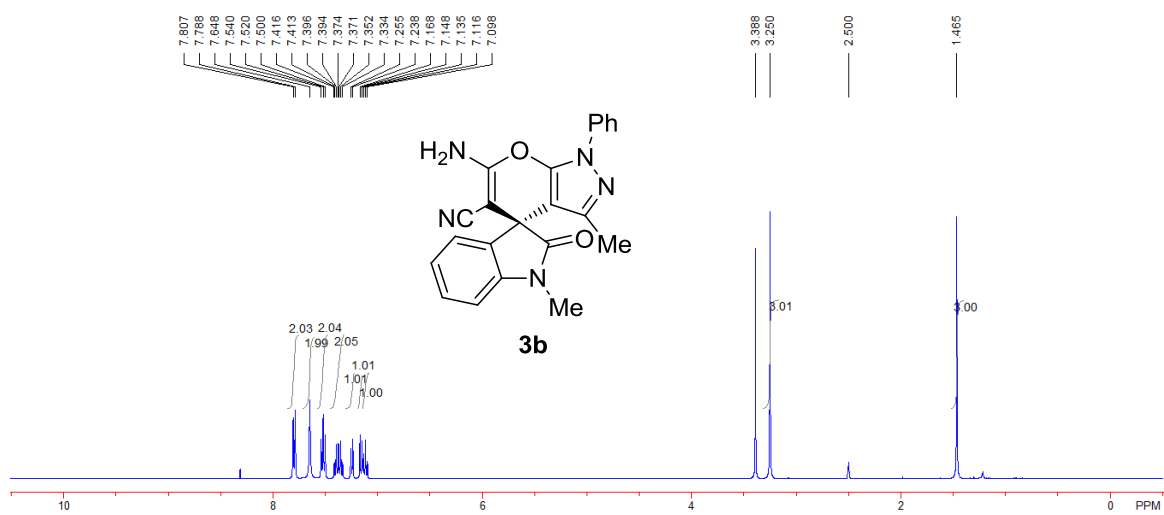

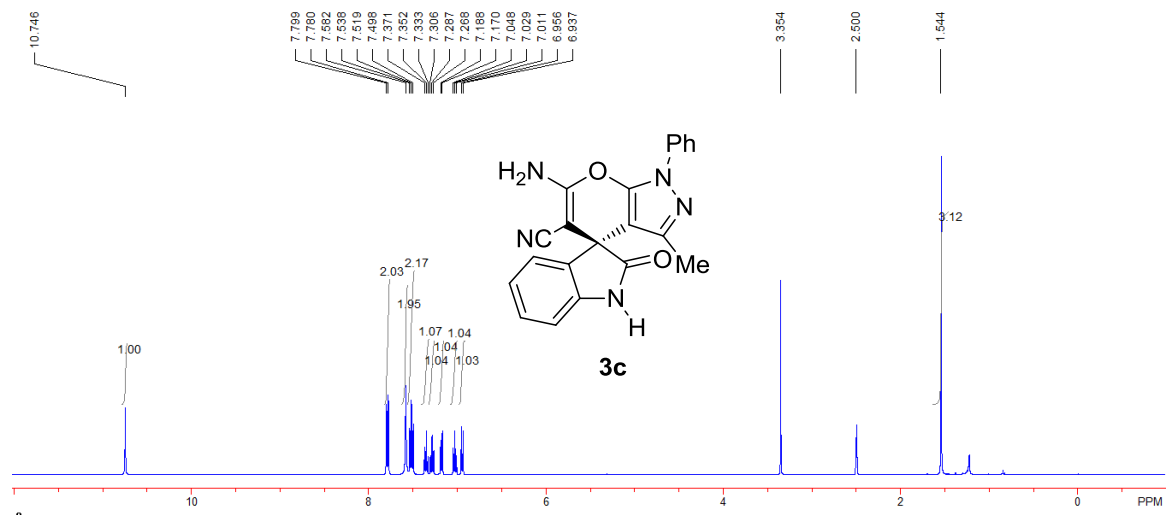



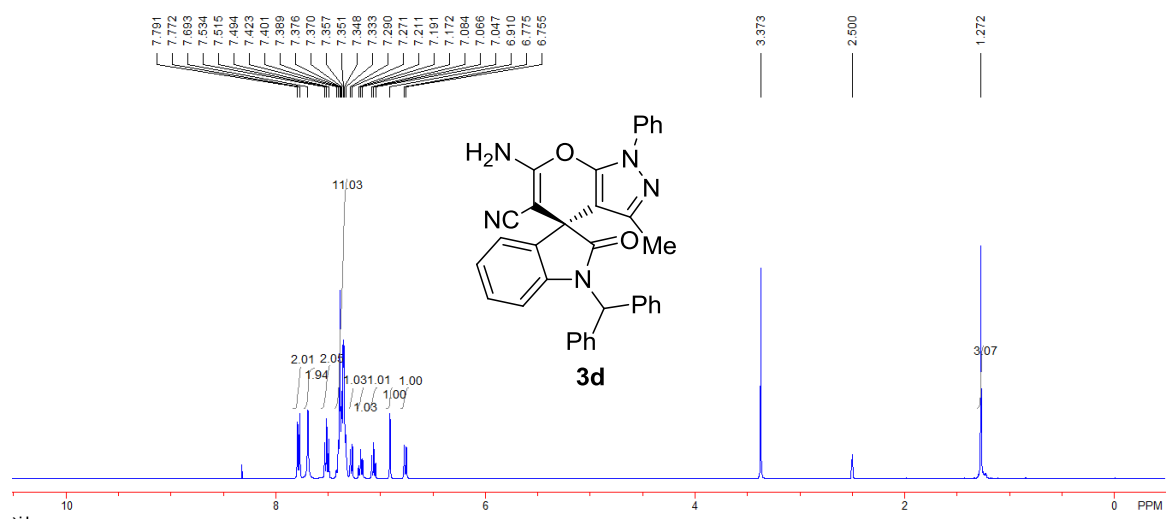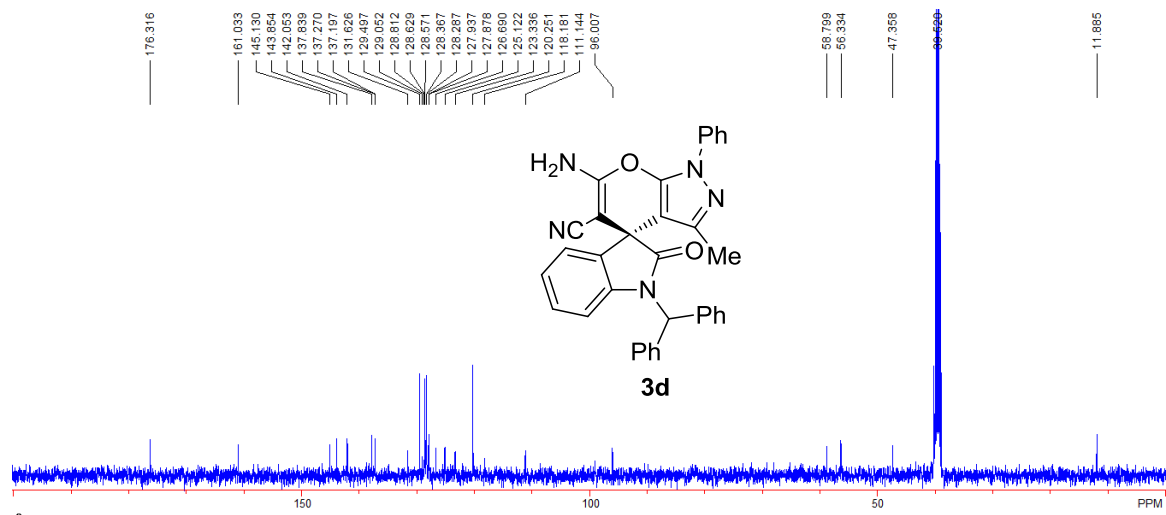

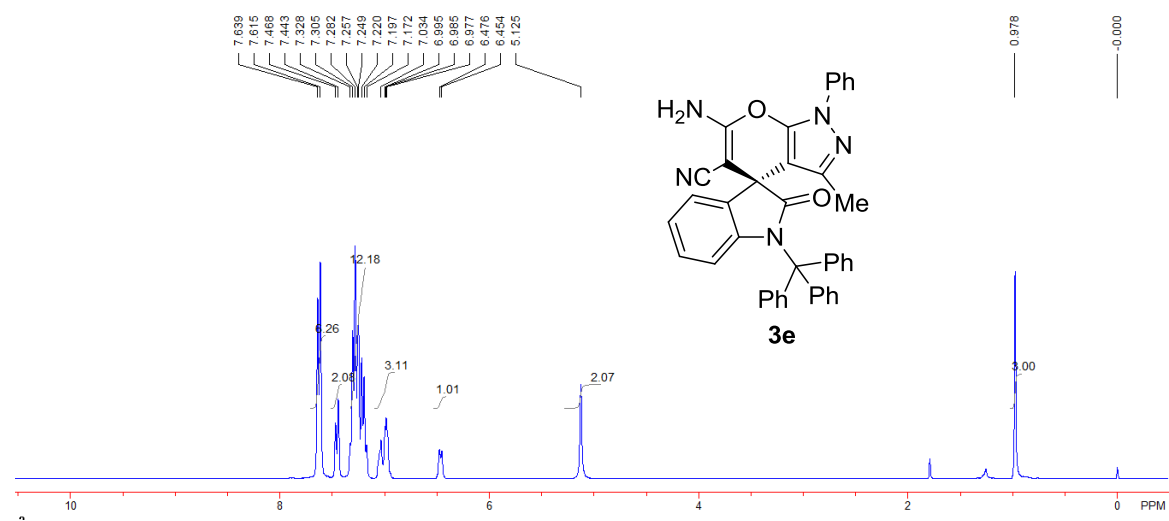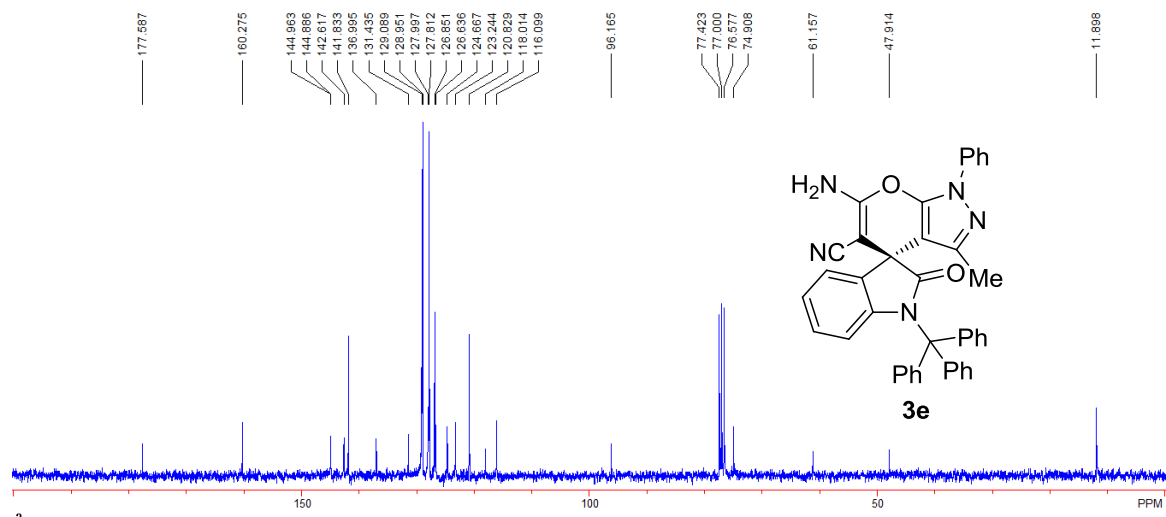

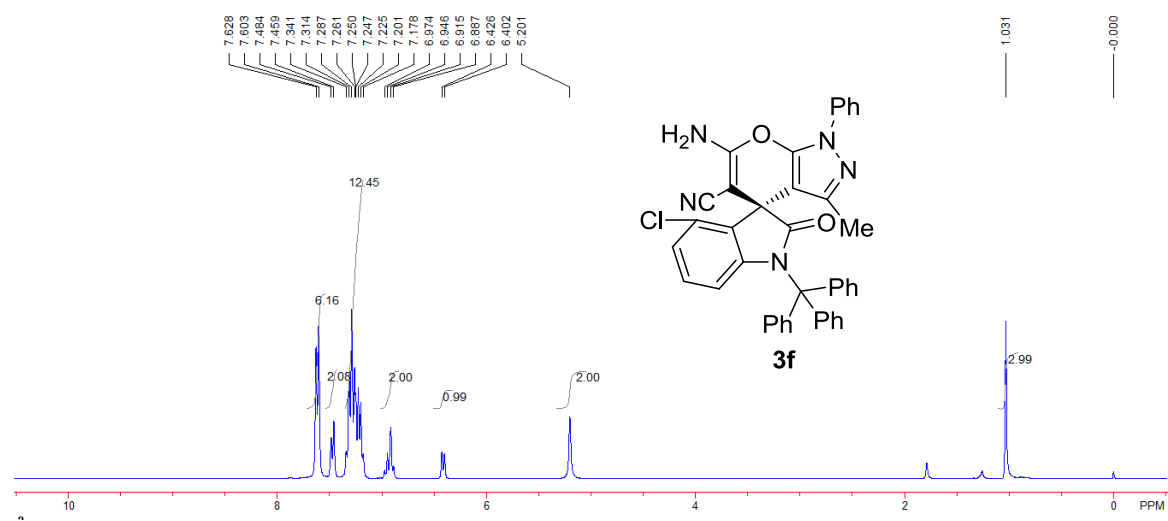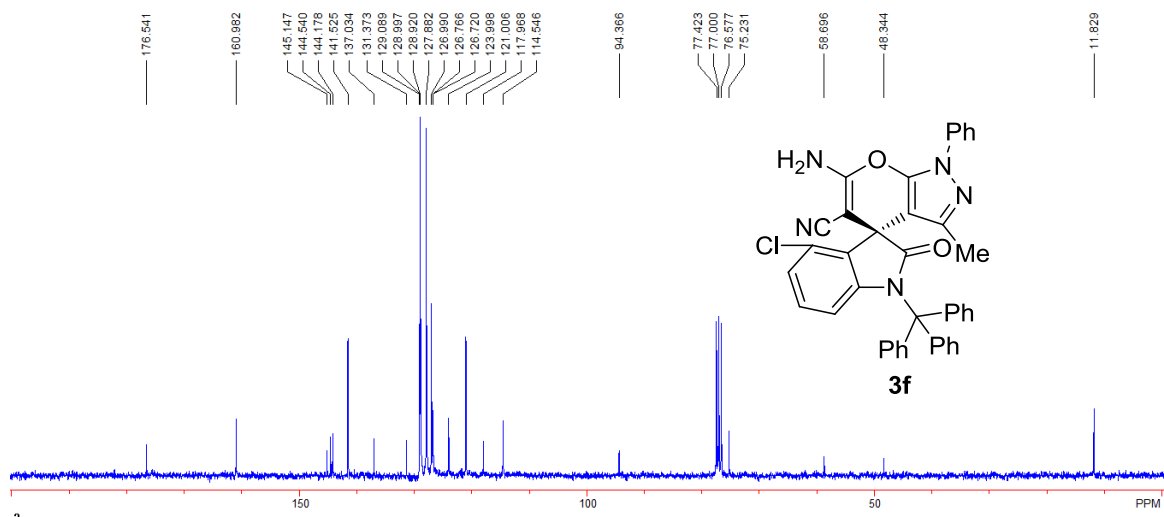

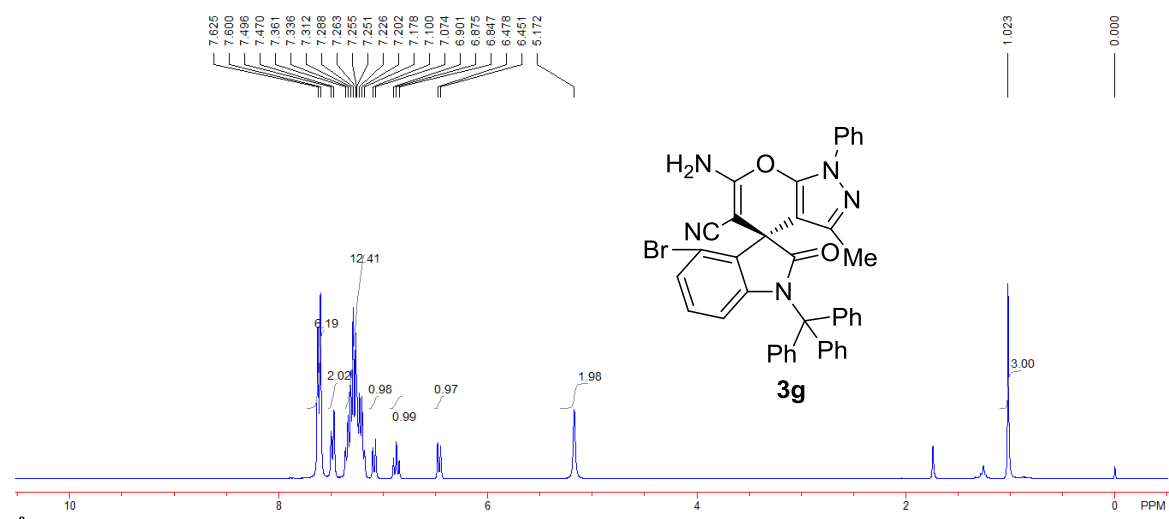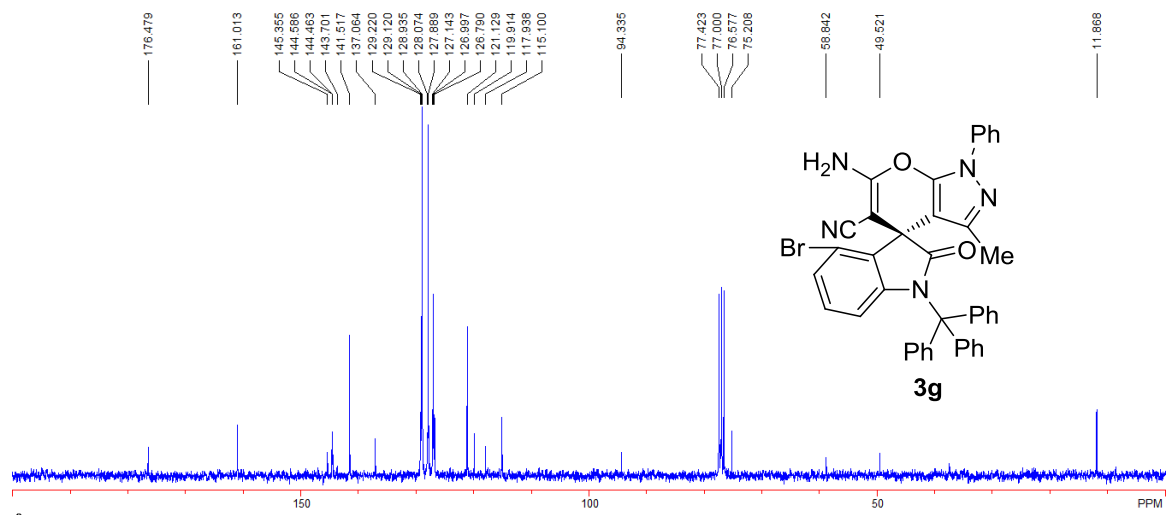

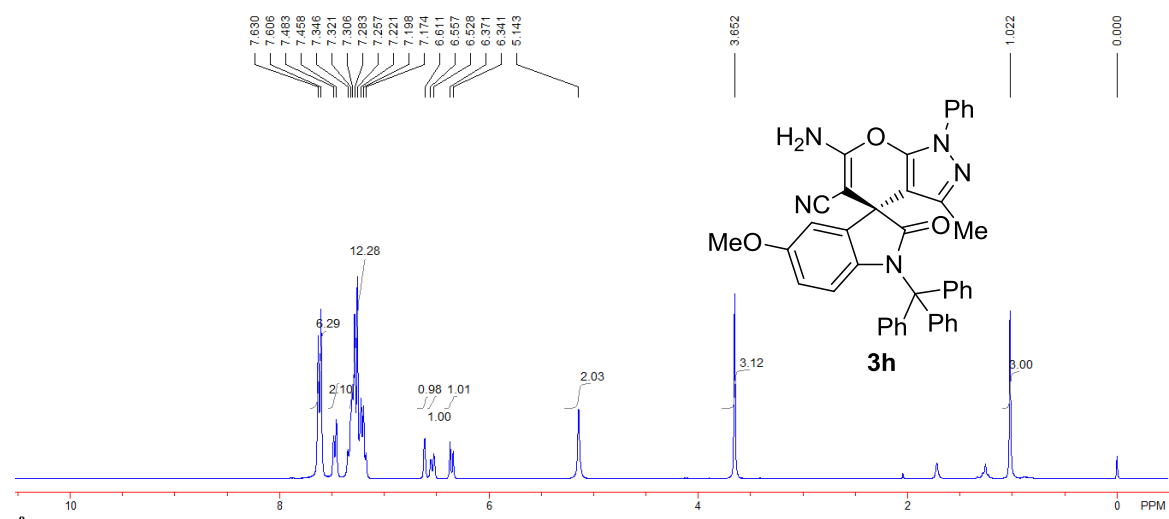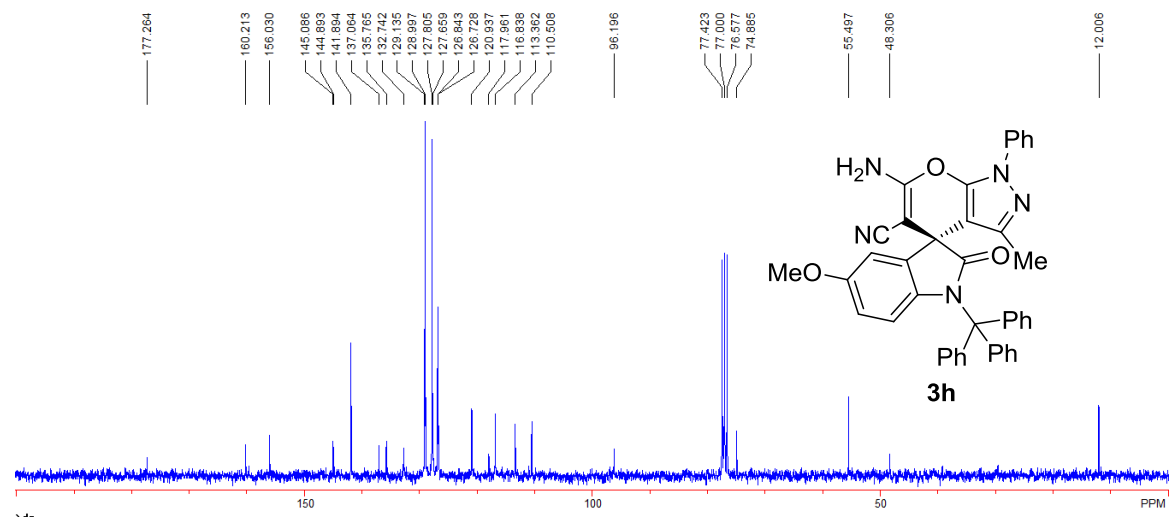

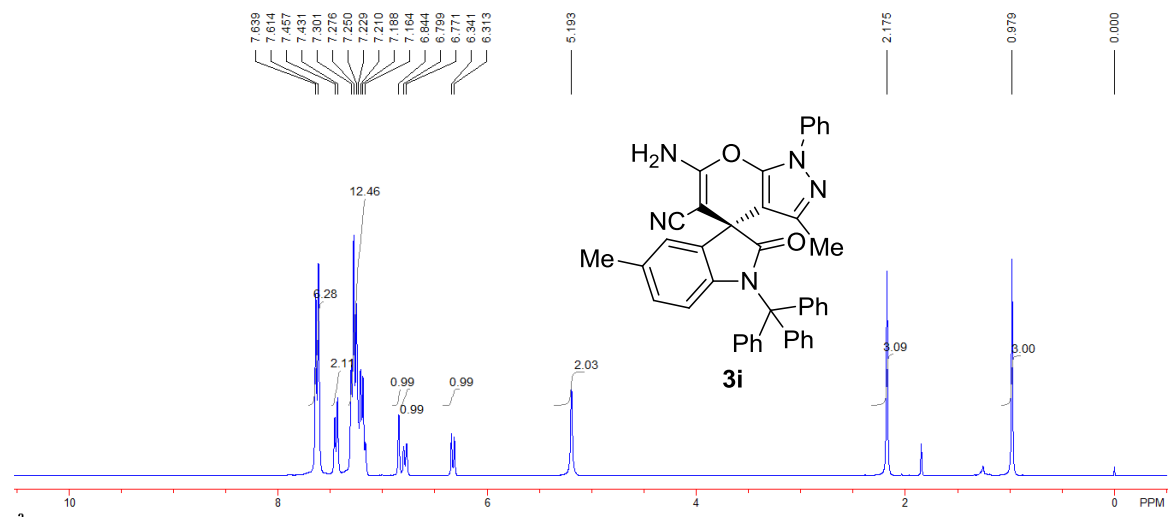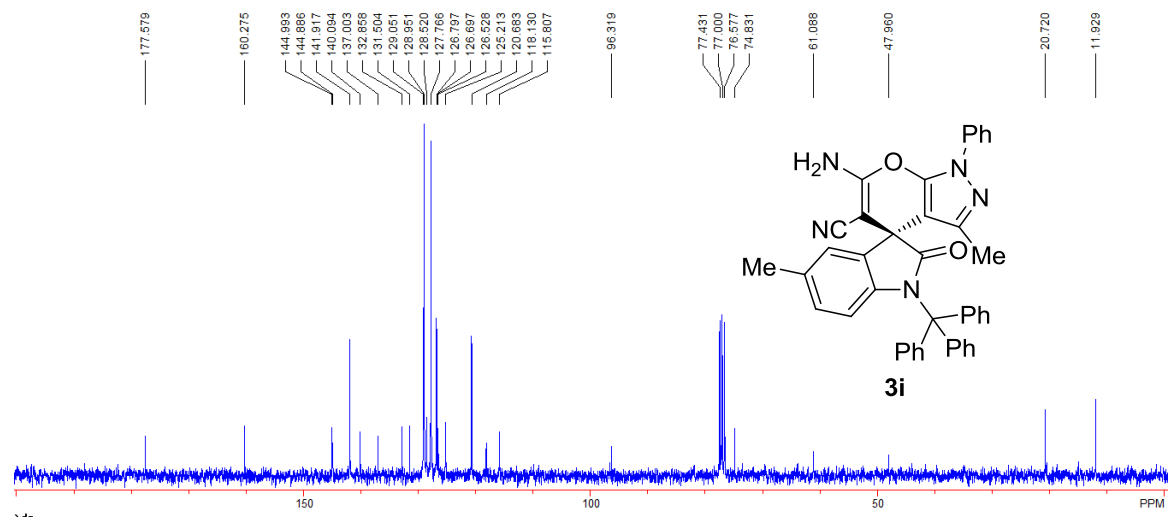

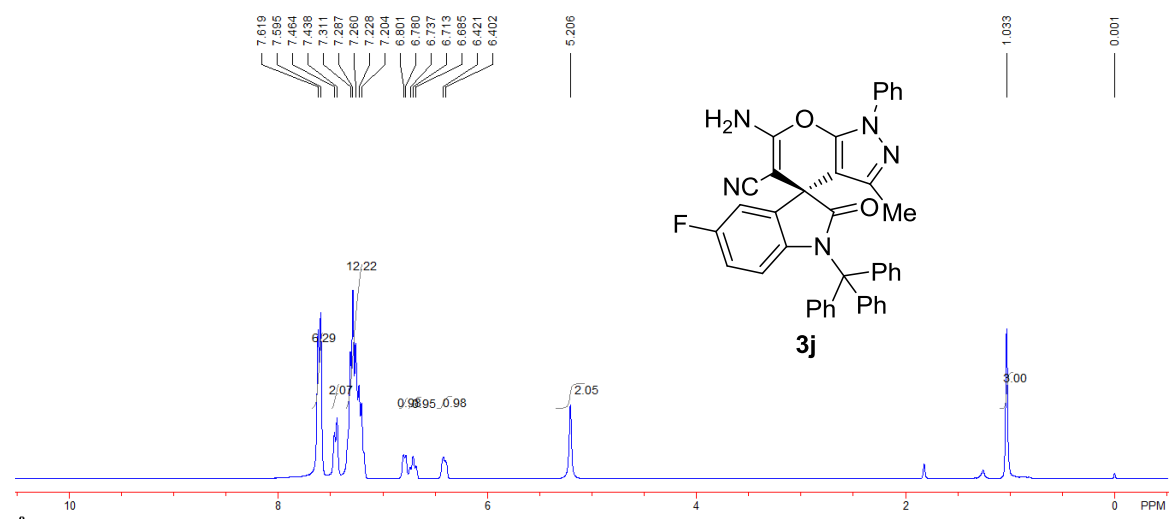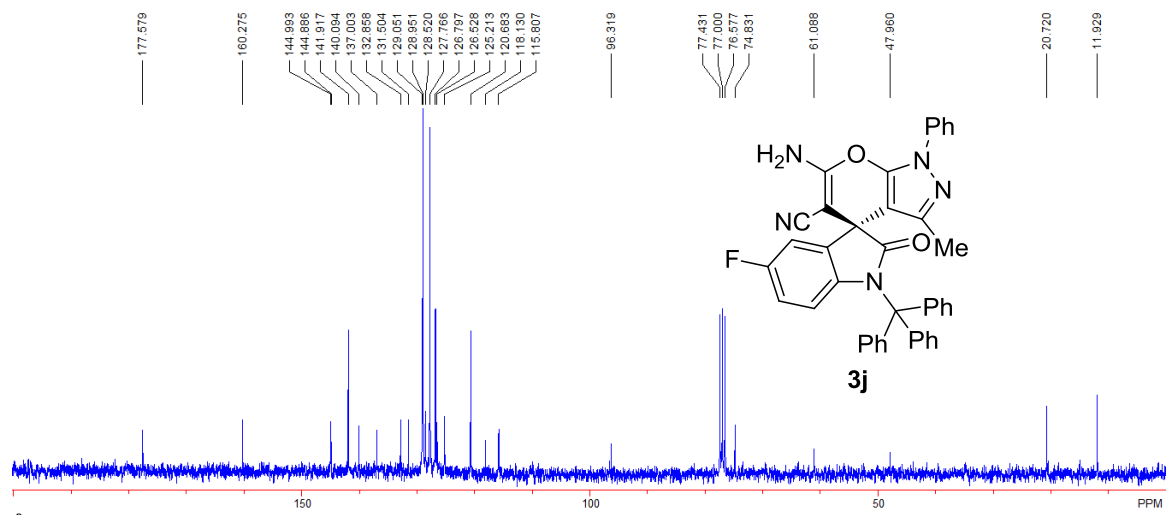

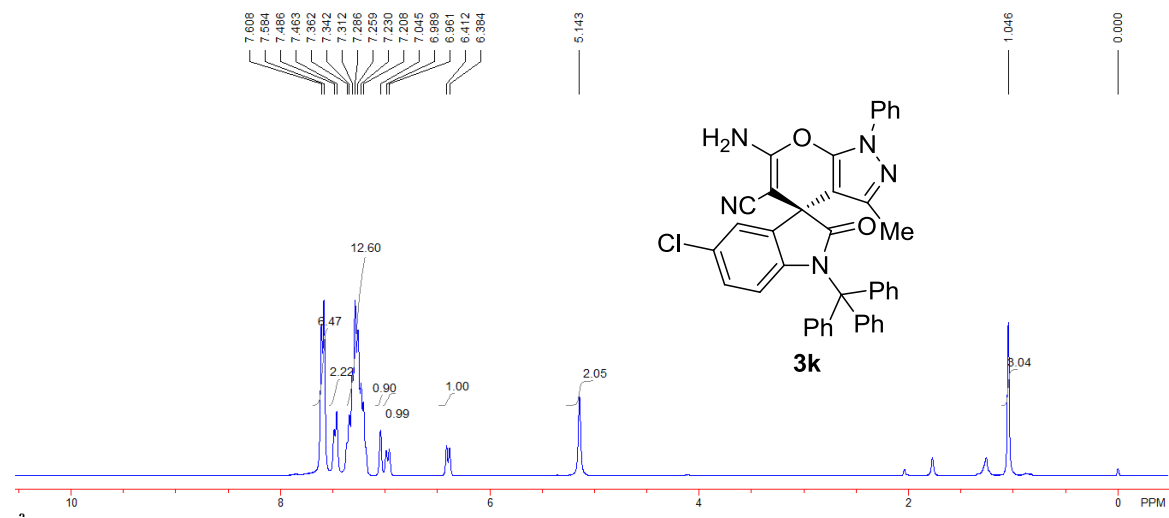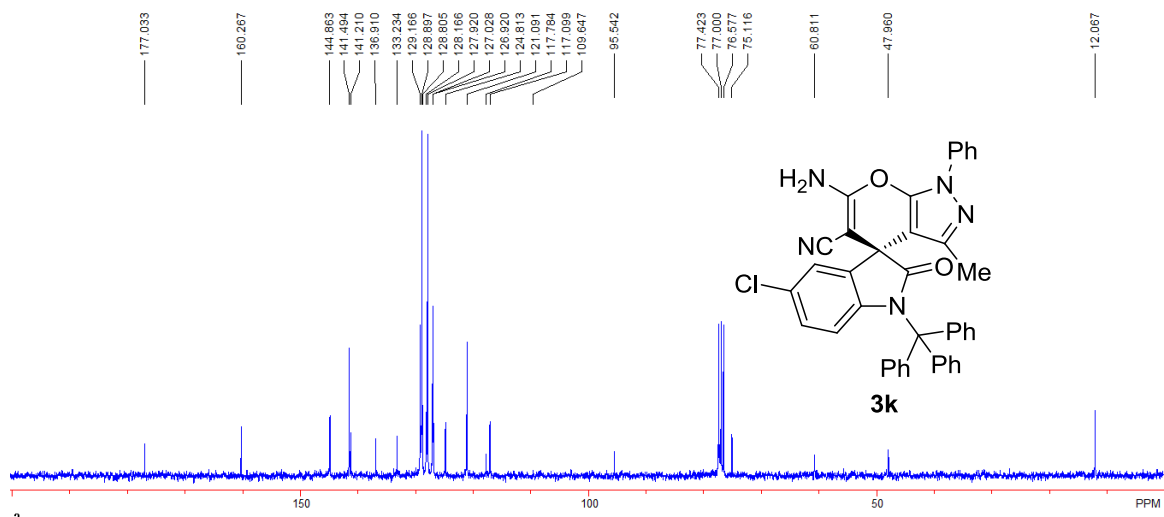



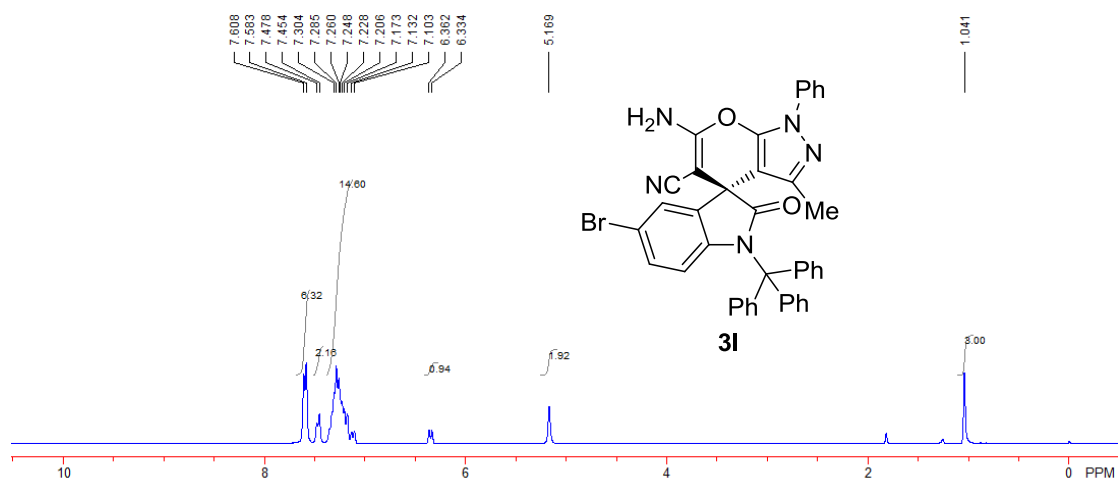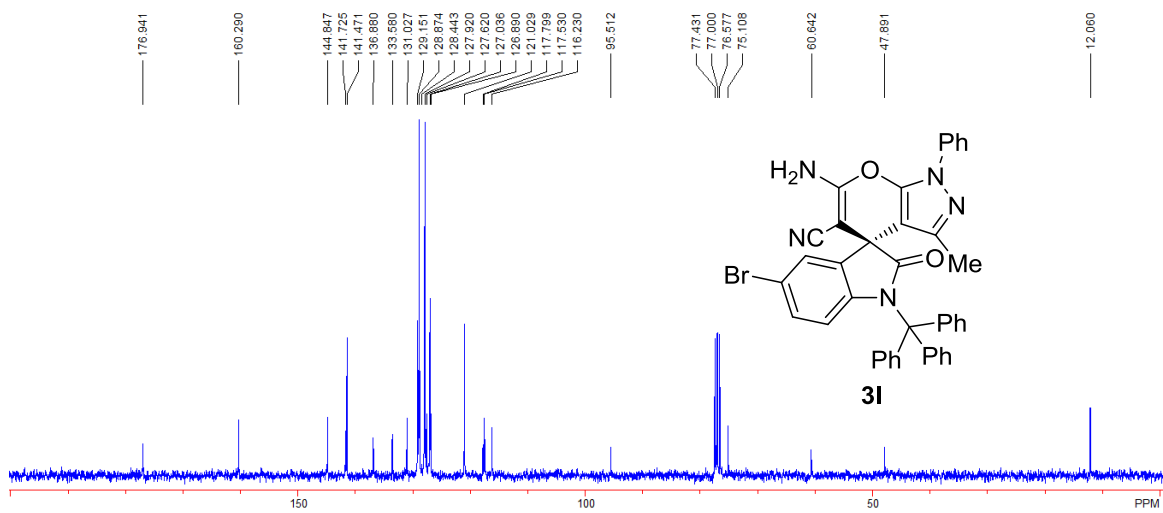

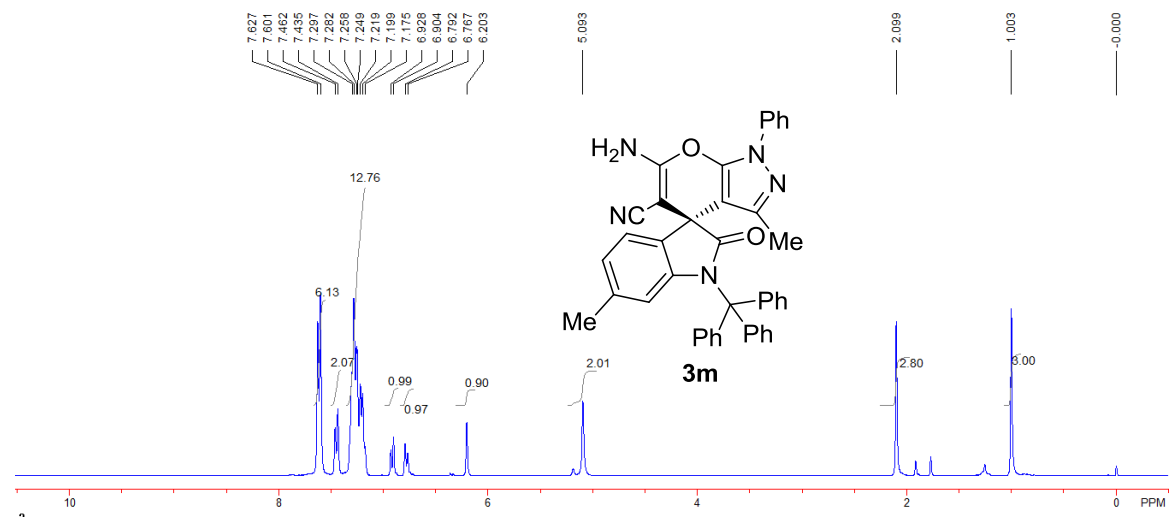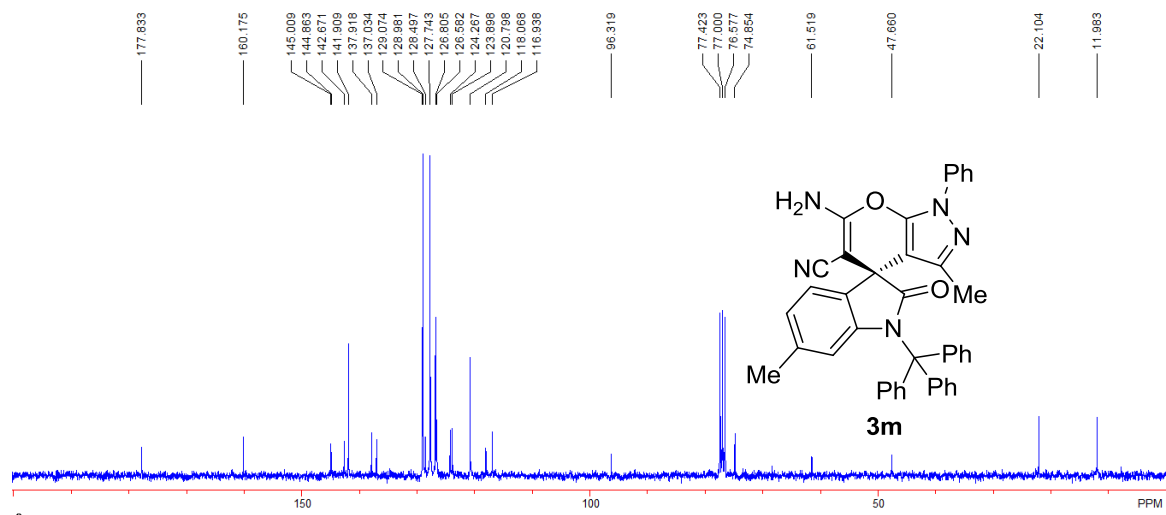

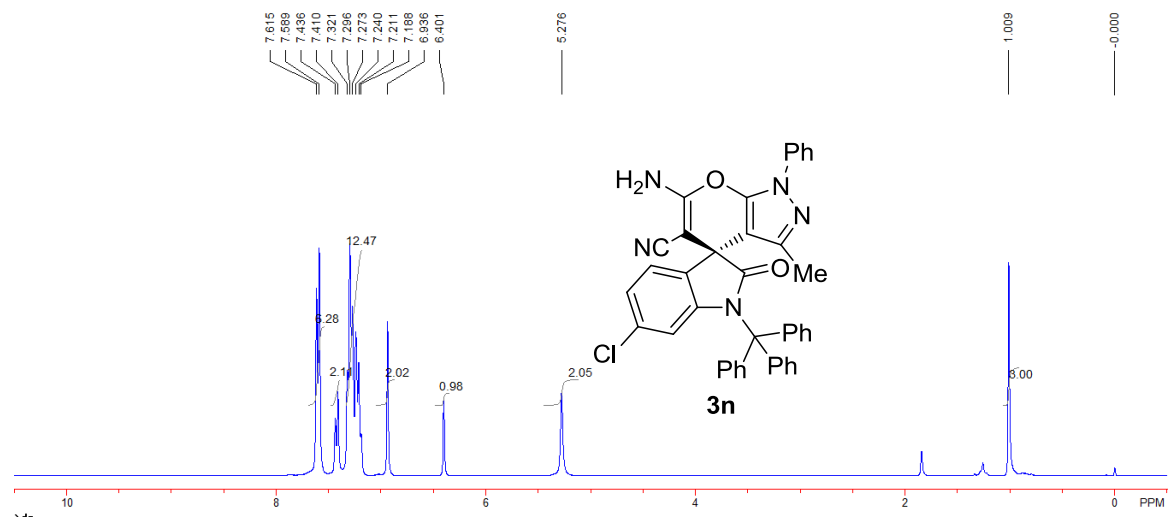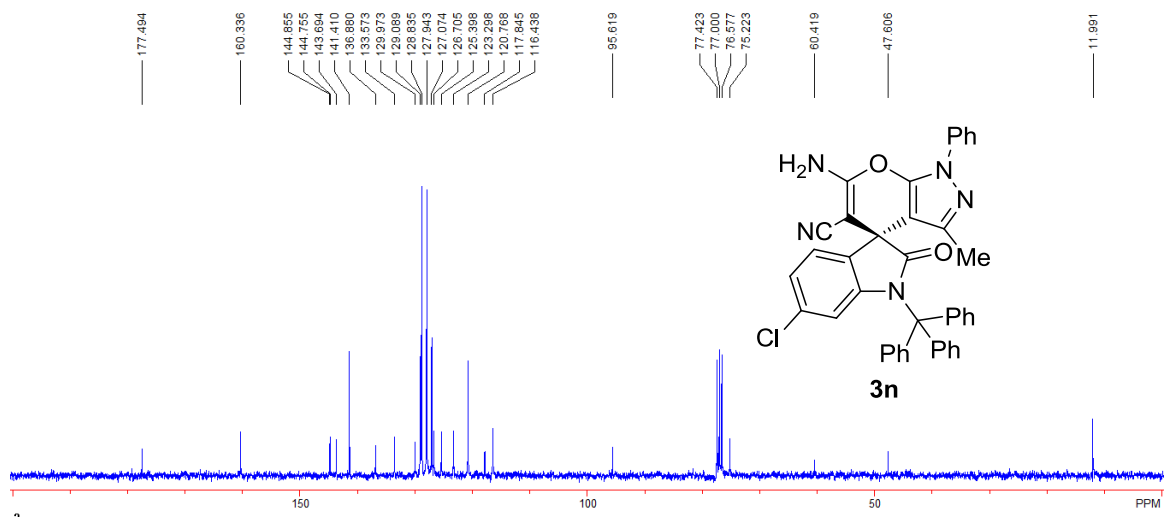

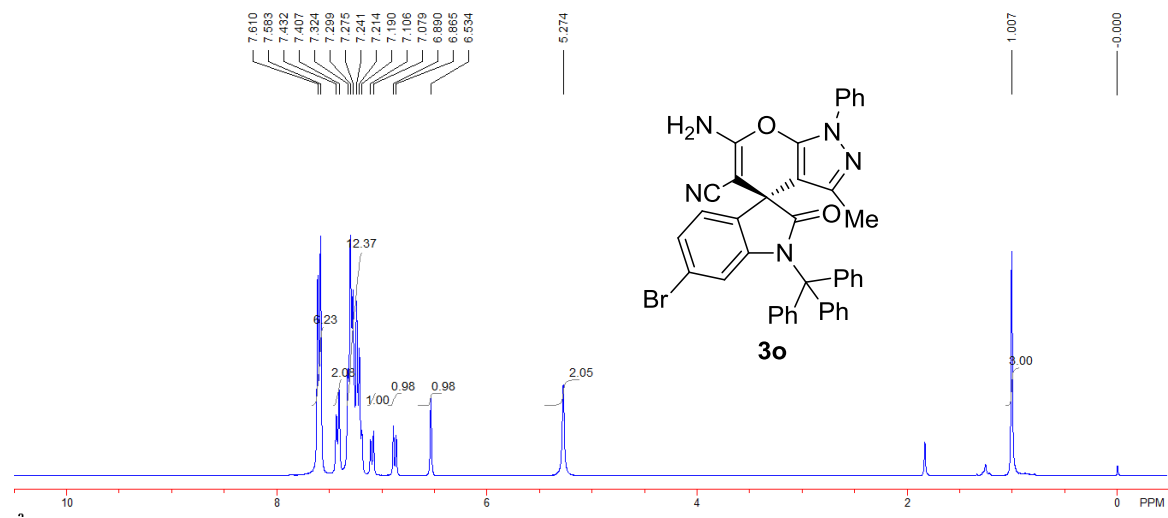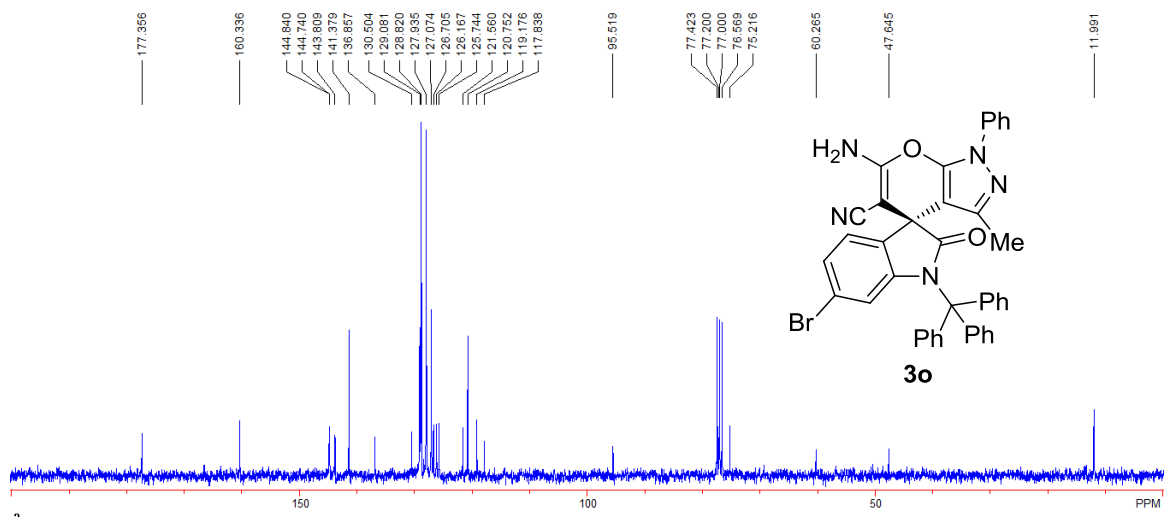

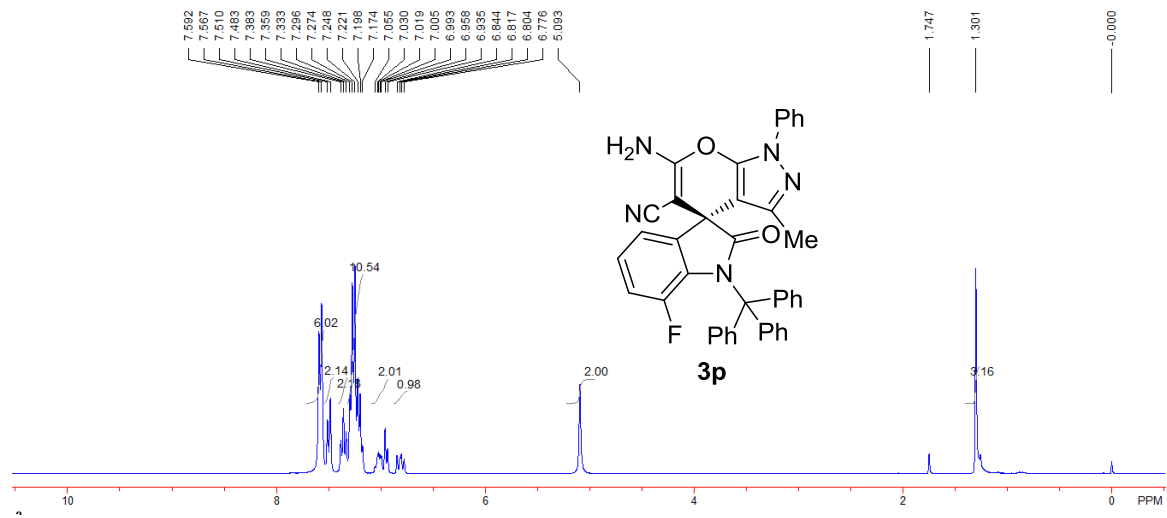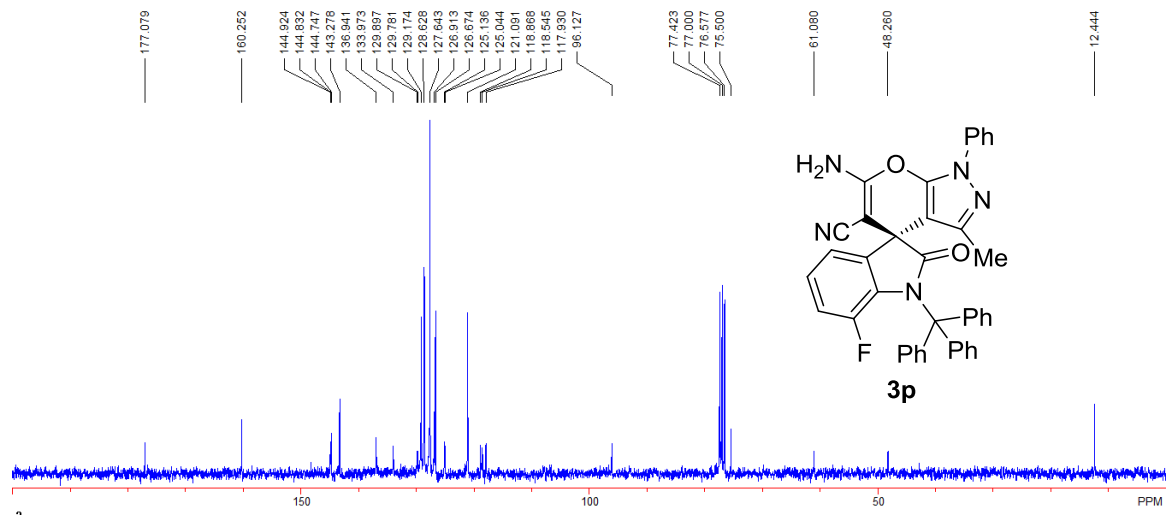

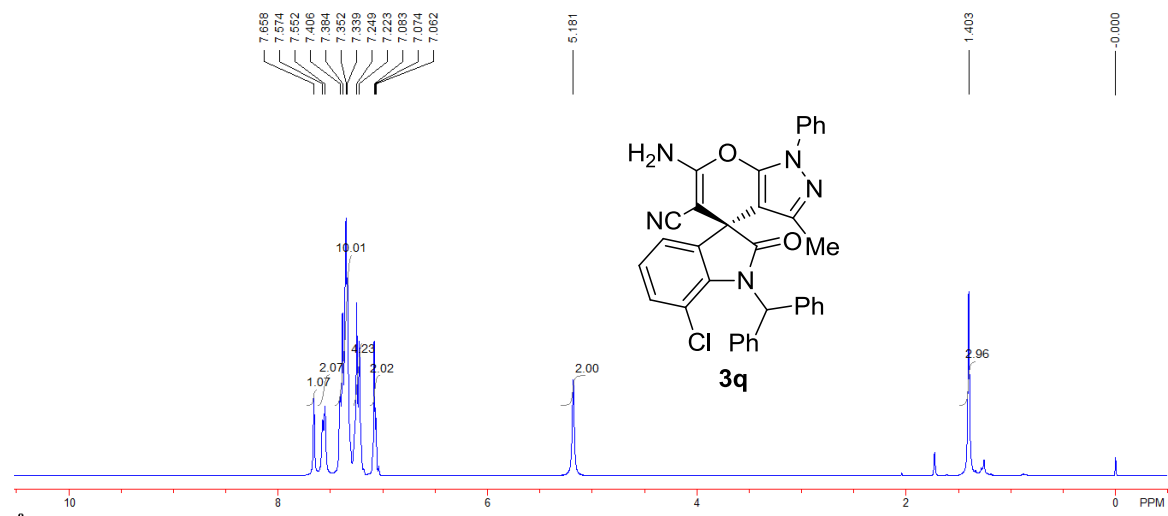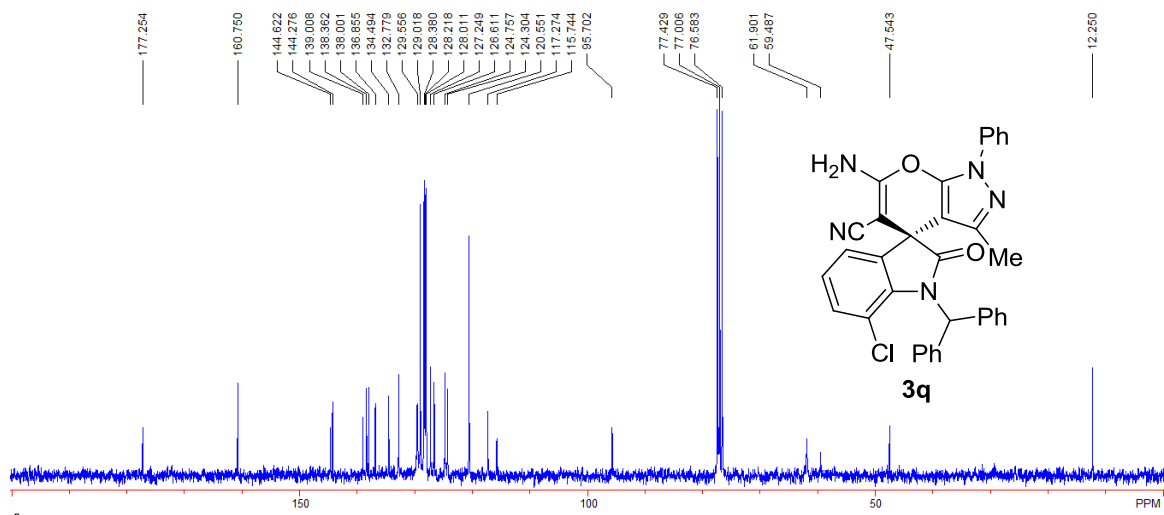

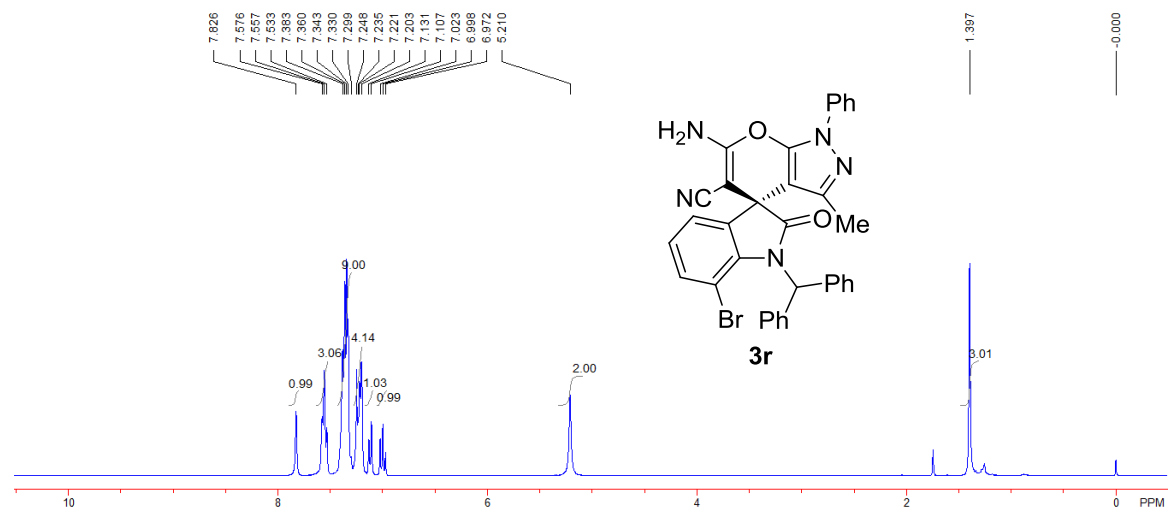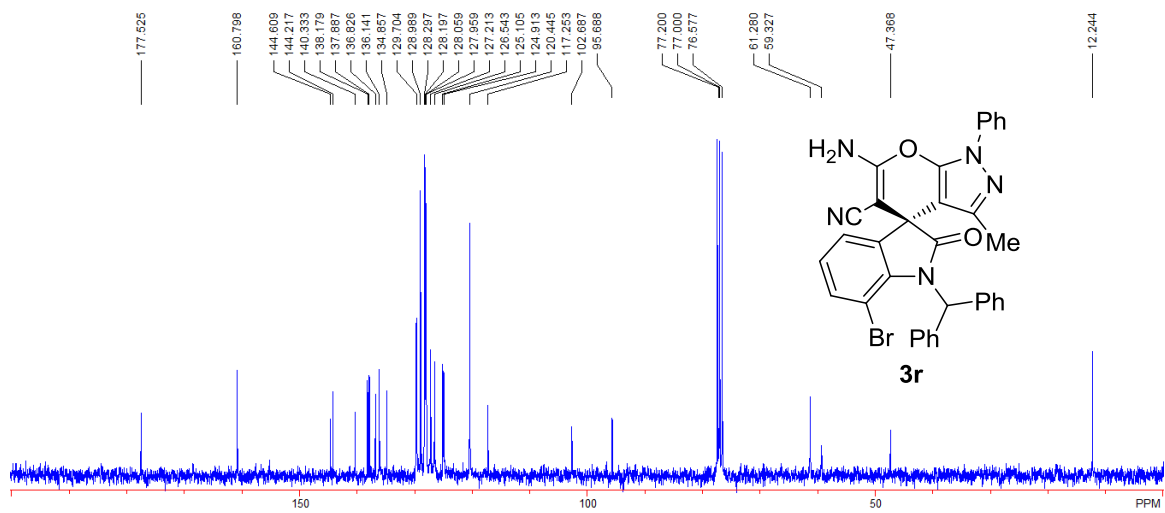

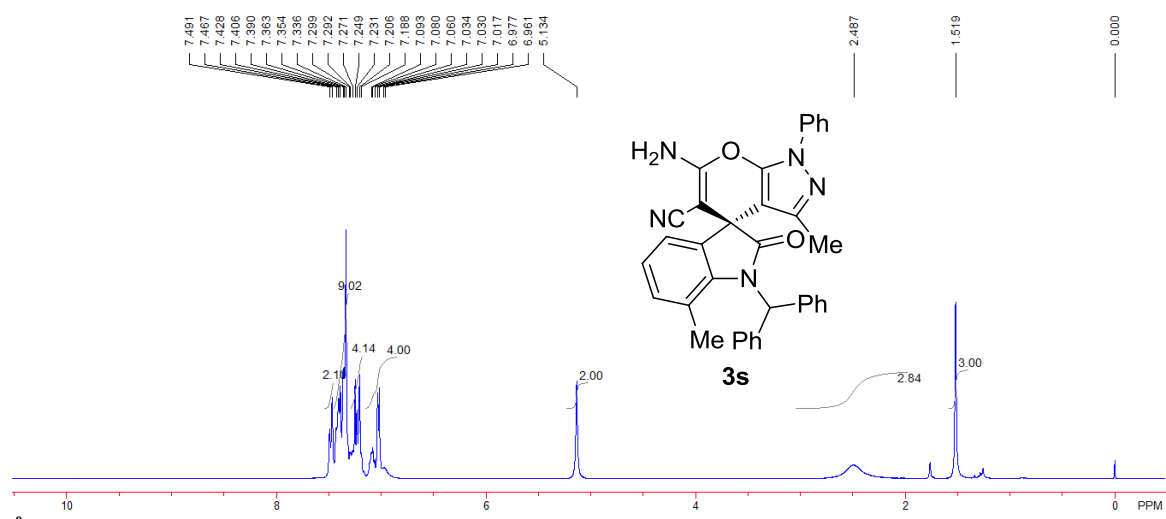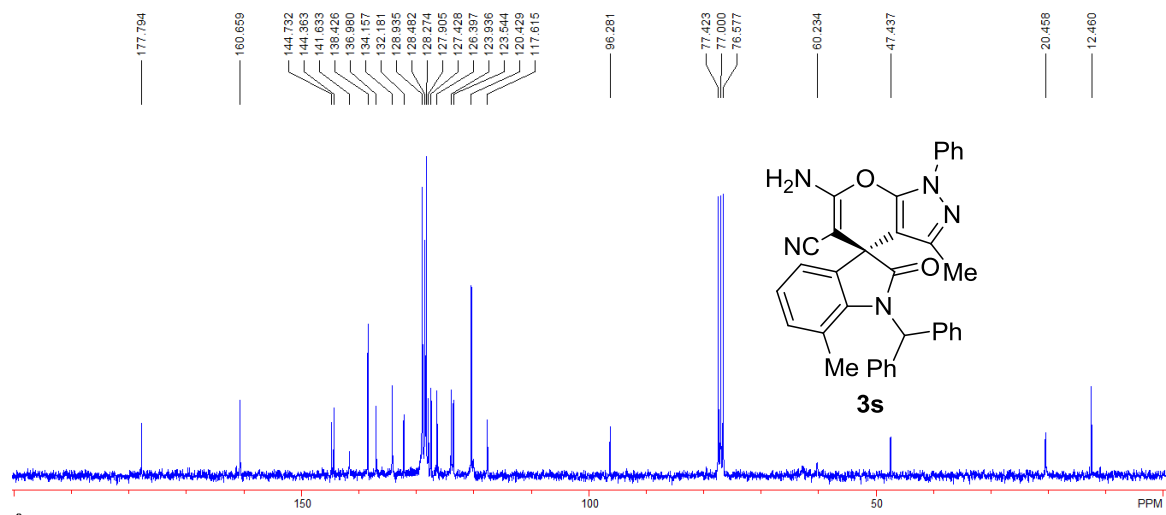



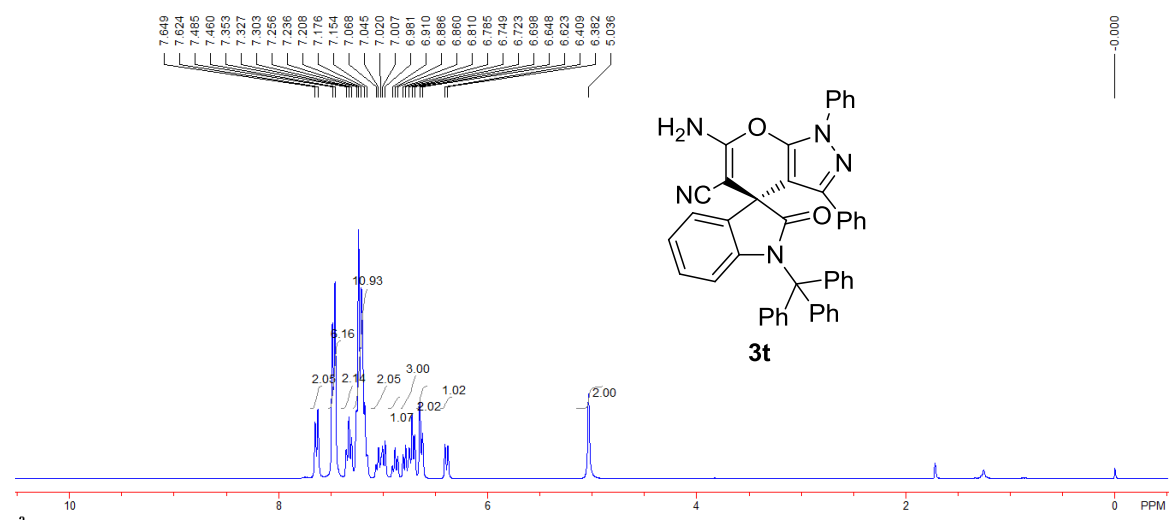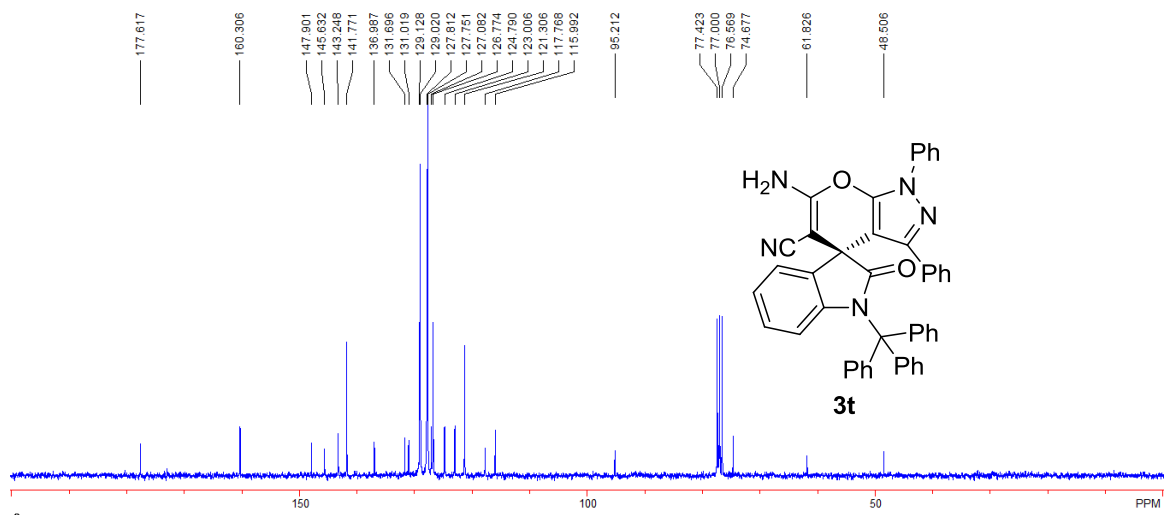

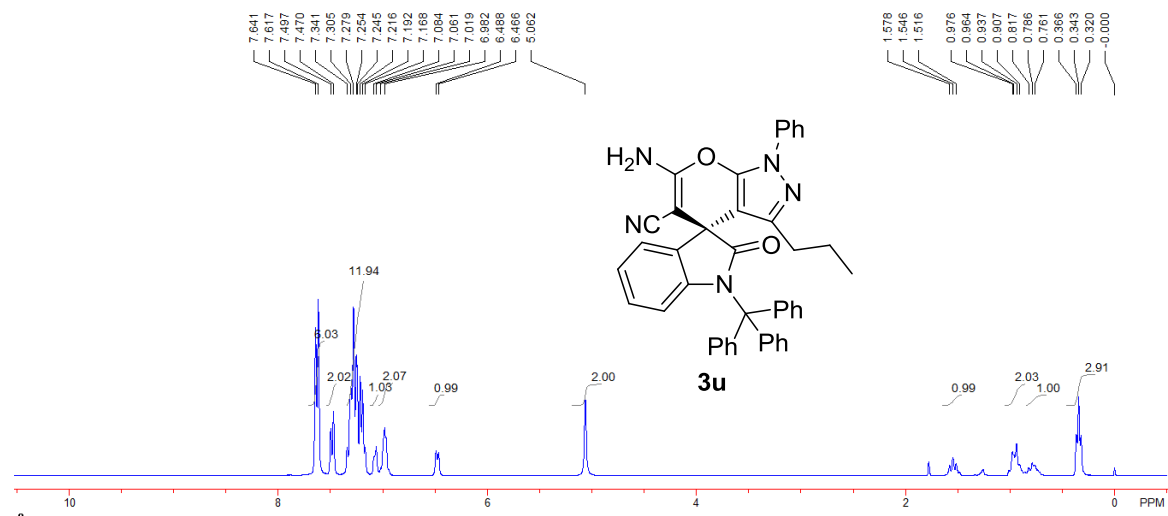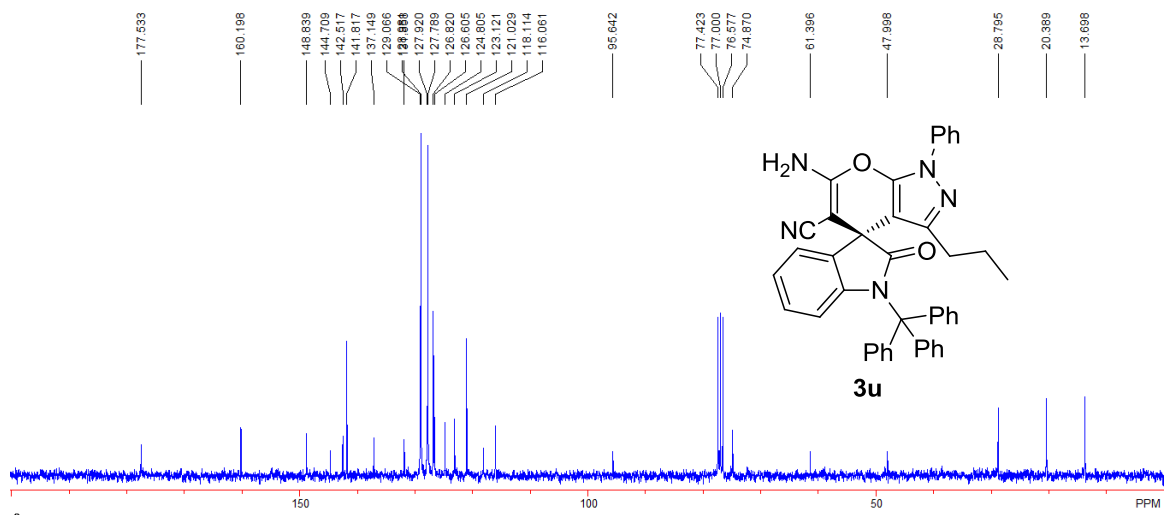

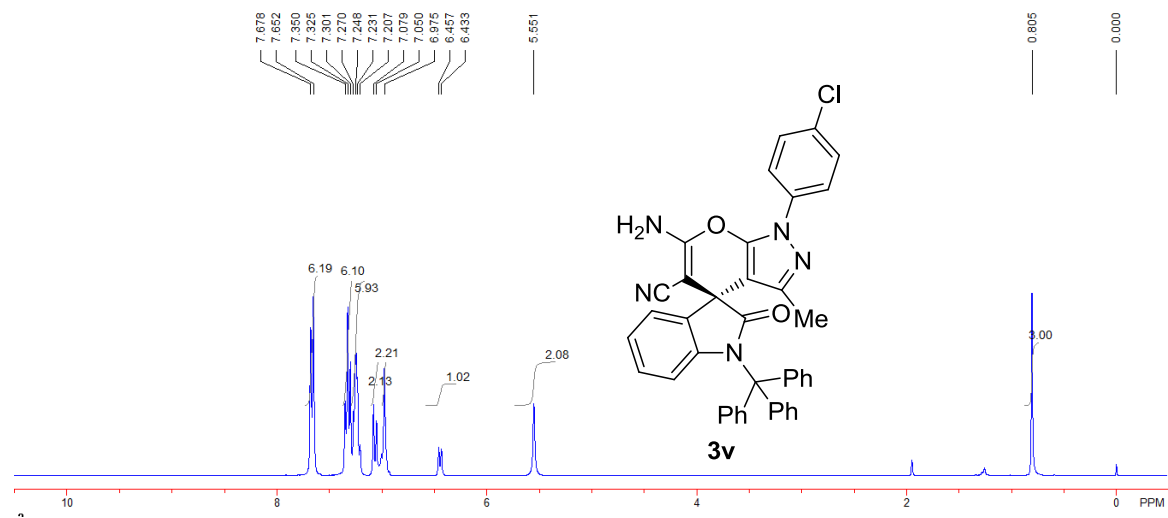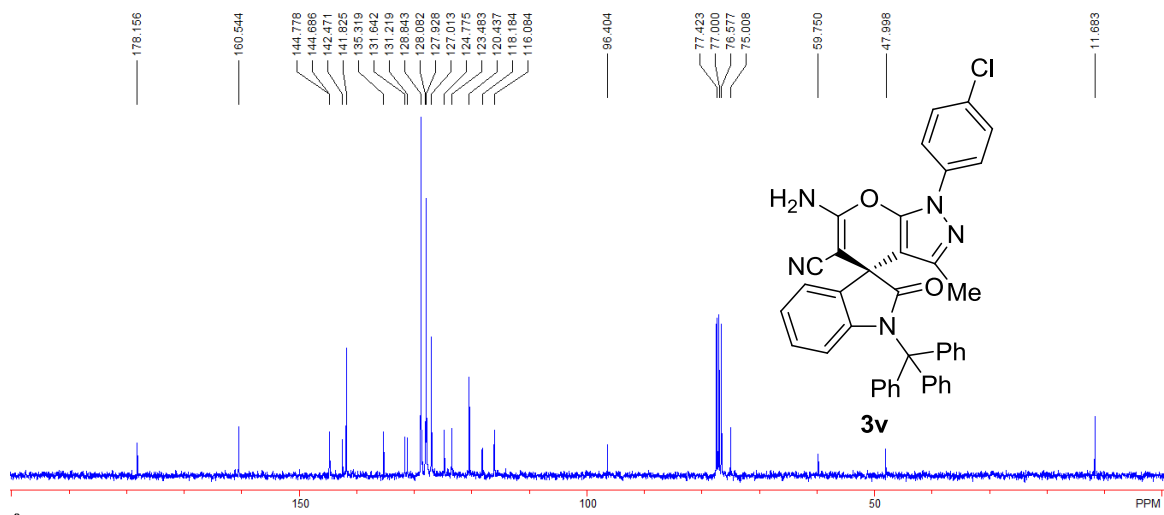

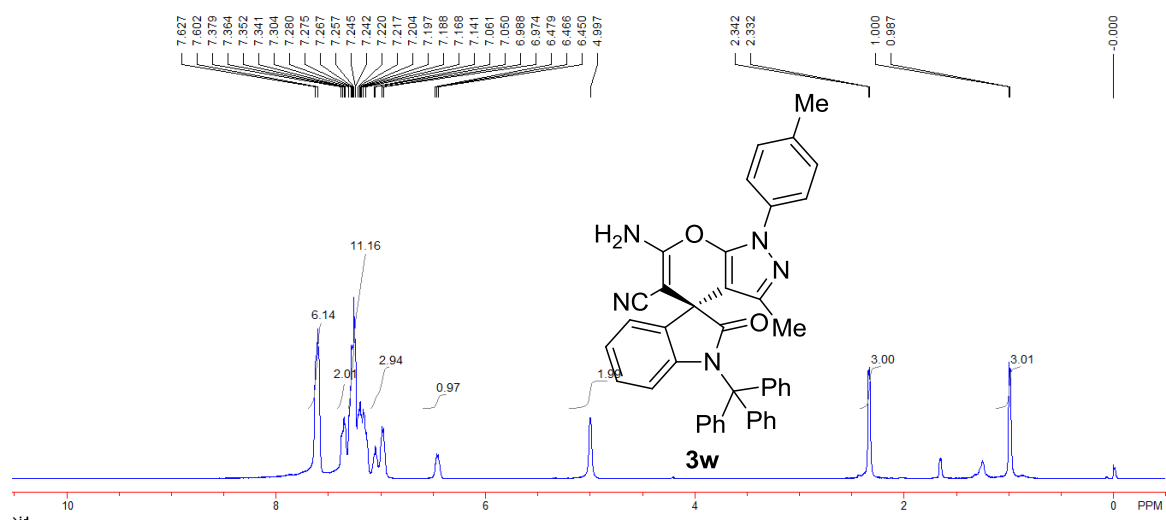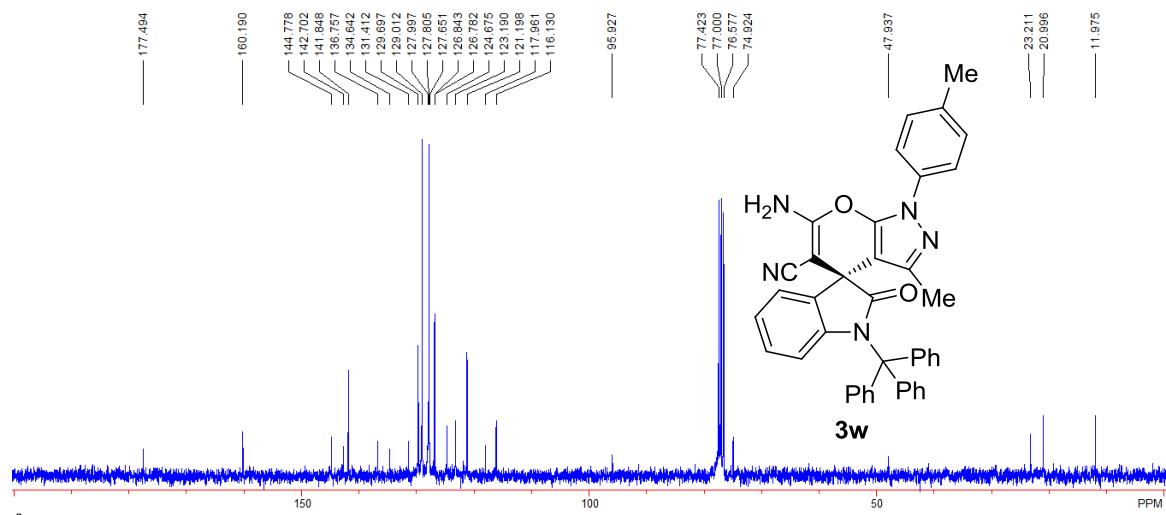

## 5. Copies of NMR Spectra of Substrates 2e-2p

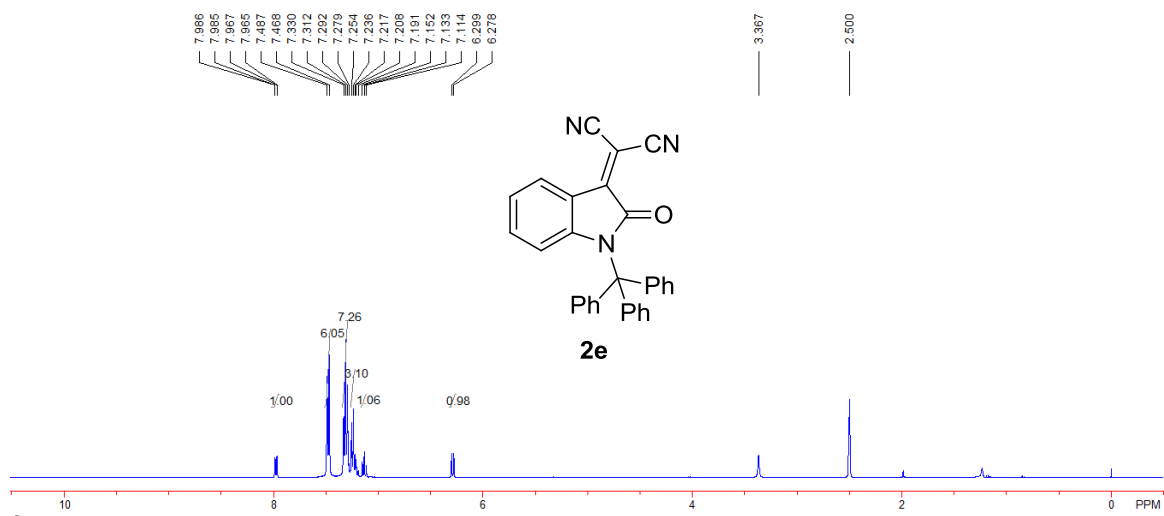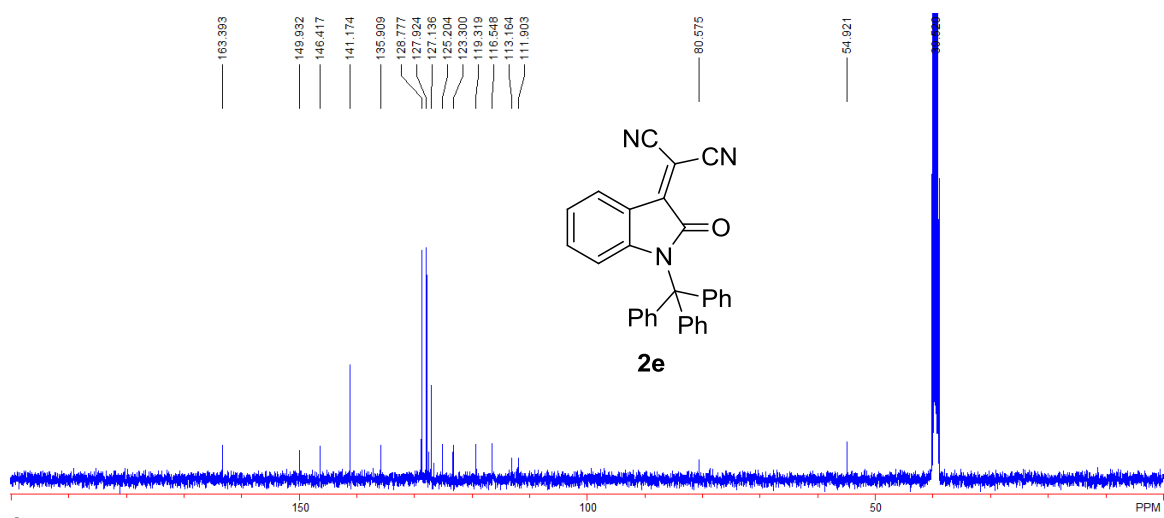

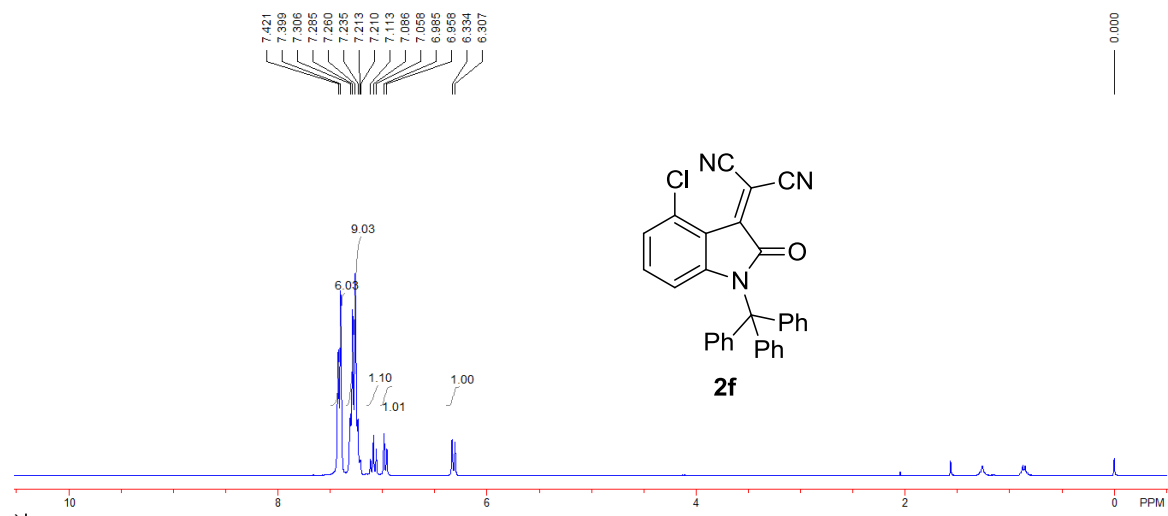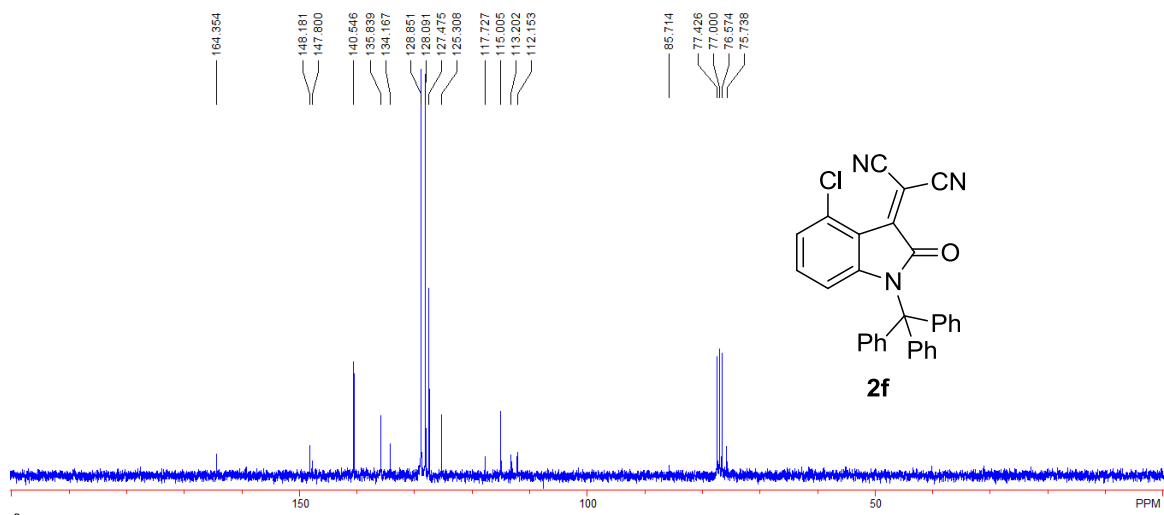

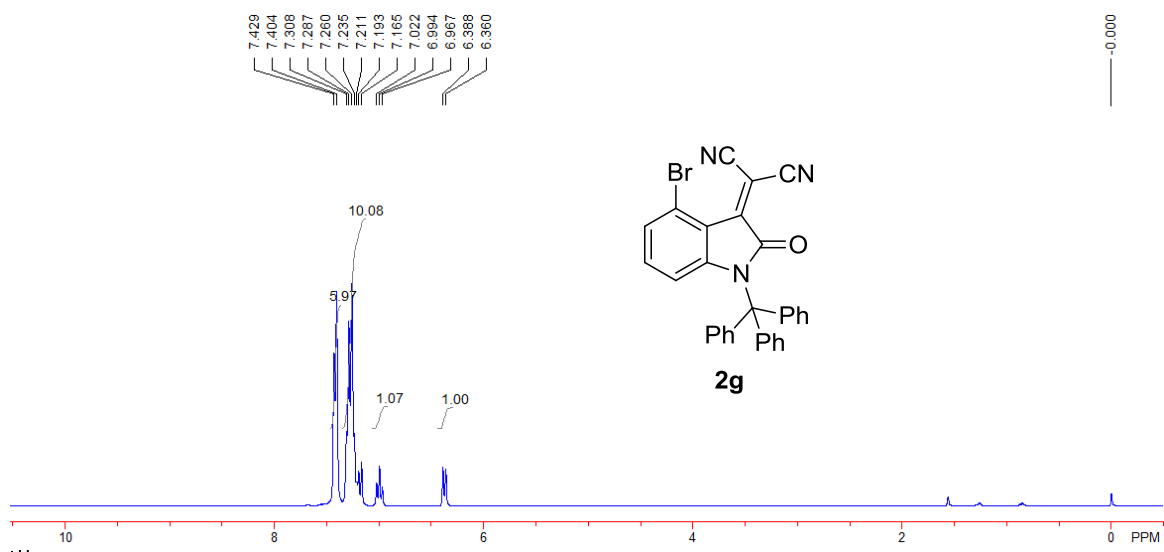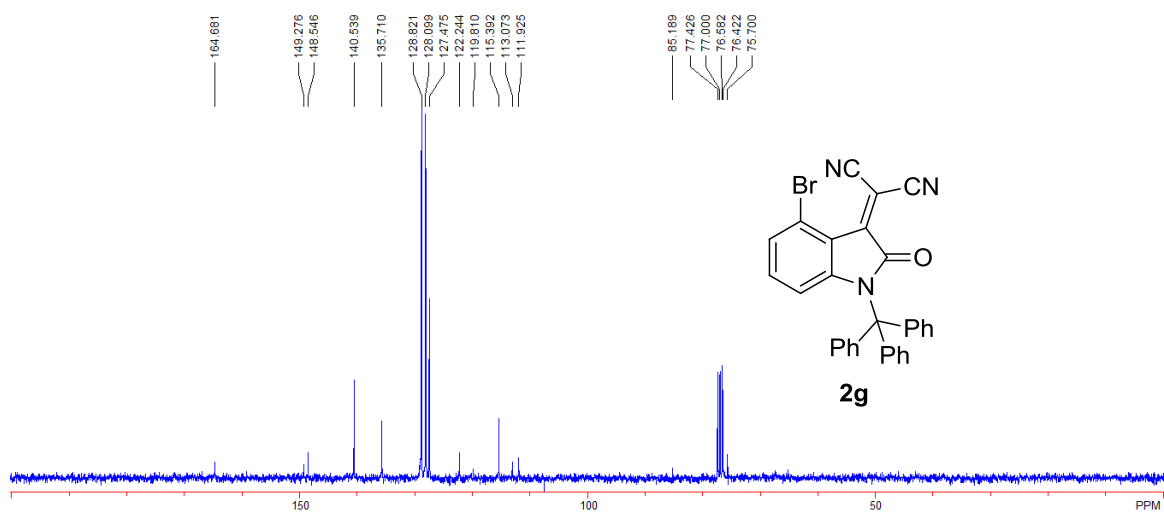

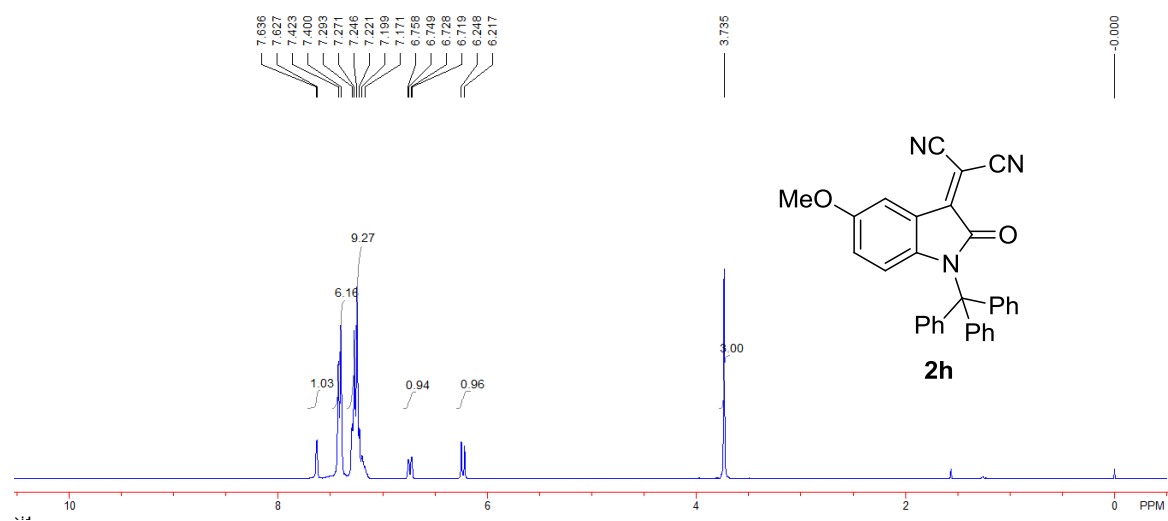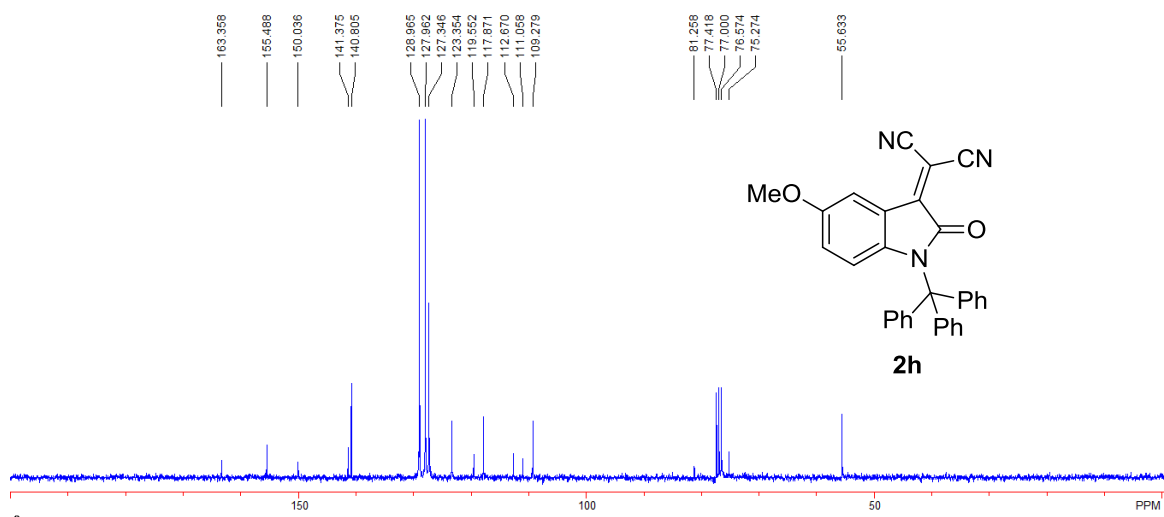



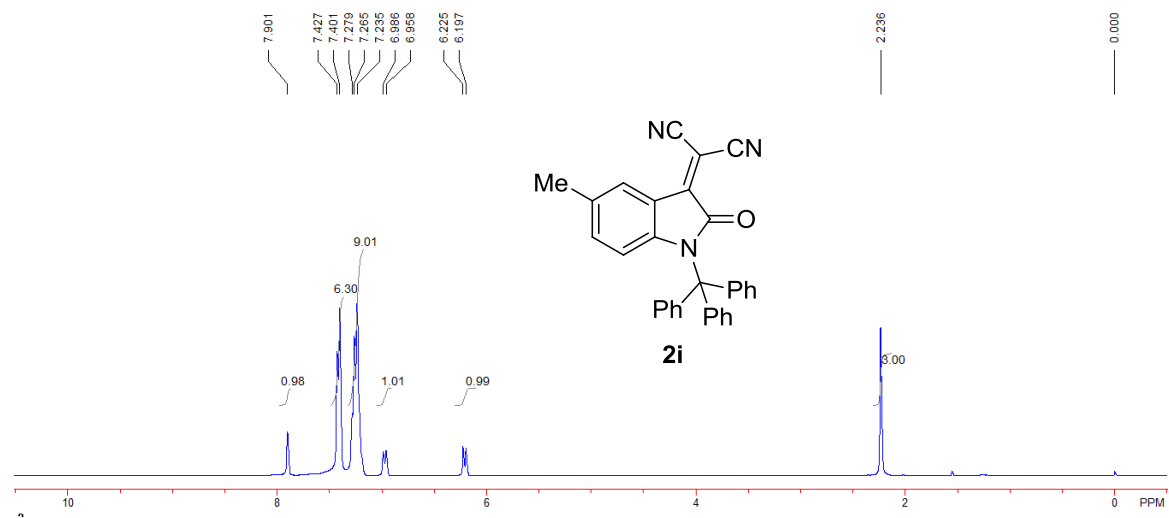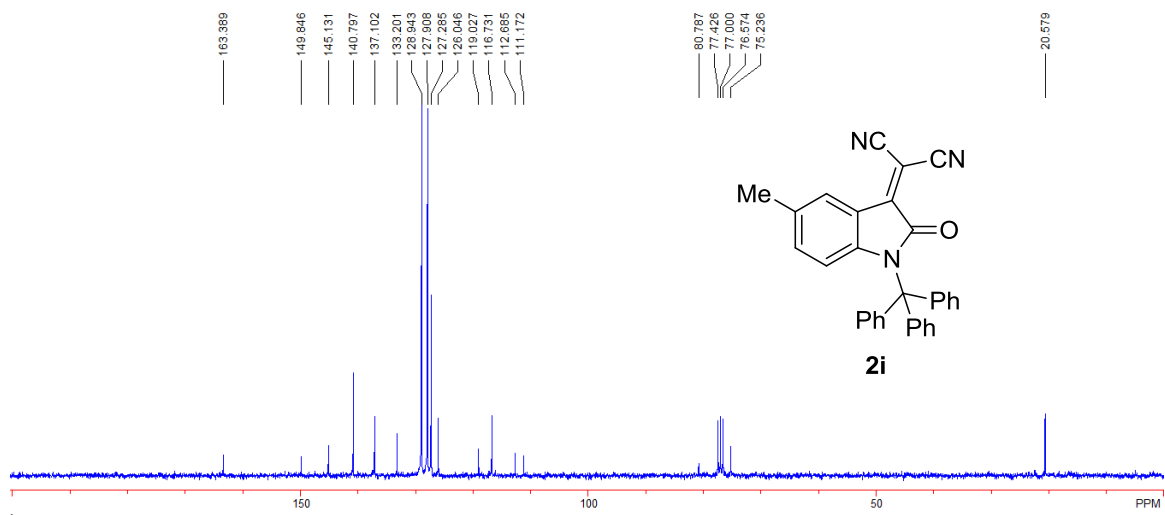

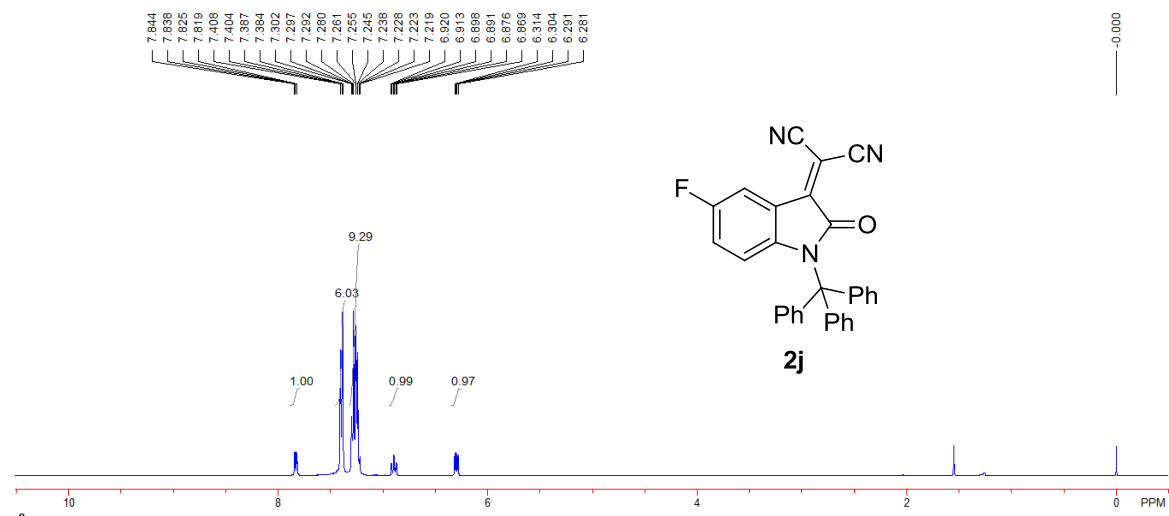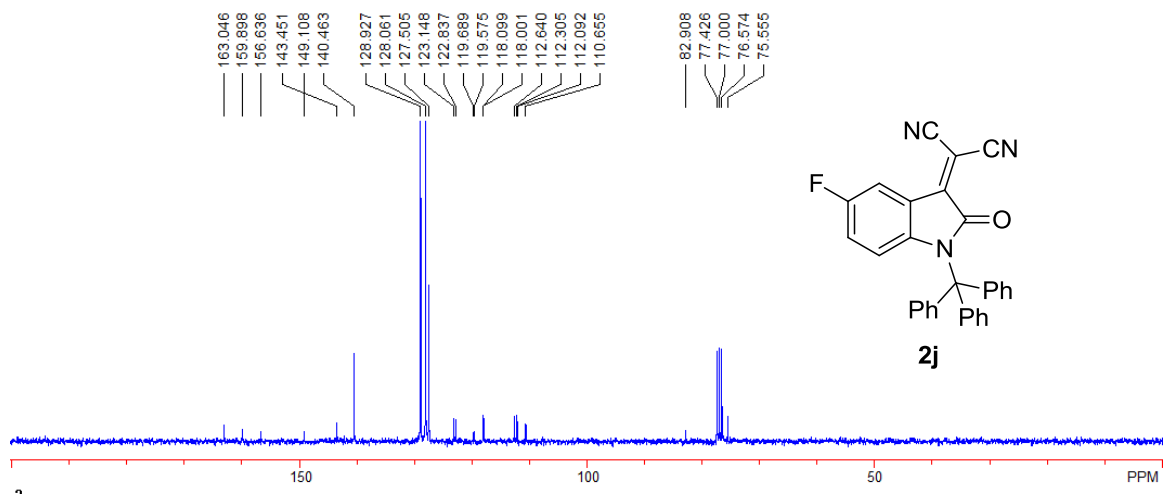

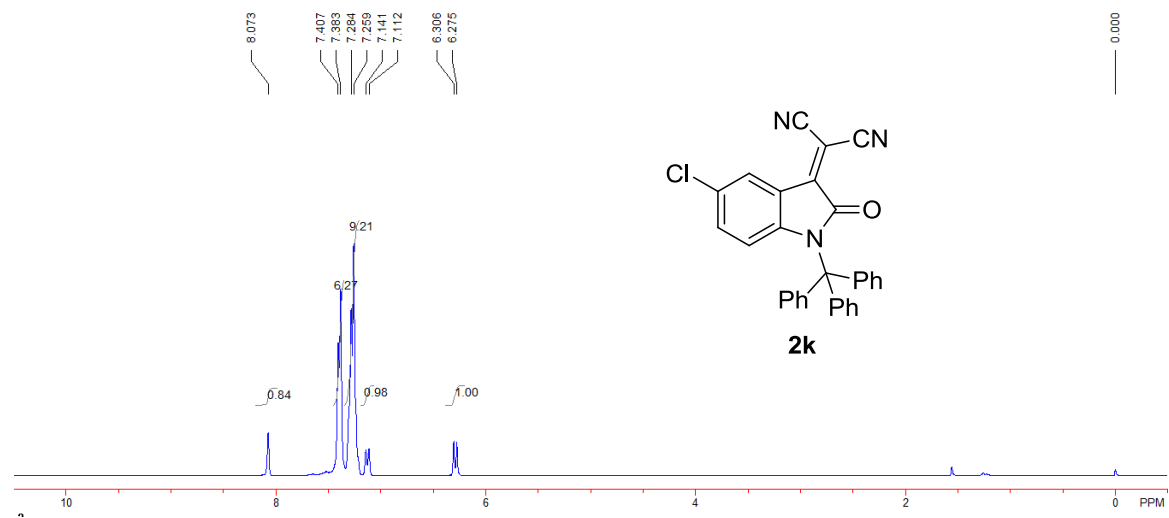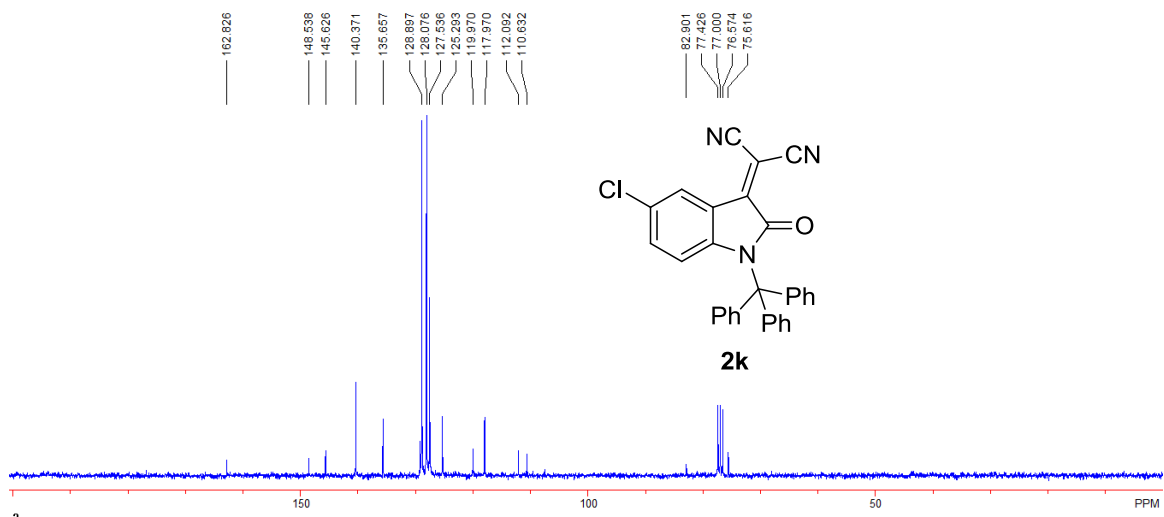

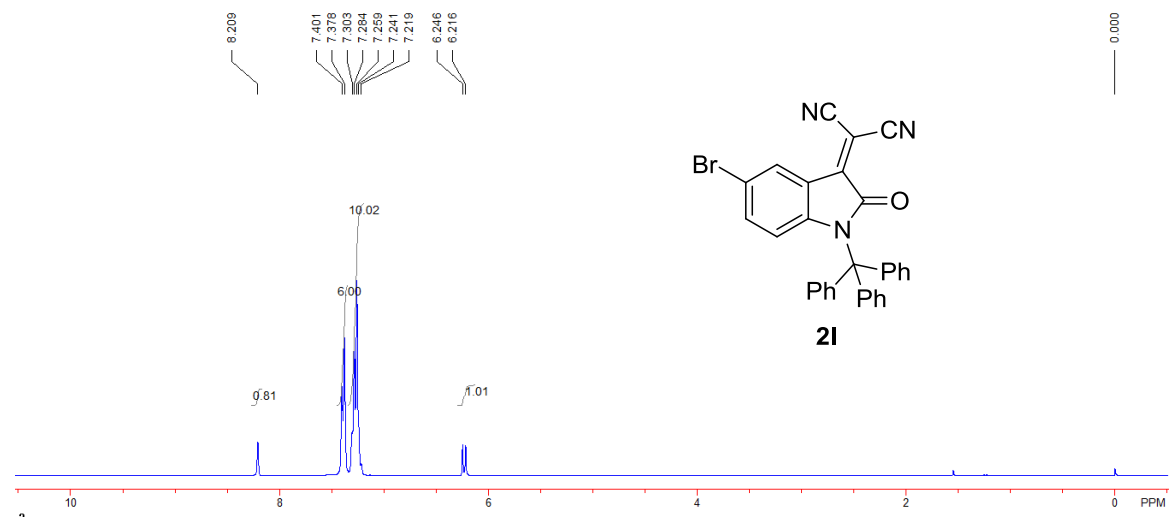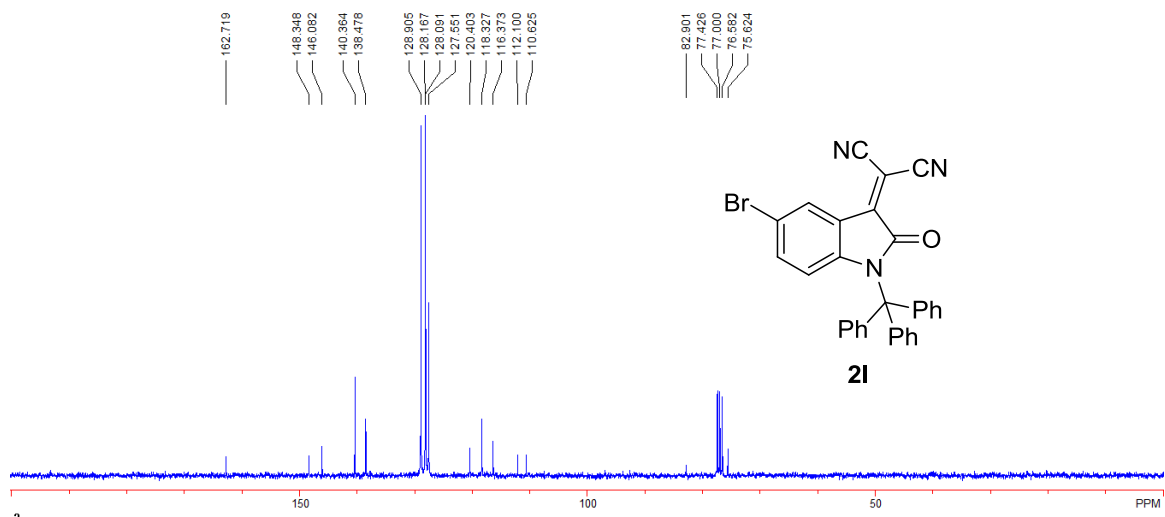

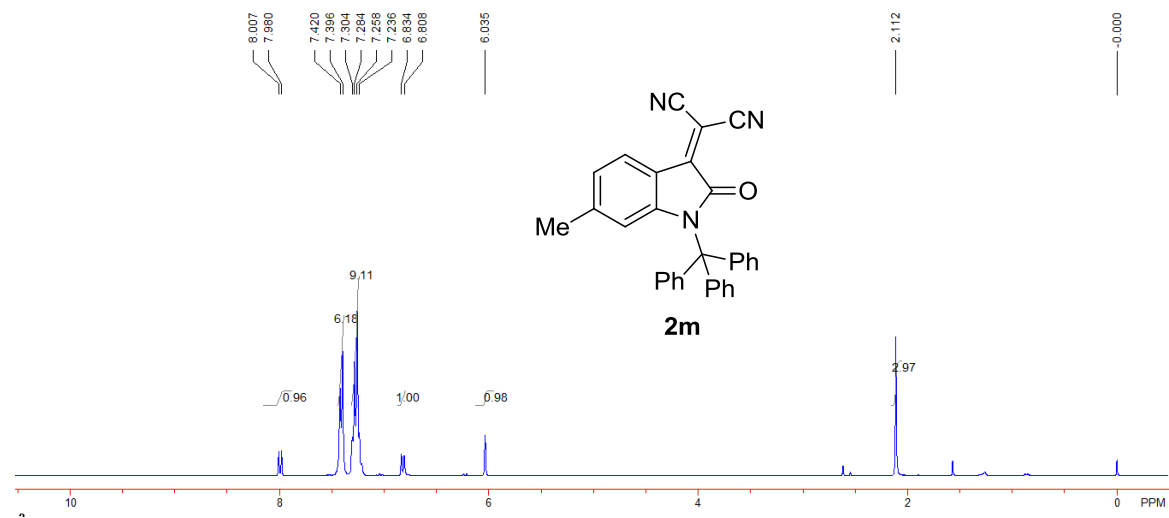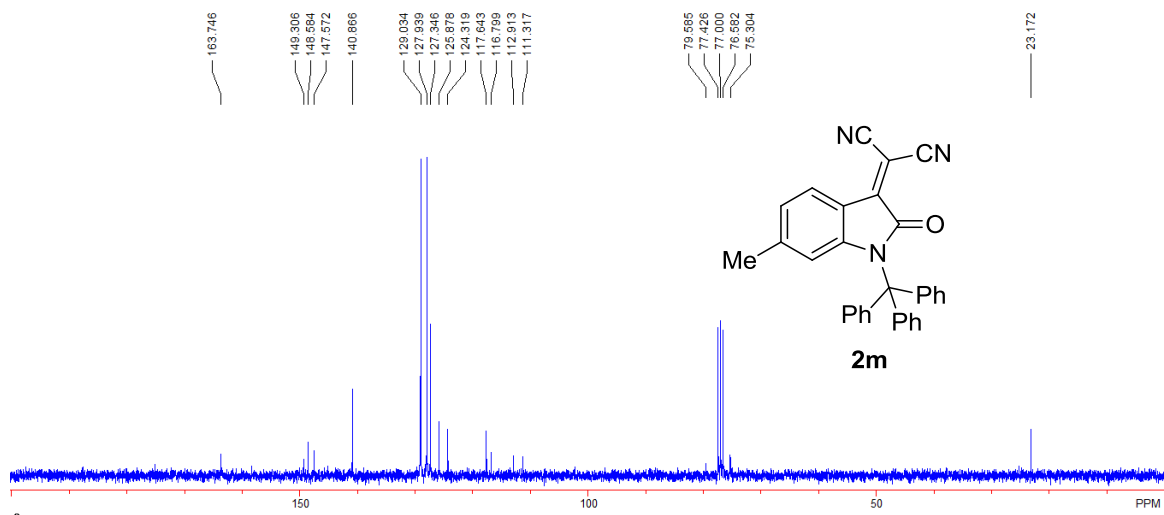

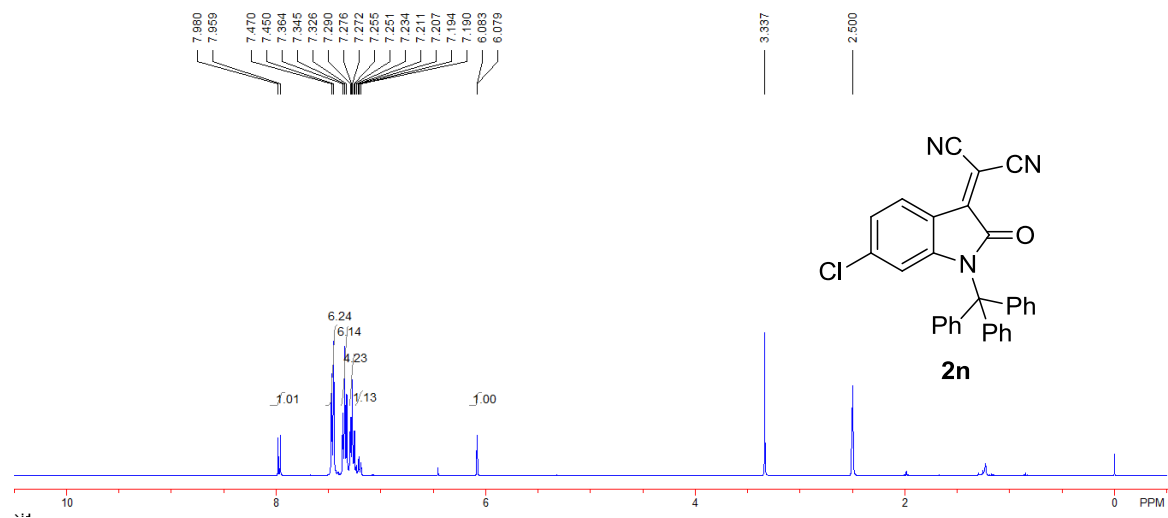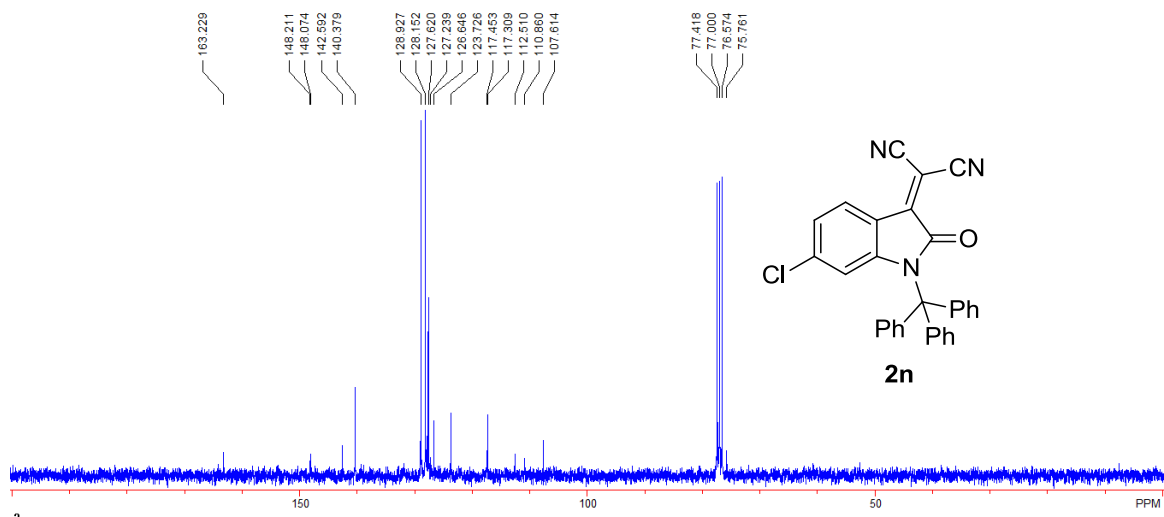

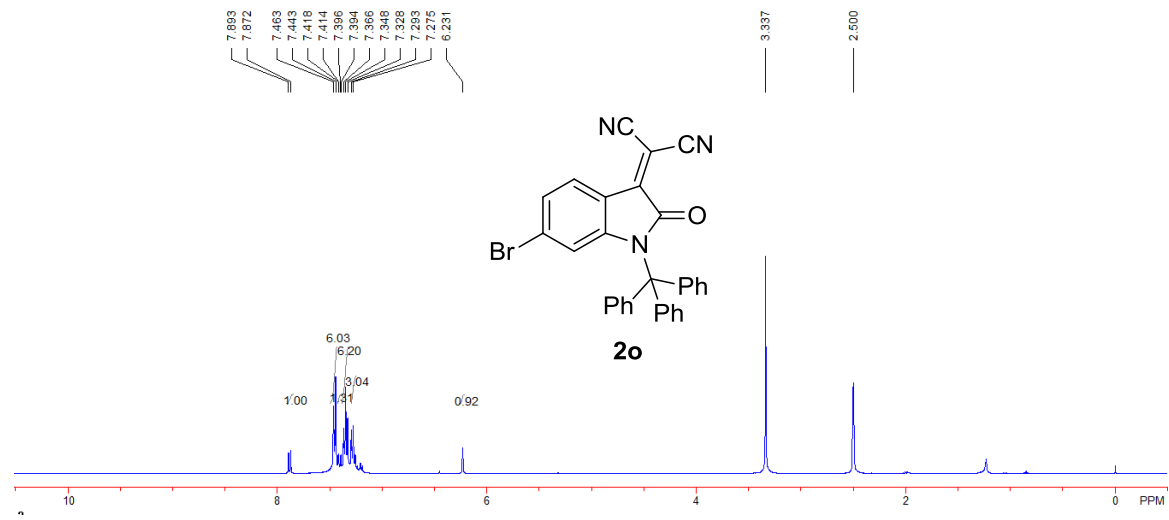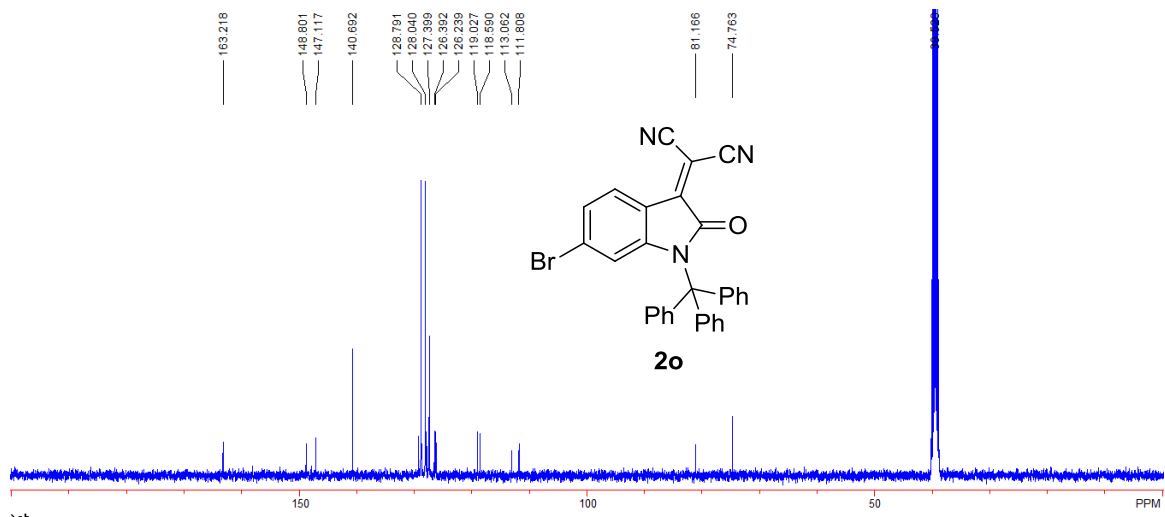

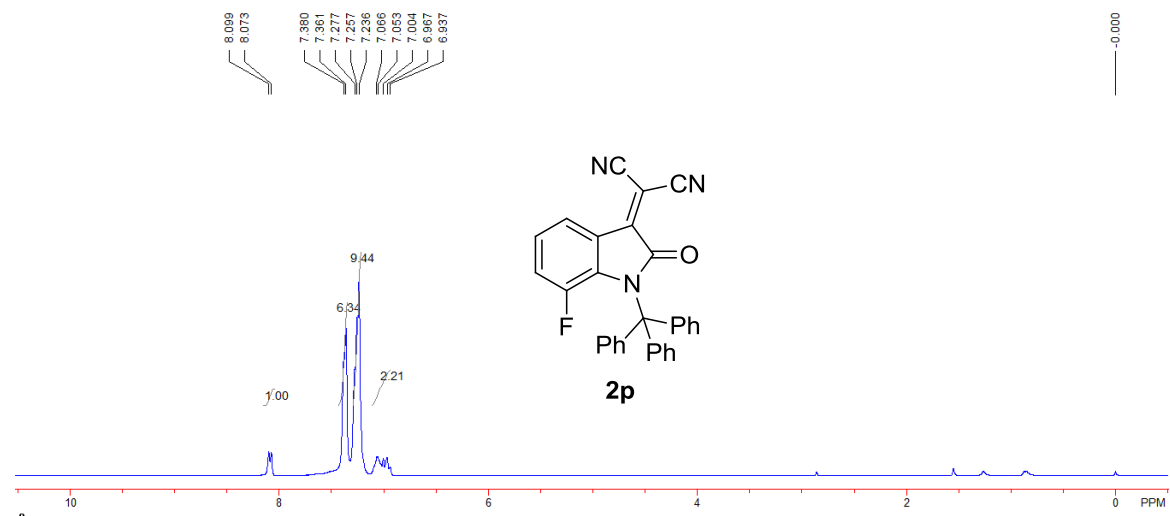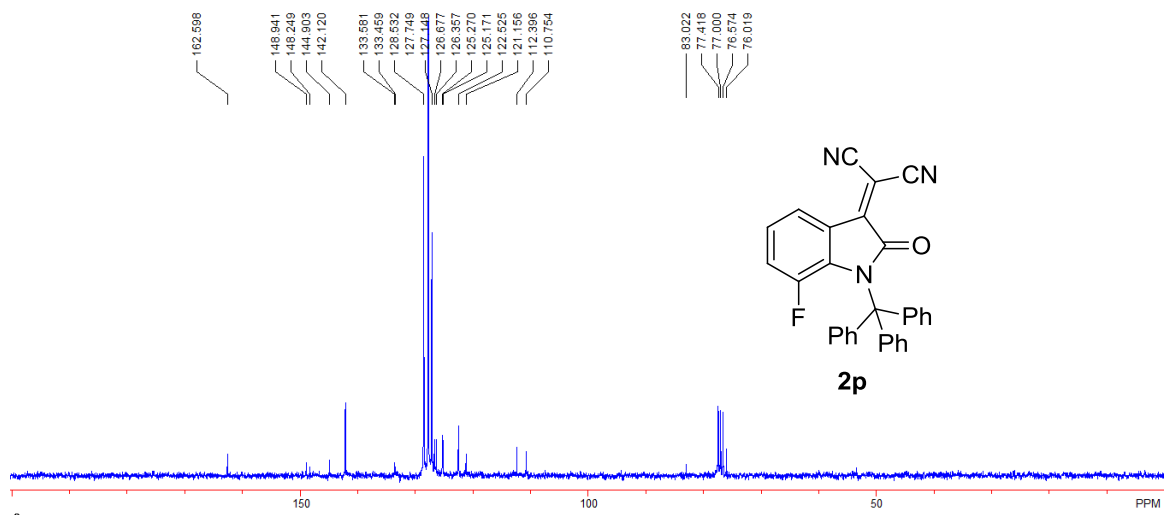



## 6. Copies of NMR Spectra of Compounds 4-6

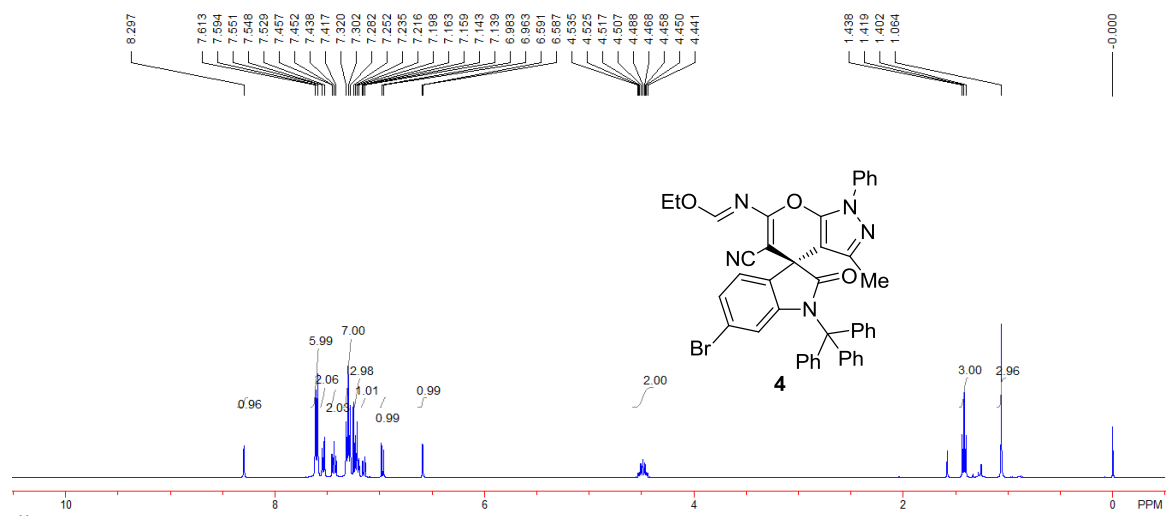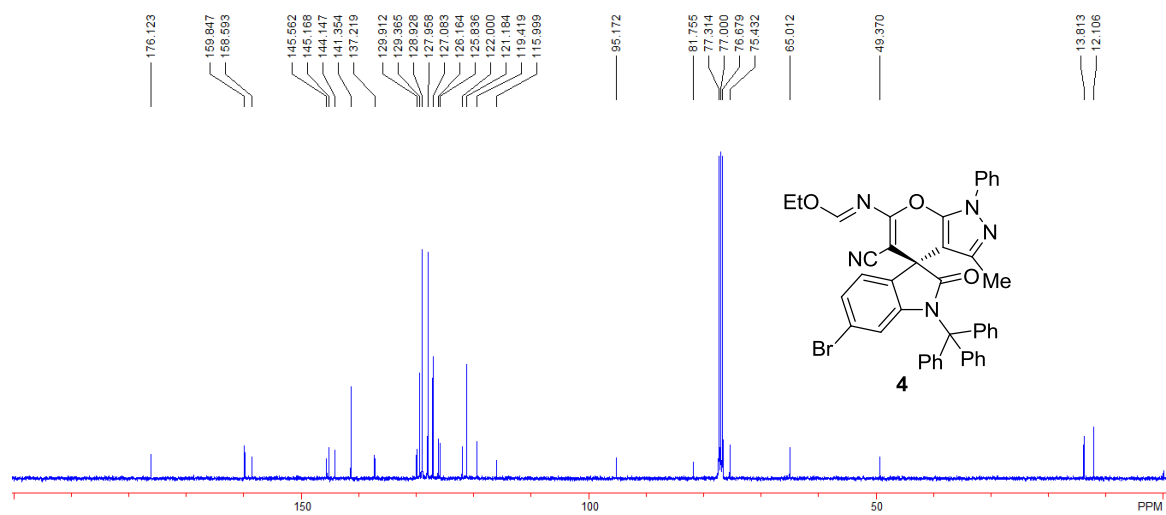

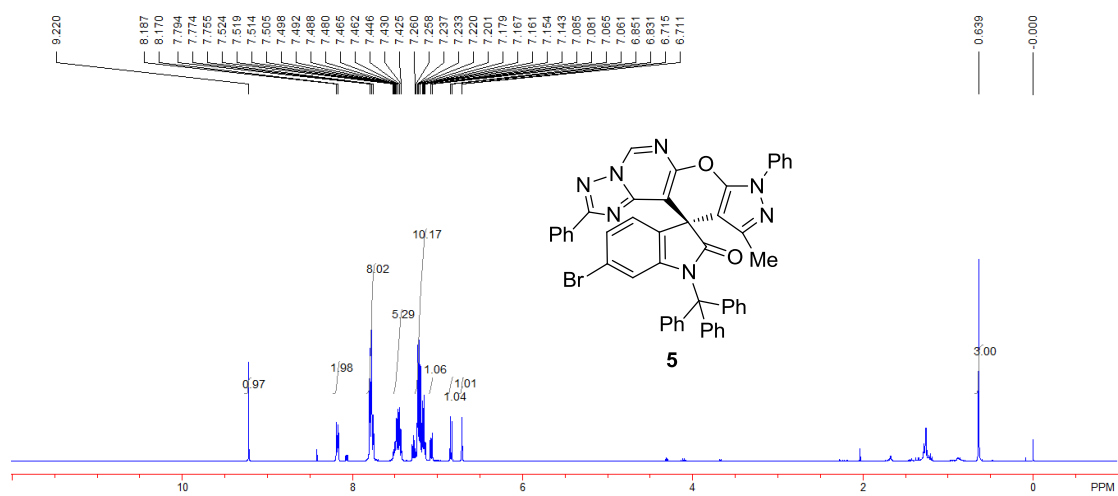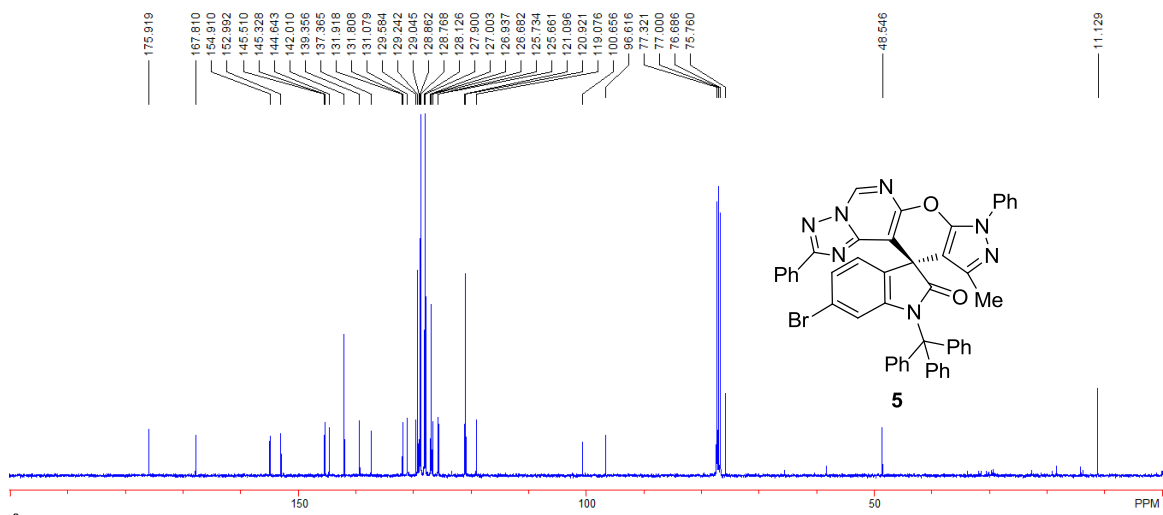

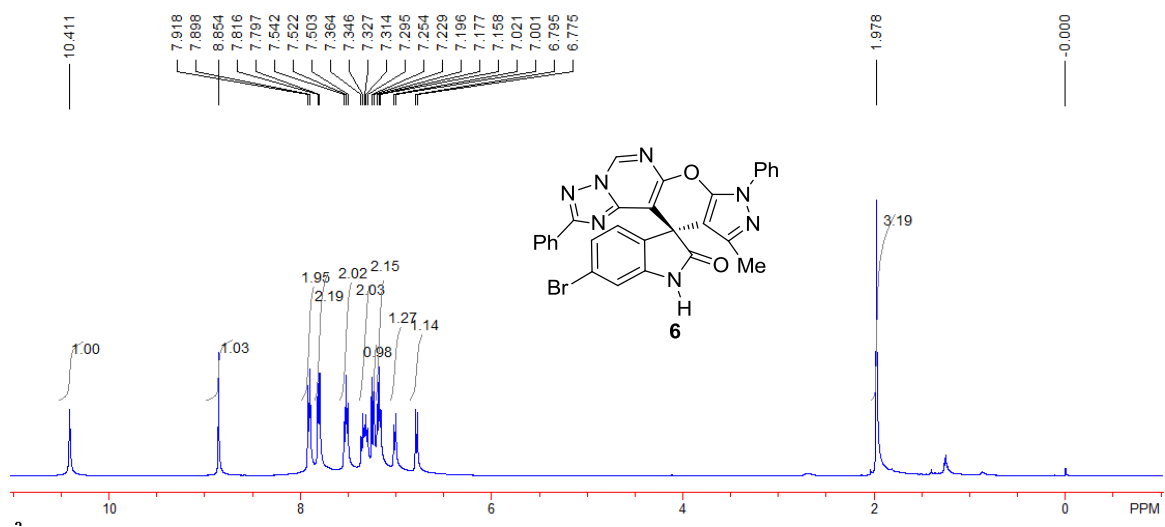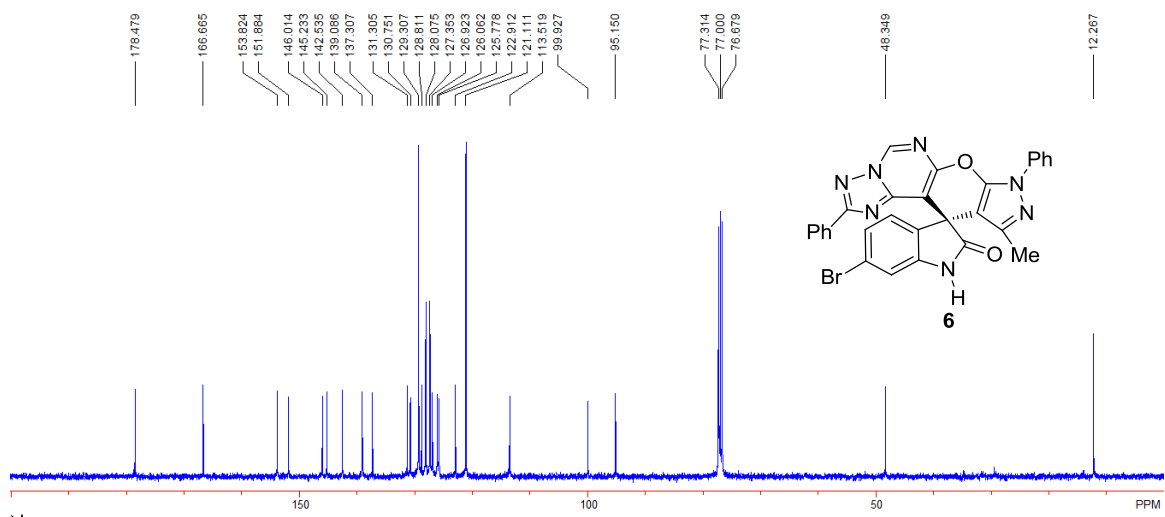

## 7. Copies of HPLC Spectra of the Products 3-6

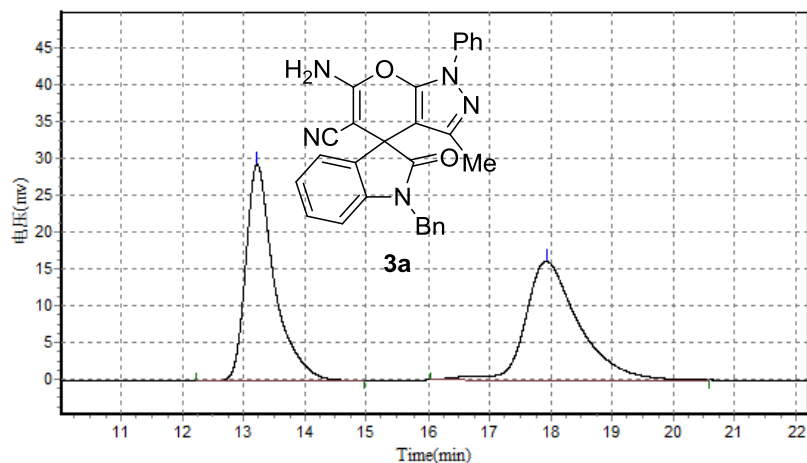

### Results

| Peak No.     | Peak ID | Ret Time | Height    | Area        | Conc.    |
|--------------|---------|----------|-----------|-------------|----------|
| 1            |         | 13.215   | 29398.352 | 948061.438  | 49.5254  |
| 2            |         | 17.920   | 16141.455 | 966233.313  | 50.4746  |
| <b>Total</b> |         |          | 45539.807 | 1914294.750 | 100.0000 |

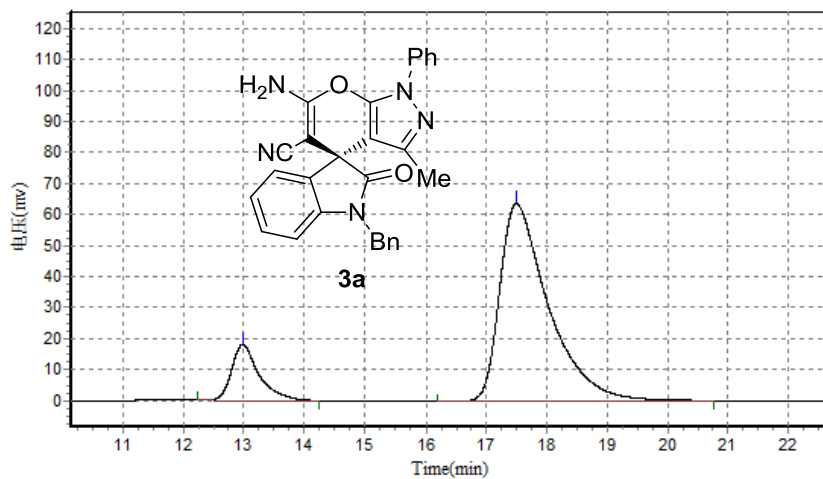

### Results

| Peak No.     | Peak ID | Ret Time | Height    | Area        | Conc.    |
|--------------|---------|----------|-----------|-------------|----------|
| 1            |         | 12.982   | 17866.266 | 559602.313  | 13.6290  |
| 2            |         | 17.493   | 63418.699 | 3546360.750 | 86.3710  |
| <b>Total</b> |         |          | 81284.965 | 4105963.063 | 100.0000 |

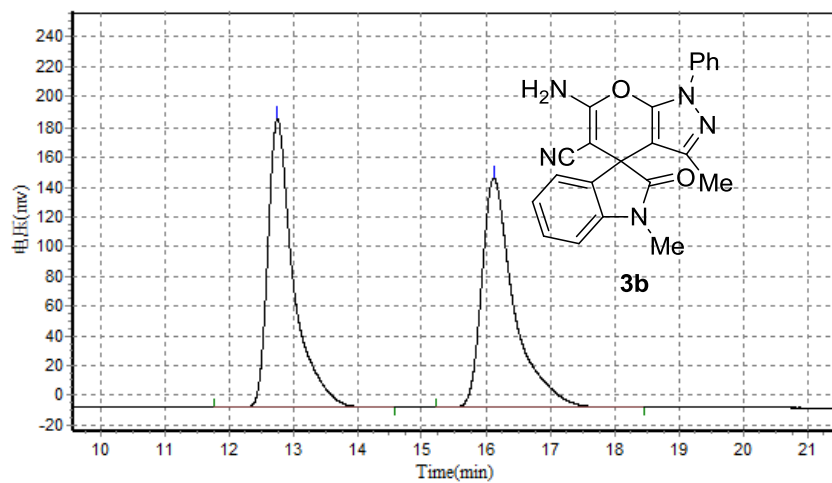

### Results

| Peak No.     | Peak ID | Ret Time | Height     | Area         | Conc.    |
|--------------|---------|----------|------------|--------------|----------|
| 1            |         | 12.752   | 193474.156 | 5336085.000  | 49.7665  |
| 2            |         | 16.107   | 154043.156 | 5386163.500  | 50.2335  |
| <b>Total</b> |         |          | 347517.313 | 10722248.500 | 100.0000 |

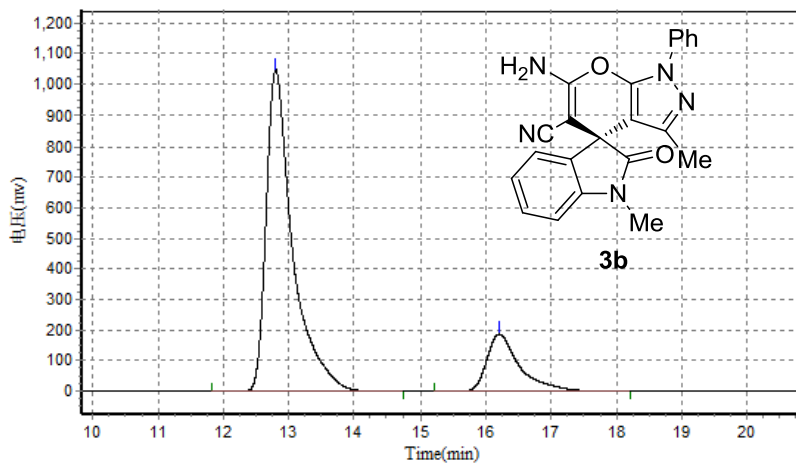

### Results

| Peak No.     | Peak ID | Ret Time | Height      | Area         | Conc.    |
|--------------|---------|----------|-------------|--------------|----------|
| 1            |         | 12.802   | 1048450.250 | 29540124.000 | 81.7248  |
| 2            |         | 16.203   | 187999.594  | 6605741.000  | 18.2752  |
| <b>Total</b> |         |          | 1236449.844 | 36145865.000 | 100.0000 |

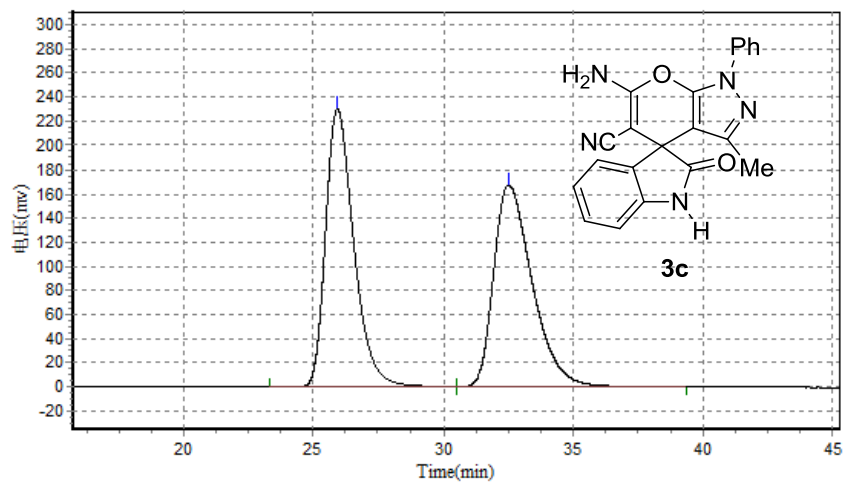

### Results

| Peak No.     | Peak ID | Ret Time | Height     | Area         | Conc.    |
|--------------|---------|----------|------------|--------------|----------|
| 1            |         | 25.928   | 230979.734 | 17436902.000 | 50.0493  |
| 2            |         | 32.493   | 168336.797 | 17402566.000 | 49.9507  |
| <b>Total</b> |         |          | 399316.531 | 34839468.000 | 100.0000 |

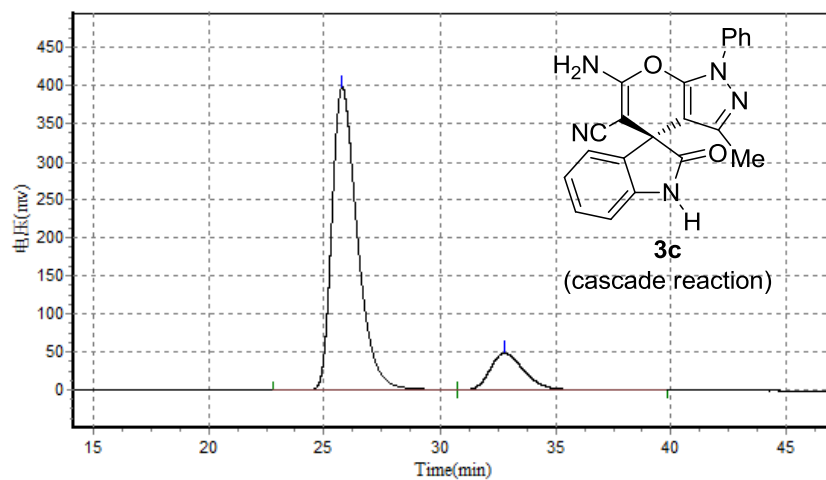

### Results

| Peak No.     | Peak ID | Ret Time | Height     | Area         | Conc.    |
|--------------|---------|----------|------------|--------------|----------|
| 1            |         | 25.788   | 397743.531 | 30526372.000 | 85.1202  |
| 2            |         | 32.782   | 49210.301  | 5336307.000  | 14.8798  |
| <b>Total</b> |         |          | 446953.832 | 35862679.000 | 100.0000 |

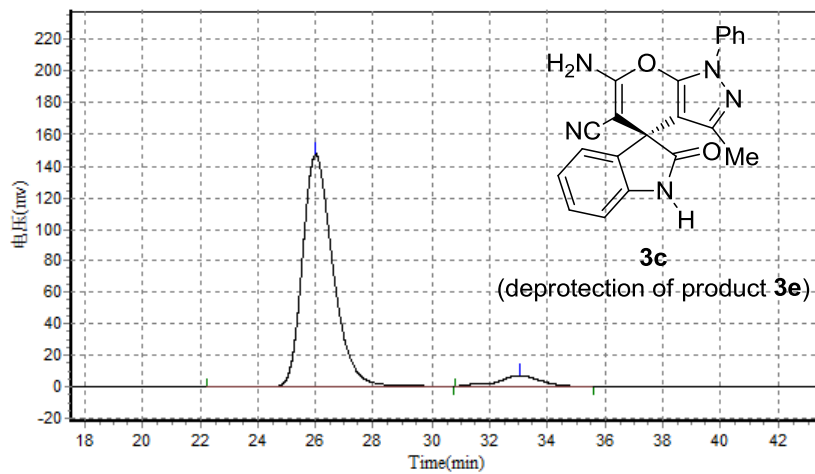

### Results

| Peak No.     | Peak ID | Ret Time | Height     | Area         | Conc.    |
|--------------|---------|----------|------------|--------------|----------|
| 1            |         | 25.998   | 147409.844 | 10851318.000 | 93.6468  |
| 2            |         | 33.022   | 6925.049   | 736175.375   | 6.3532   |
| <b>Total</b> |         |          | 154334.893 | 11587493.375 | 100.0000 |

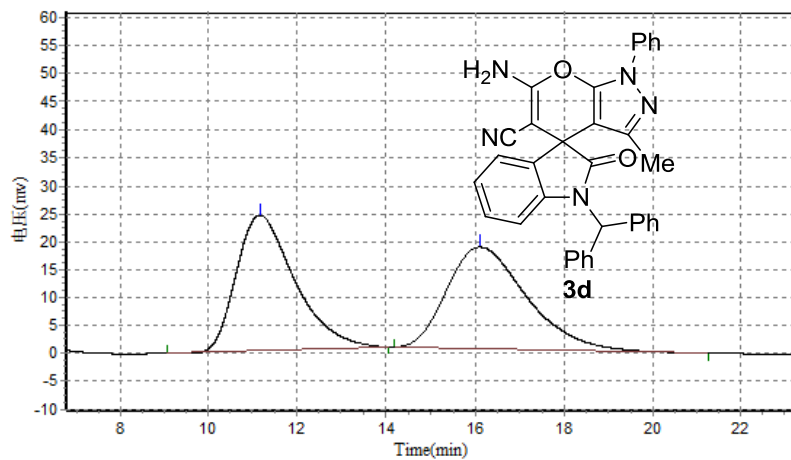

### Results

| Peak No.     | Peak ID | Ret Time | Height    | Area        | Conc.    |
|--------------|---------|----------|-----------|-------------|----------|
| 1            |         | 11.153   | 24229.164 | 2229062.500 | 49.4497  |
| 2            |         | 16.103   | 18234.375 | 2278673.000 | 50.5503  |
| <b>Total</b> |         |          | 42463.539 | 4507735.500 | 100.0000 |

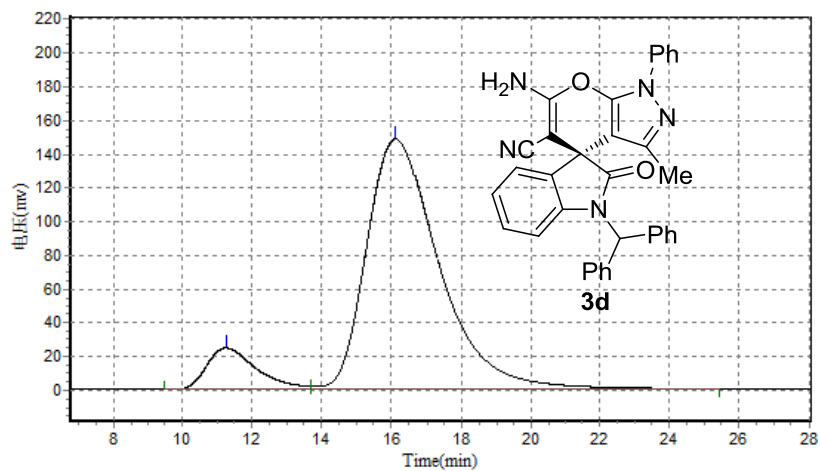

### Results

| Peak No.     | Peak ID | Ret Time | Height     | Area         | Conc.    |
|--------------|---------|----------|------------|--------------|----------|
| 1            |         | 11.255   | 24556.166  | 2432425.250  | 10.2320  |
| 2            |         | 16.135   | 148199.188 | 21340214.000 | 89.7680  |
| <b>Total</b> |         |          | 172755.354 | 23772639.250 | 100.0000 |



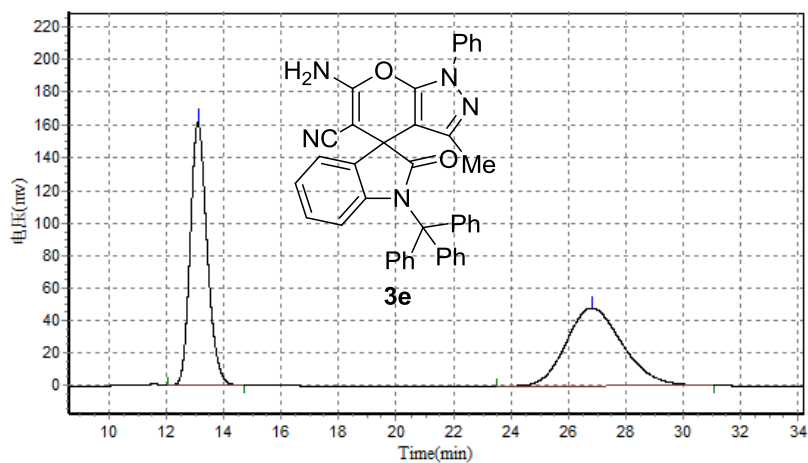

### Results

| Peak No.     | Peak ID | Ret Time | Height     | Area         | Conc.    |
|--------------|---------|----------|------------|--------------|----------|
| 1            |         | 13.117   | 161876.297 | 6598503.500  | 50.3424  |
| 2            |         | 26.817   | 47898.715  | 6508754.500  | 49.6576  |
| <b>Total</b> |         |          | 209775.012 | 13107258.000 | 100.0000 |

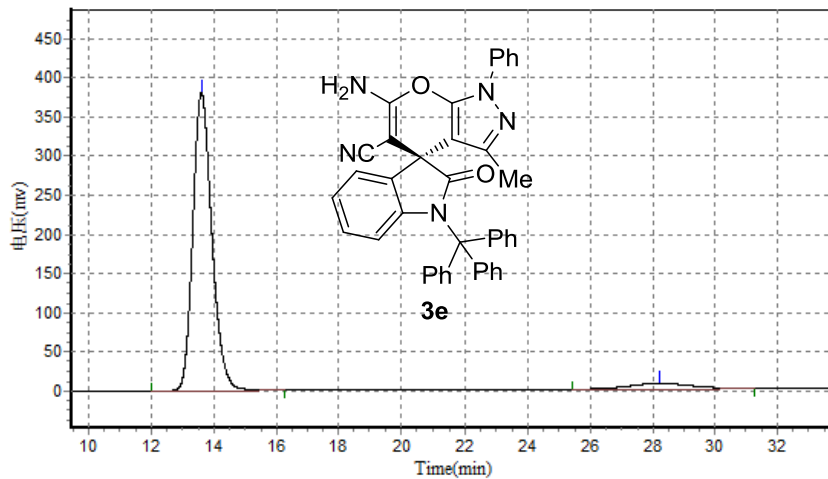

### Results

| Peak No.     | Peak ID | Ret Time | Height     | Area         | Conc.    |
|--------------|---------|----------|------------|--------------|----------|
| 1            |         | 13.607   | 380218.781 | 16011022.000 | 94.3866  |
| 2            |         | 28.217   | 6963.194   | 952217.125   | 5.6134   |
| <b>Total</b> |         |          | 387181.976 | 16963239.125 | 100.0000 |

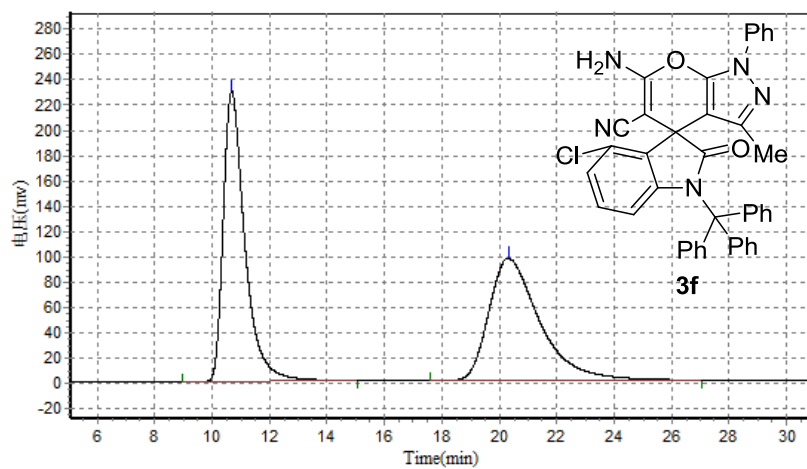

### Results

| Peak No.     | Peak ID | Ret Time | Height     | Area         | Conc.    |
|--------------|---------|----------|------------|--------------|----------|
| 1            |         | 10.687   | 228566.203 | 11998230.000 | 50.2430  |
| 2            |         | 20.313   | 96267.781  | 11882179.000 | 49.7570  |
| <b>Total</b> |         |          | 324833.984 | 23880409.000 | 100.0000 |

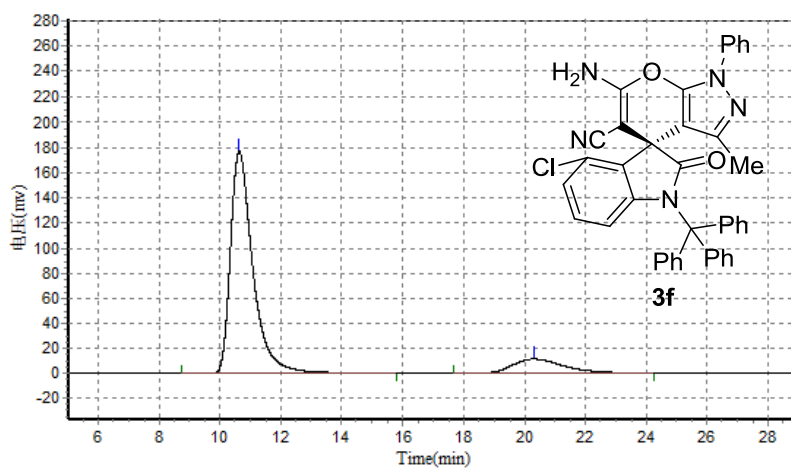

### Results

| Peak No.     | Peak ID | Ret Time | Height     | Area         | Conc.    |
|--------------|---------|----------|------------|--------------|----------|
| 1            |         | 10.638   | 177125.063 | 9102100.000  | 86.9193  |
| 2            |         | 20.308   | 11473.305  | 1369799.375  | 13.0807  |
| <b>Total</b> |         |          | 188598.367 | 10471899.375 | 100.0000 |

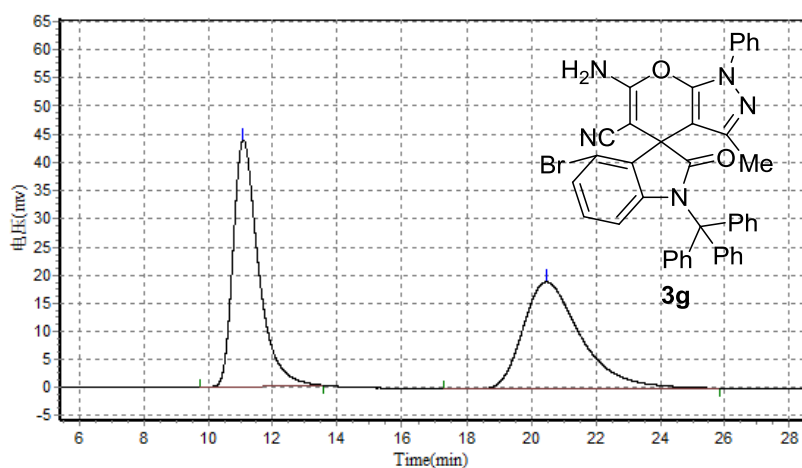

### Results

| Peak No.     | Peak ID | Ret Time | Height    | Area        | Conc.    |
|--------------|---------|----------|-----------|-------------|----------|
| 1            |         | 11.090   | 43940.750 | 2395284.750 | 50.2664  |
| 2            |         | 20.460   | 19044.061 | 2369893.000 | 49.7336  |
| <b>Total</b> |         |          | 62984.811 | 4765177.750 | 100.0000 |

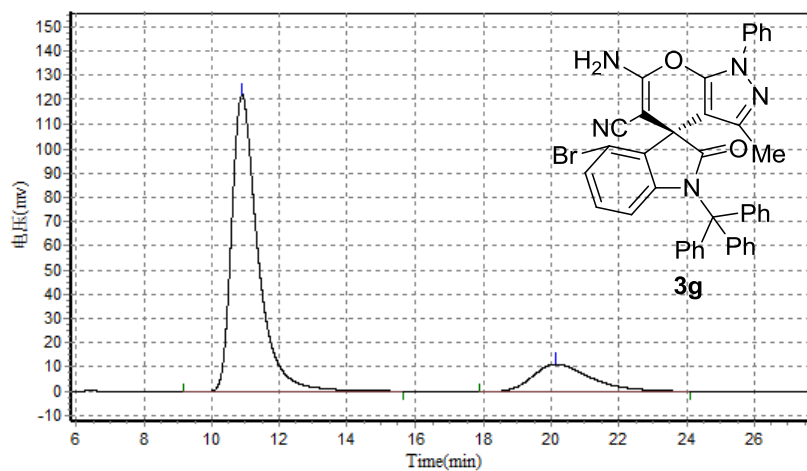

### Results

| Peak No.     | Peak ID | Ret Time | Height     | Area        | Conc.    |
|--------------|---------|----------|------------|-------------|----------|
| 1            |         | 10.893   | 121963.195 | 6552413.500 | 83.0525  |
| 2            |         | 20.143   | 11268.212  | 1337066.625 | 16.9475  |
| <b>Total</b> |         |          | 133231.407 | 7889480.125 | 100.0000 |

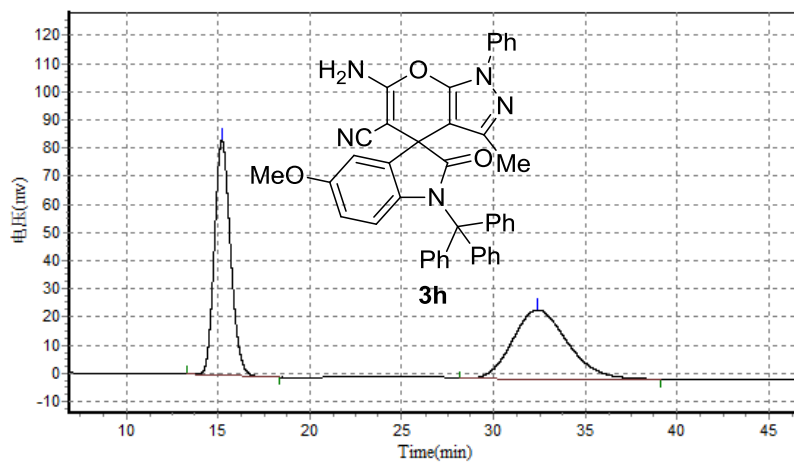

### Results

| Peak No.     | Peak ID | Ret Time | Height     | Area         | Conc.    |
|--------------|---------|----------|------------|--------------|----------|
| 1            |         | 15.220   | 83493.469  | 5080126.000  | 50.3593  |
| 2            |         | 32.365   | 24360.365  | 5007645.000  | 49.6407  |
| <b>Total</b> |         |          | 107853.834 | 10087771.000 | 100.0000 |

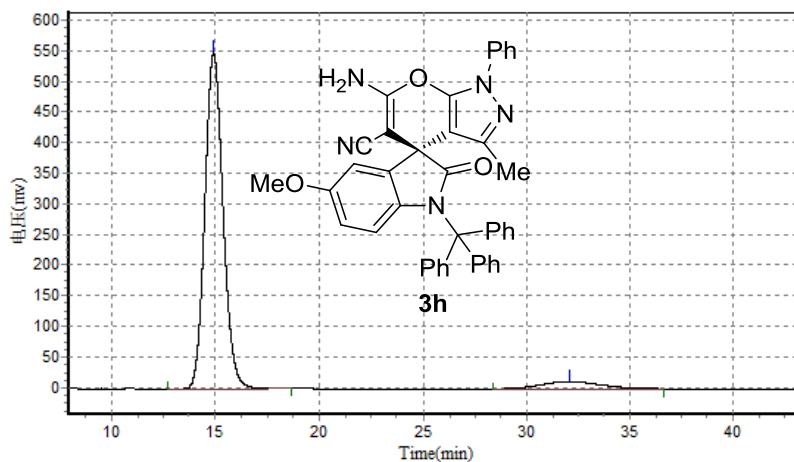

### Results

| Peak No.     | Peak ID | Ret Time | Height     | Area         | Conc.    |
|--------------|---------|----------|------------|--------------|----------|
| 1            |         | 14.903   | 548680.188 | 33522758.000 | 93.4823  |
| 2            |         | 32.070   | 11669.442  | 2337250.500  | 6.5177   |
| <b>Total</b> |         |          | 560349.630 | 35860008.500 | 100.0000 |

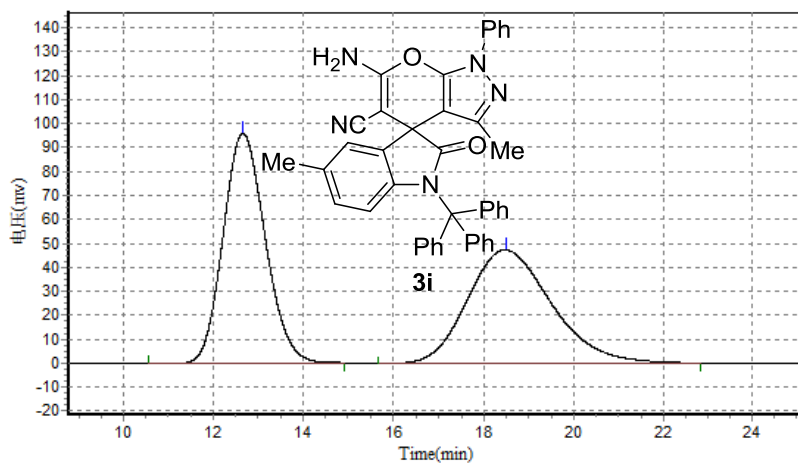

### Results

| Peak No.     | Peak ID | Ret Time | Height     | Area         | Conc.    |
|--------------|---------|----------|------------|--------------|----------|
| 1            |         | 12.655   | 96079.391  | 6265504.000  | 50.4283  |
| 2            |         | 18.485   | 47381.934  | 6159073.000  | 49.5717  |
| <b>Total</b> |         |          | 143461.324 | 12424577.000 | 100.0000 |

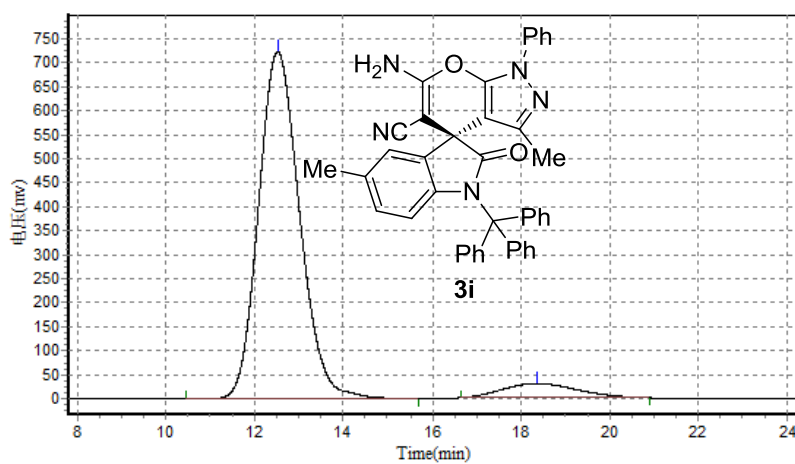

### Results

| Peak No.     | Peak ID | Ret Time | Height     | Area         | Conc.    |
|--------------|---------|----------|------------|--------------|----------|
| 1            |         | 12.525   | 722871.875 | 46492300.000 | 93.0241  |
| 2            |         | 18.355   | 29609.029  | 3486480.000  | 6.9759   |
| <b>Total</b> |         |          | 752480.904 | 49978780.000 | 100.0000 |

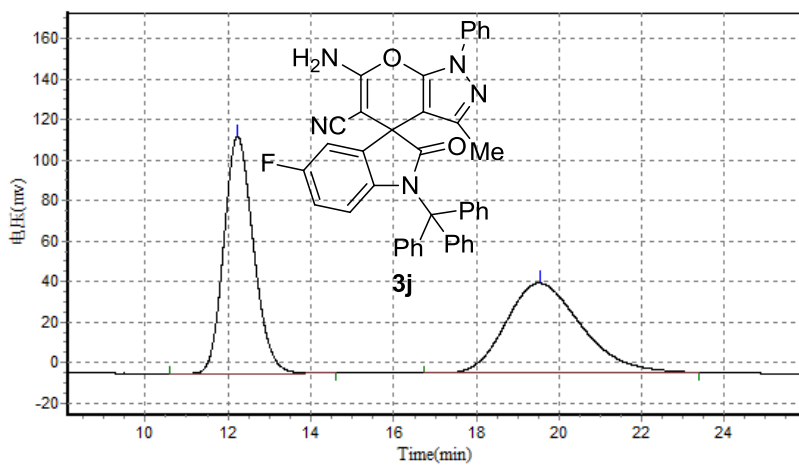

### Results

| Peak No.     | Peak ID | Ret Time | Height     | Area         | Conc.    |
|--------------|---------|----------|------------|--------------|----------|
| 1            |         | 12.238   | 117178.258 | 5836971.000  | 50.9010  |
| 2            |         | 19.532   | 44374.809  | 5630325.000  | 49.0990  |
| <b>Total</b> |         |          | 161553.066 | 11467296.000 | 100.0000 |

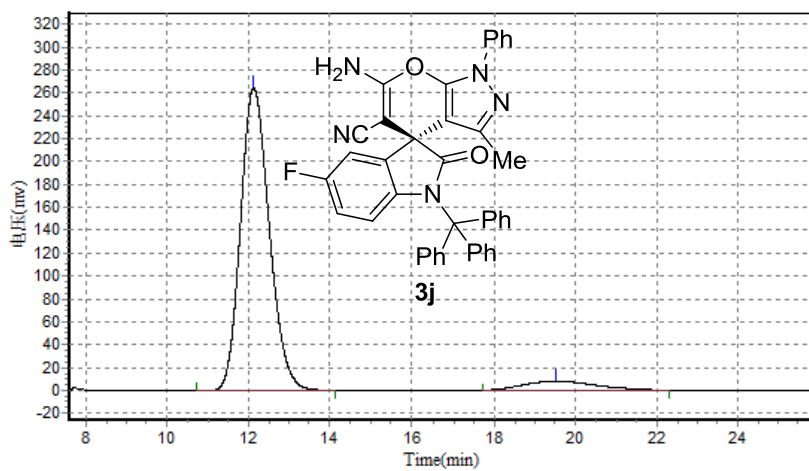

### Results

| Peak No.     | Peak ID | Ret Time | Height     | Area         | Conc.    |
|--------------|---------|----------|------------|--------------|----------|
| 1            |         | 12.127   | 264565.031 | 12983120.000 | 92.9136  |
| 2            |         | 19.530   | 7912.599   | 990211.125   | 7.0864   |
| <b>Total</b> |         |          | 272477.630 | 13973331.125 | 100.0000 |

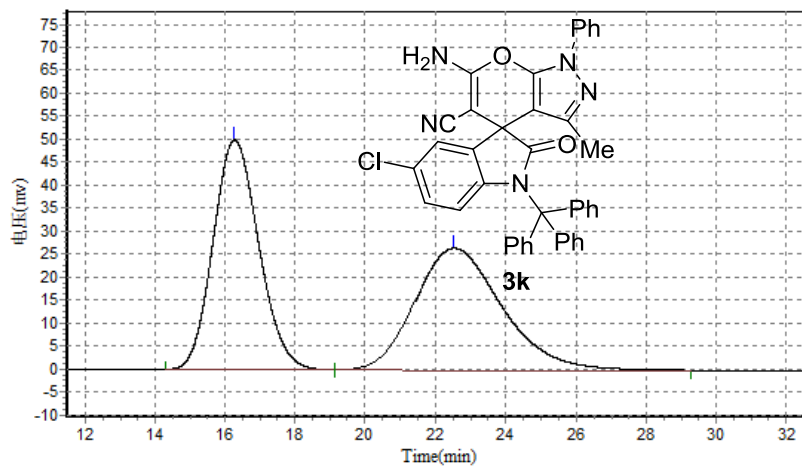

### Results

| Peak No.     | Peak ID | Ret Time | Height    | Area        | Conc.    |
|--------------|---------|----------|-----------|-------------|----------|
| 1            |         | 16.265   | 49854.809 | 4506595.000 | 49.8633  |
| 2            |         | 22.505   | 26408.949 | 4531296.000 | 50.1367  |
| <b>Total</b> |         |          | 76263.758 | 9037891.000 | 100.0000 |

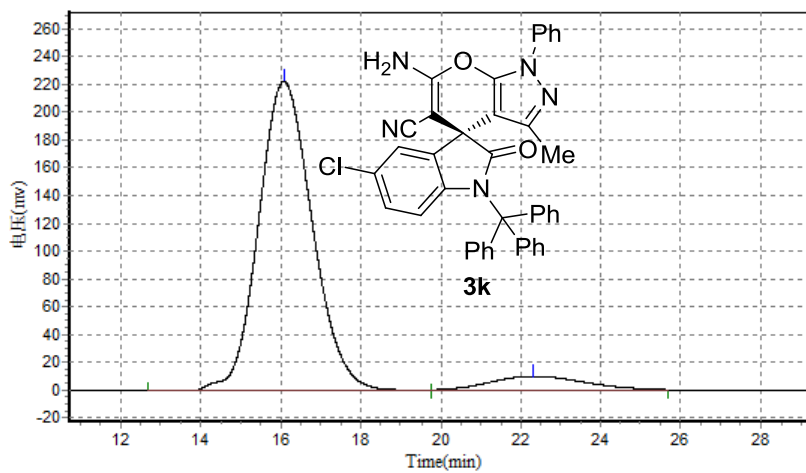

### Results

| Peak No.     | Peak ID | Ret Time | Height     | Area         | Conc.    |
|--------------|---------|----------|------------|--------------|----------|
| 1            |         | 16.077   | 221857.469 | 20695688.000 | 92.8411  |
| 2            |         | 22.283   | 9855.474   | 1595829.875  | 7.1589   |
| <b>Total</b> |         |          | 231712.942 | 22291517.875 | 100.0000 |

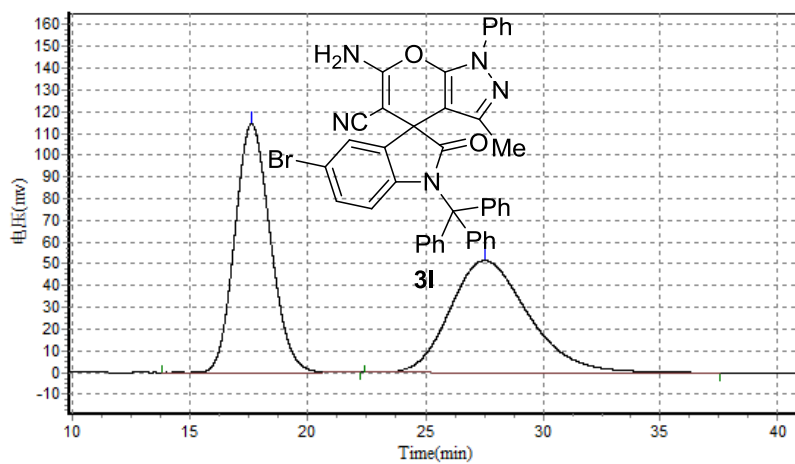

### Results

| Peak No.     | Peak ID | Ret Time | Height     | Area         | Conc.    |
|--------------|---------|----------|------------|--------------|----------|
| 1            |         | 17.623   | 114371.641 | 12030132.000 | 50.1790  |
| 2            |         | 27.503   | 51531.730  | 11944315.000 | 49.8210  |
| <b>Total</b> |         |          | 165903.371 | 23974447.000 | 100.0000 |

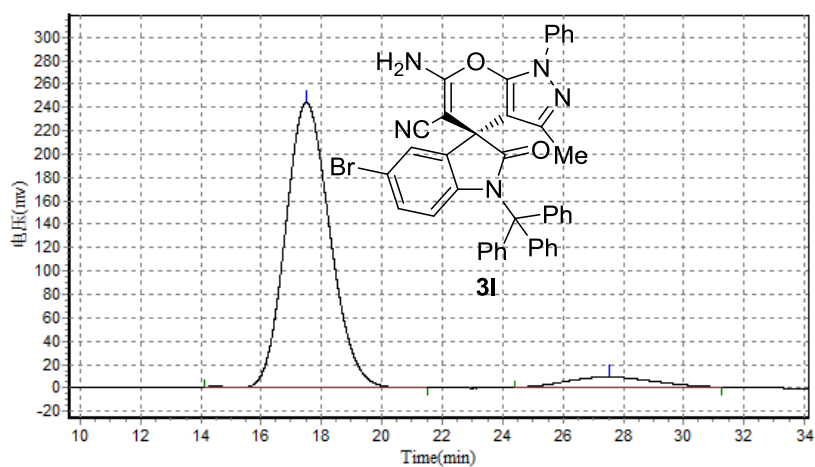

### Results

| Peak No.     | Peak ID | Ret Time | Height     | Area         | Conc.    |
|--------------|---------|----------|------------|--------------|----------|
| 1            |         | 17.508   | 244467.438 | 25037932.000 | 93.3628  |
| 2            |         | 27.527   | 8779.376   | 1779949.000  | 6.6372   |
| <b>Total</b> |         |          | 253246.813 | 26817881.000 | 100.0000 |



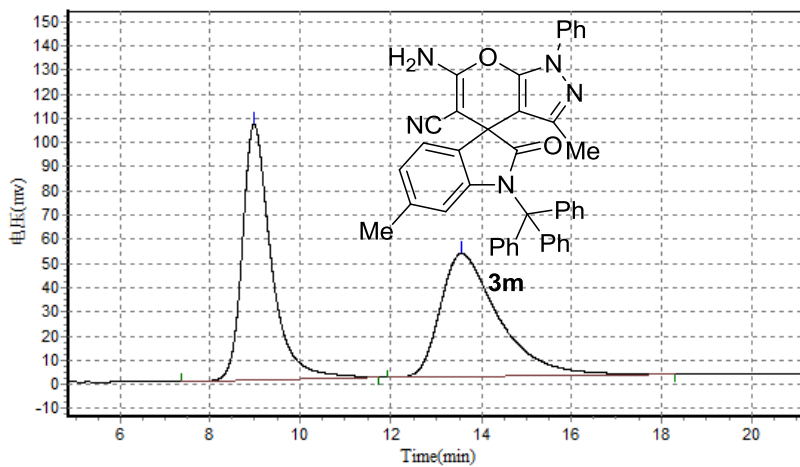

### Results

| Peak No.     | Peak ID | Ret Time | Height     | Area        | Conc.    |
|--------------|---------|----------|------------|-------------|----------|
| 1            |         | 8.978    | 105580.281 | 4661290.500 | 50.6485  |
| 2            |         | 13.553   | 50718.289  | 4541934.000 | 49.3516  |
| <b>Total</b> |         |          | 156298.570 | 9203224.500 | 100.0000 |

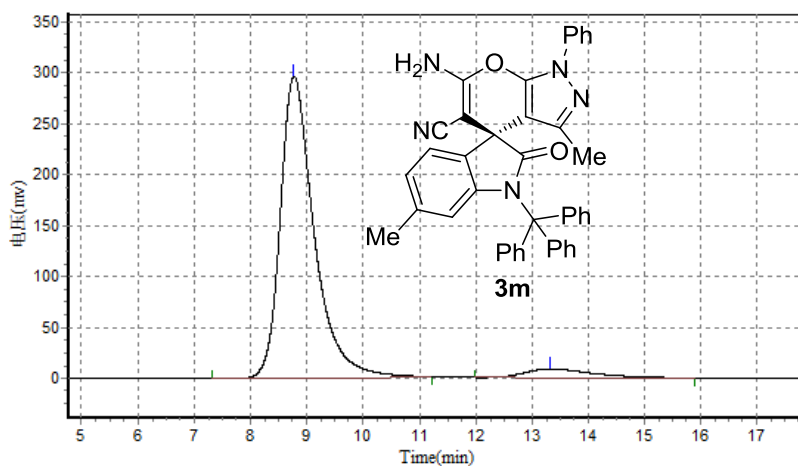

### Results

| Peak No.     | Peak ID | Ret Time | Height     | Area         | Conc.    |
|--------------|---------|----------|------------|--------------|----------|
| 1            |         | 8.780    | 295990.125 | 12340196.000 | 94.5615  |
| 2            |         | 13.318   | 8598.358   | 709716.875   | 5.4385   |
| <b>Total</b> |         |          | 304588.483 | 13049912.875 | 100.0000 |

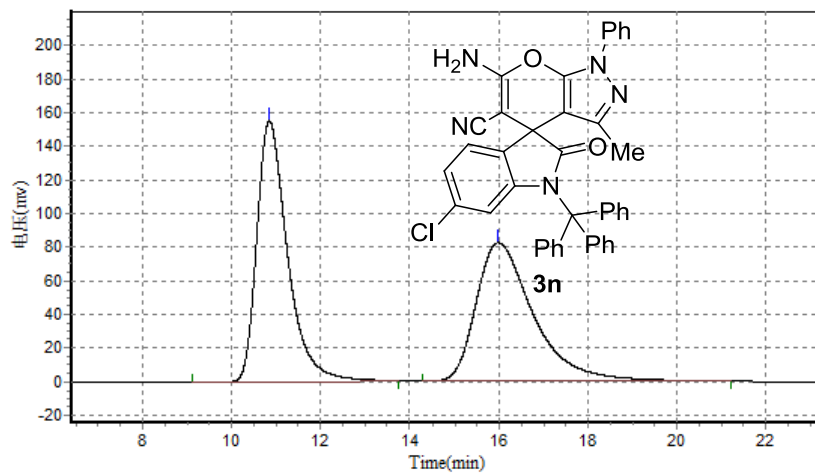

### Results

| Peak No.     | Peak ID | Ret Time | Height     | Area         | Conc.    |
|--------------|---------|----------|------------|--------------|----------|
| 1            |         | 10.855   | 154879.750 | 7402522.000  | 50.1323  |
| 2            |         | 15.983   | 82273.047  | 7363449.000  | 49.8677  |
| <b>Total</b> |         |          | 237152.797 | 14765971.000 | 100.0000 |

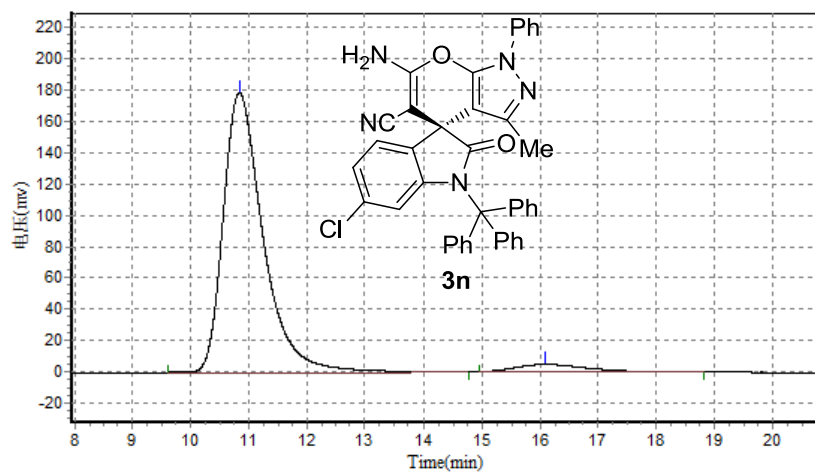

### Results

| Peak No.     | Peak ID | Ret Time | Height     | Area        | Conc.    |
|--------------|---------|----------|------------|-------------|----------|
| 1            |         | 10.840   | 178048.031 | 8499101.000 | 95.4226  |
| 2            |         | 16.078   | 4767.599   | 407699.406  | 4.5774   |
| <b>Total</b> |         |          | 182815.630 | 8906800.406 | 100.0000 |

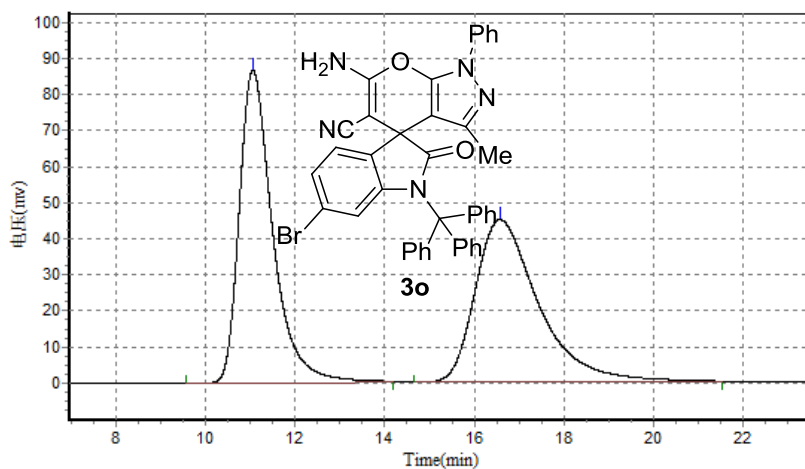

### Results

| Peak No.     | Peak ID | Ret Time | Height     | Area        | Conc.    |
|--------------|---------|----------|------------|-------------|----------|
| 1            |         | 11.058   | 86584.563  | 4468051.000 | 50.4660  |
| 2            |         | 16.552   | 44847.074  | 4385529.000 | 49.5340  |
| <b>Total</b> |         |          | 131431.637 | 8853580.000 | 100.0000 |

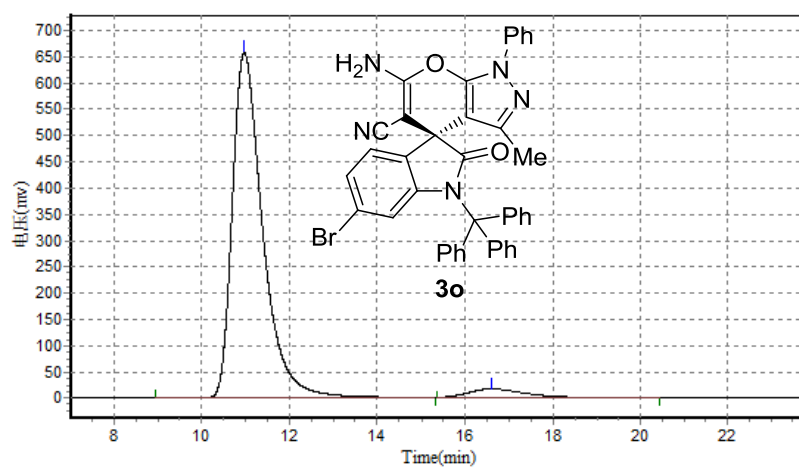

### Results

| Peak No.     | Peak ID | Ret Time | Height     | Area         | Conc.    |
|--------------|---------|----------|------------|--------------|----------|
| 1            |         | 10.977   | 656811.250 | 31713452.000 | 95.4779  |
| 2            |         | 16.600   | 16548.471  | 1502030.875  | 4.5221   |
| <b>Total</b> |         |          | 673359.721 | 33215482.875 | 100.0000 |

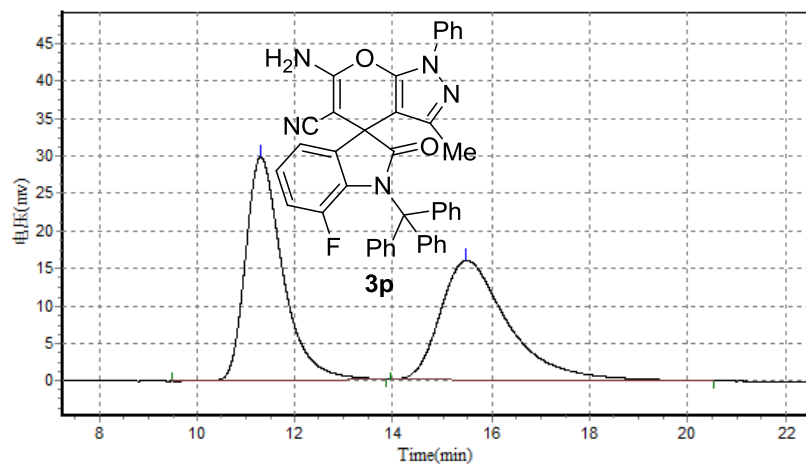

### Results

| Peak No.     | Peak ID | Ret Time | Height    | Area        | Conc.    |
|--------------|---------|----------|-----------|-------------|----------|
| 1            |         | 11.302   | 29807.932 | 1563996.125 | 50.6474  |
| 2            |         | 15.475   | 15909.587 | 1524011.250 | 49.3526  |
| <b>Total</b> |         |          | 45717.519 | 3088007.375 | 100.0000 |

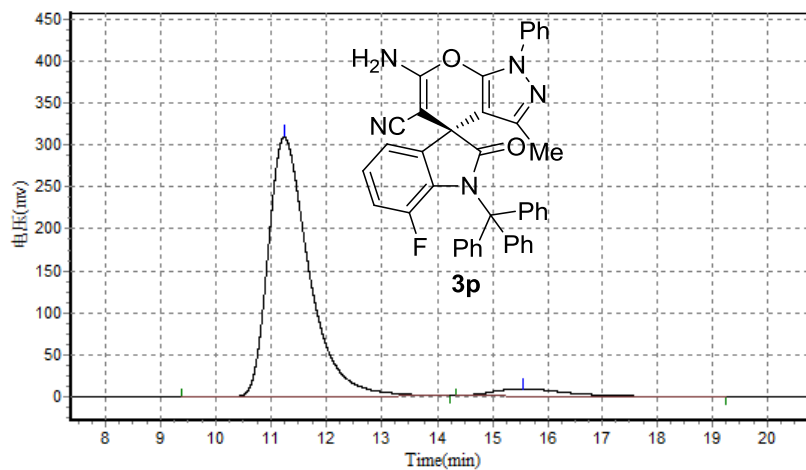

### Results

| Peak No.     | Peak ID | Ret Time | Height     | Area         | Conc.    |
|--------------|---------|----------|------------|--------------|----------|
| 1            |         | 11.245   | 308388.906 | 15821498.000 | 95.4276  |
| 2            |         | 15.540   | 8534.312   | 758086.563   | 4.5724   |
| <b>Total</b> |         |          | 316923.218 | 16579584.563 | 100.0000 |

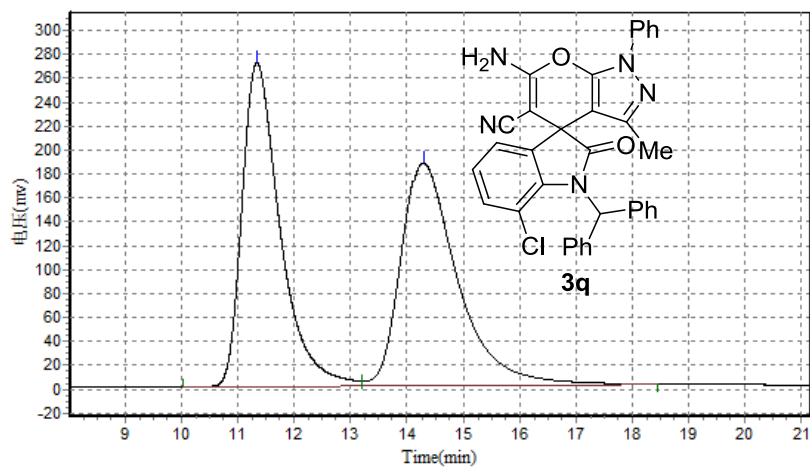

### Results

| Peak No.     | Peak ID | Ret Time | Height     | Area         | Conc.    |
|--------------|---------|----------|------------|--------------|----------|
| 1            |         | 11.345   | 269823.719 | 12659516.000 | 49.6670  |
| 2            |         | 14.278   | 185822.766 | 12829261.000 | 50.3330  |
| <b>Total</b> |         |          | 455646.484 | 25488777.000 | 100.0000 |

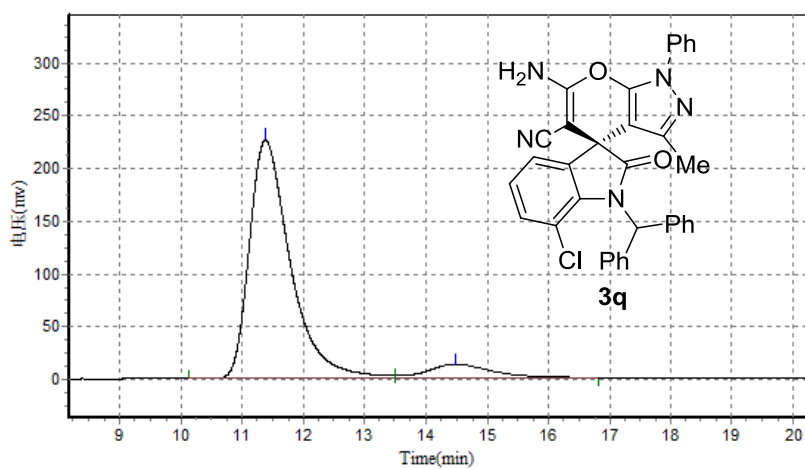

### Results

| Peak No.     | Peak ID | Ret Time | Height     | Area         | Conc.    |
|--------------|---------|----------|------------|--------------|----------|
| 1            |         | 11.383   | 225990.063 | 10562122.000 | 91.6289  |
| 2            |         | 14.475   | 13123.521  | 964939.063   | 8.3711   |
| <b>Total</b> |         |          | 239113.583 | 11527061.063 | 100.0000 |

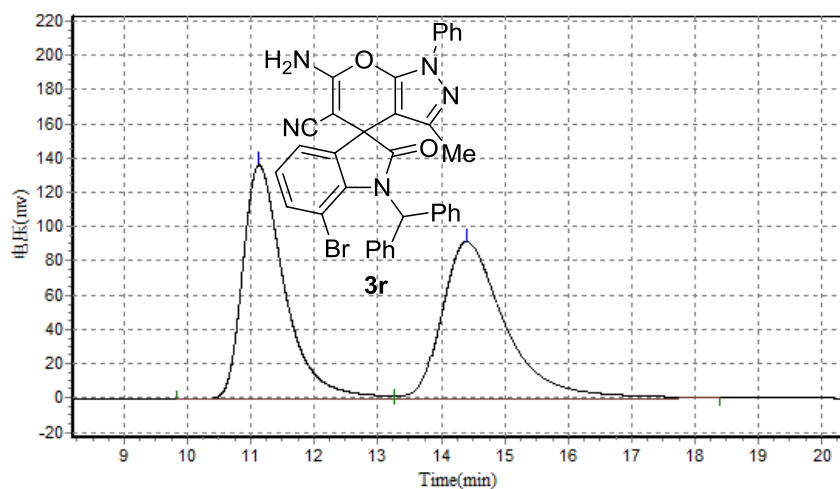

### Results

| Peak No.     | Peak ID | Ret Time | Height     | Area         | Conc.    |
|--------------|---------|----------|------------|--------------|----------|
| 1            |         | 11.140   | 136503.734 | 6226538.000  | 49.8223  |
| 2            |         | 14.402   | 91559.969  | 6270948.500  | 50.1777  |
| <b>Total</b> |         |          | 228063.703 | 12497486.500 | 100.0000 |

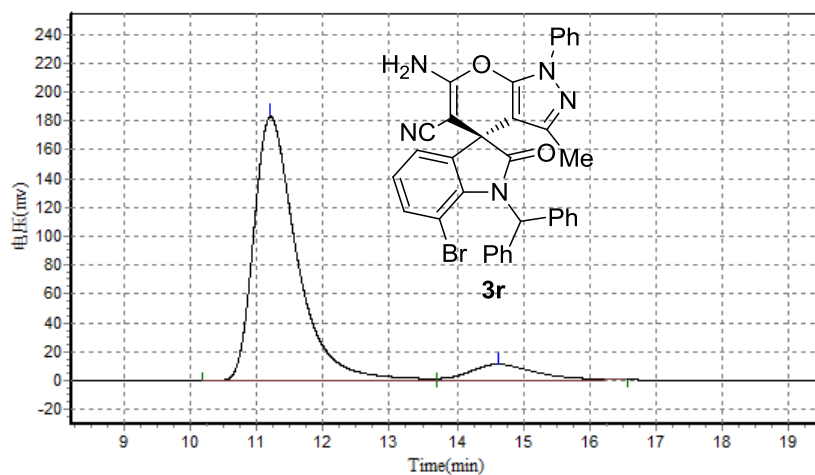

### Results

| Peak No.     | Peak ID | Ret Time | Height     | Area        | Conc.    |
|--------------|---------|----------|------------|-------------|----------|
| 1            |         | 11.208   | 182974.656 | 8224511.500 | 91.6623  |
| 2            |         | 14.623   | 10868.662  | 748108.938  | 8.3377   |
| <b>Total</b> |         |          | 193843.318 | 8972620.438 | 100.0000 |

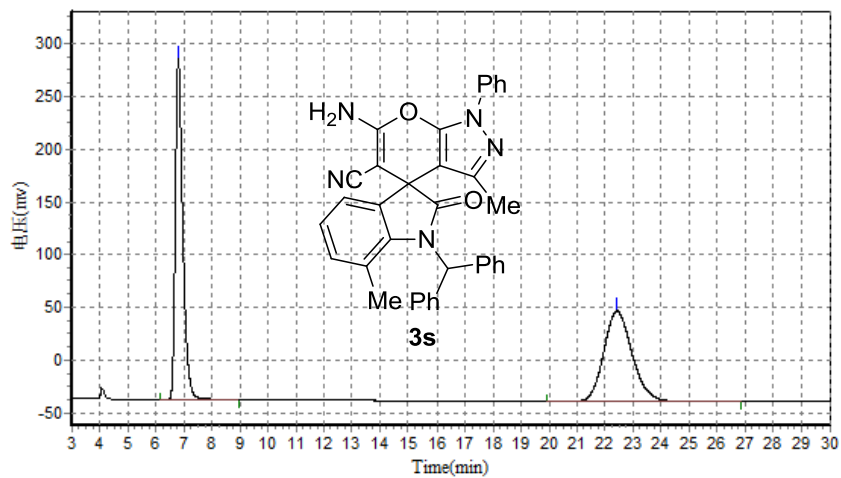

### Results

| Peak No.     | Peak ID | Ret Time | Height     | Area         | Conc.    |
|--------------|---------|----------|------------|--------------|----------|
| 1            |         | 6.793    | 322834.906 | 5991547.500  | 50.1082  |
| 2            |         | 22.422   | 85467.125  | 5965668.500  | 49.8918  |
| <b>Total</b> |         |          | 408302.031 | 11957216.000 | 100.0000 |

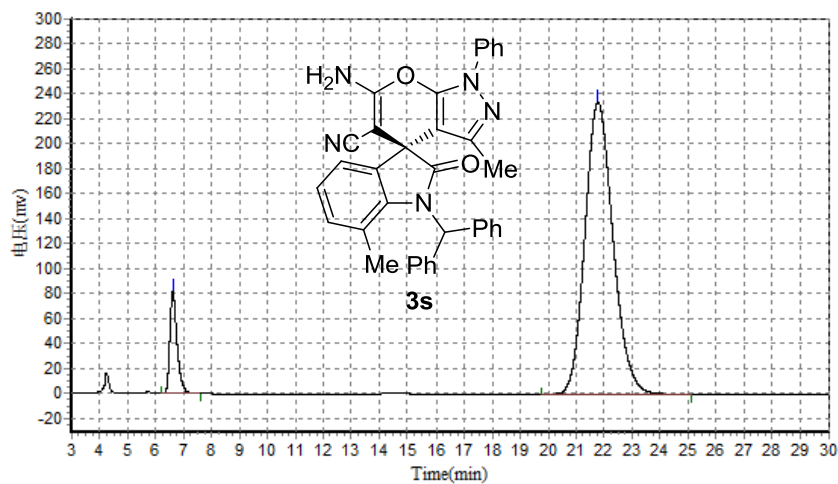

### Results

| Peak No.     | Peak ID | Ret Time | Height     | Area         | Conc.    |
|--------------|---------|----------|------------|--------------|----------|
| 1            |         | 6.610    | 81637.617  | 1459728.750  | 8.2108   |
| 2            |         | 21.780   | 234204.188 | 16318475.000 | 91.7892  |
| <b>Total</b> |         |          | 315841.805 | 17778203.750 | 100.0000 |

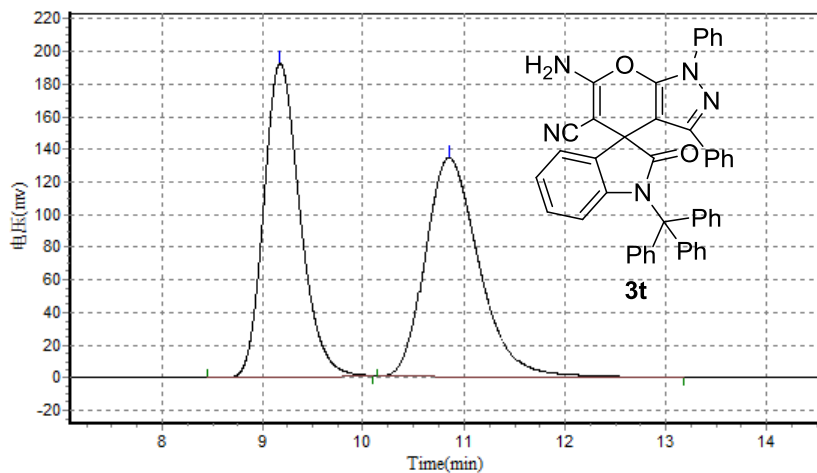

### Results

| Peak No.     | Peak ID | Ret Time | Height     | Area        | Conc.    |
|--------------|---------|----------|------------|-------------|----------|
| 1            |         | 9.178    | 192081.984 | 4783971.500 | 49.4046  |
| 2            |         | 10.845   | 133789.375 | 4899280.000 | 50.5954  |
| <b>Total</b> |         |          | 325871.359 | 9683251.500 | 100.0000 |

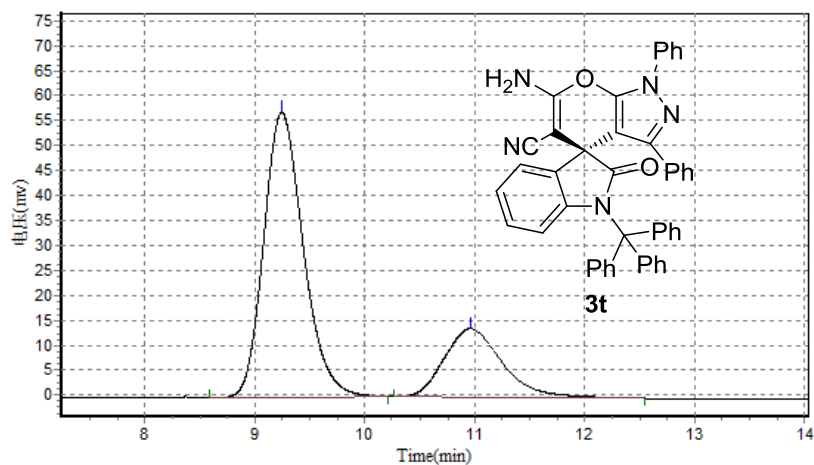

### Results

| Peak No.     | Peak ID | Ret Time | Height    | Area        | Conc.    |
|--------------|---------|----------|-----------|-------------|----------|
| 1            |         | 9.248    | 56979.449 | 1428357.750 | 73.6783  |
| 2            |         | 10.957   | 13742.665 | 510283.406  | 26.3217  |
| <b>Total</b> |         |          | 70722.114 | 1938641.156 | 100.0000 |



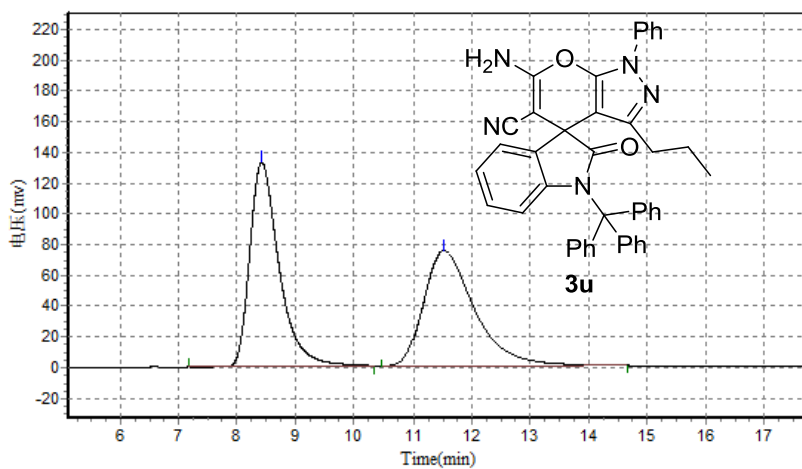

**Results**

| Peak No.     | Peak ID | Ret Time | Height     | Area        | Conc.    |
|--------------|---------|----------|------------|-------------|----------|
| 1            |         | 8.425    | 132598.563 | 4613695.500 | 50.4017  |
| 2            |         | 11.527   | 75094.297  | 4540144.000 | 49.5982  |
| <b>Total</b> |         |          | 207692.859 | 9153839.500 | 100.0000 |

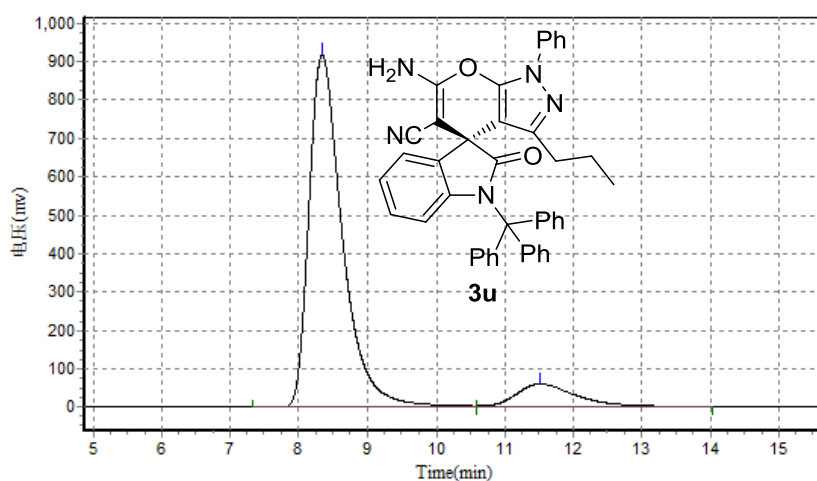

**Results**

| Peak No.     | Peak ID | Ret Time | Height     | Area         | Conc.    |
|--------------|---------|----------|------------|--------------|----------|
| 1            |         | 8.343    | 916348.188 | 31153746.000 | 89.5444  |
| 2            |         | 11.520   | 59677.898  | 3637629.750  | 10.4556  |
| <b>Total</b> |         |          | 976026.086 | 34791375.750 | 100.0000 |

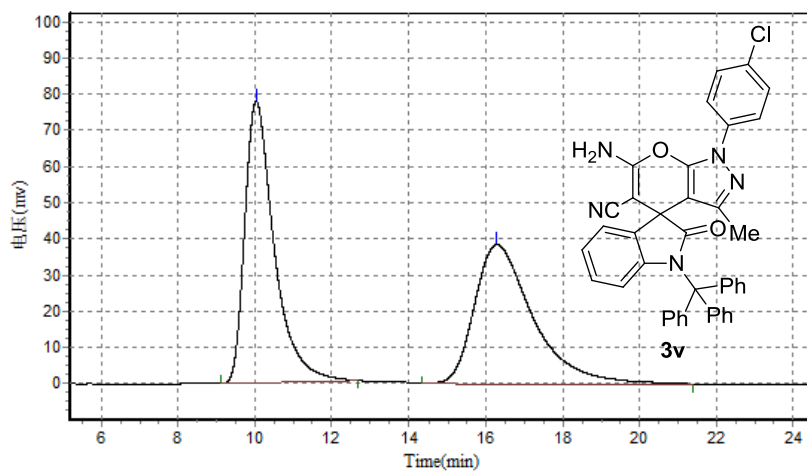

**Results**

| Peak No.     | Peak ID | Ret Time | Height     | Area        | Conc.    |
|--------------|---------|----------|------------|-------------|----------|
| 1            |         | 10.042   | 77886.844  | 4141922.750 | 50.7817  |
| 2            |         | 16.277   | 38284.449  | 4014401.750 | 49.2183  |
| <b>Total</b> |         |          | 116171.293 | 8156324.500 | 100.0000 |

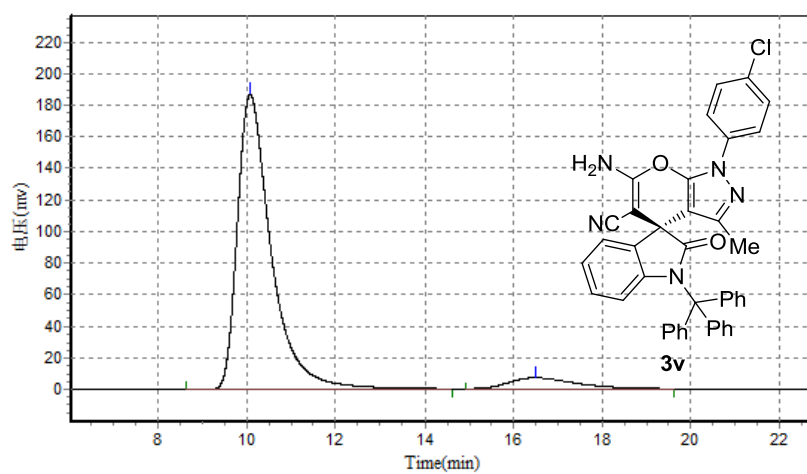

**Results**

| Peak No.     | Peak ID | Ret Time | Height     | Area         | Conc.    |
|--------------|---------|----------|------------|--------------|----------|
| 1            |         | 10.083   | 186771.609 | 9887684.000  | 93.1662  |
| 2            |         | 16.512   | 6950.479   | 725269.125   | 6.8338   |
| <b>Total</b> |         |          | 193722.089 | 10612953.125 | 100.0000 |

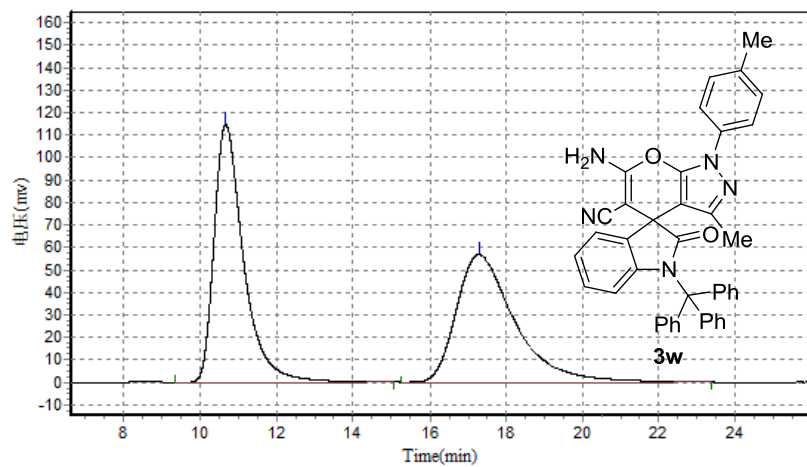

### Results

| Peak No.     | Peak ID | Ret Time | Height     | Area         | Conc.    |
|--------------|---------|----------|------------|--------------|----------|
| 1            |         | 10.673   | 114884.930 | 6166986.000  | 50.4627  |
| 2            |         | 17.280   | 56677.547  | 6053885.000  | 49.5373  |
| <b>Total</b> |         |          | 171562.477 | 12220871.000 | 100.0000 |

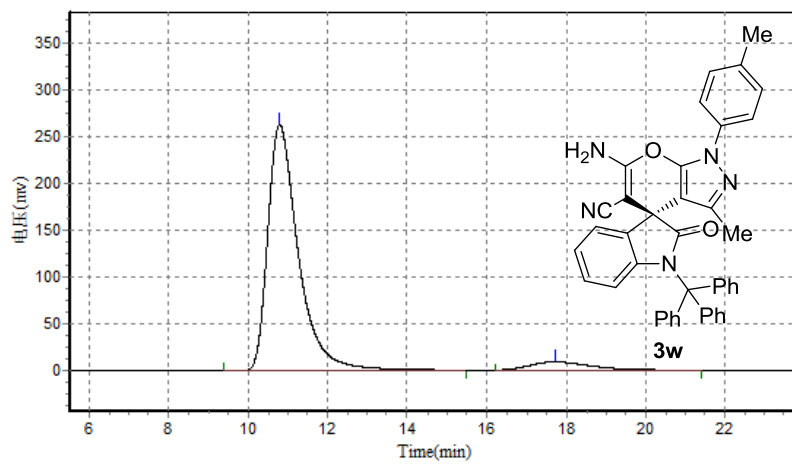

### Results

| Peak No.     | Peak ID | Ret Time | Height     | Area         | Conc.    |
|--------------|---------|----------|------------|--------------|----------|
| 1            |         | 10.802   | 262995.219 | 14043461.000 | 93.8016  |
| 2            |         | 17.703   | 8730.875   | 927987.375   | 6.1984   |
| <b>Total</b> |         |          | 271726.094 | 14971448.375 | 100.0000 |

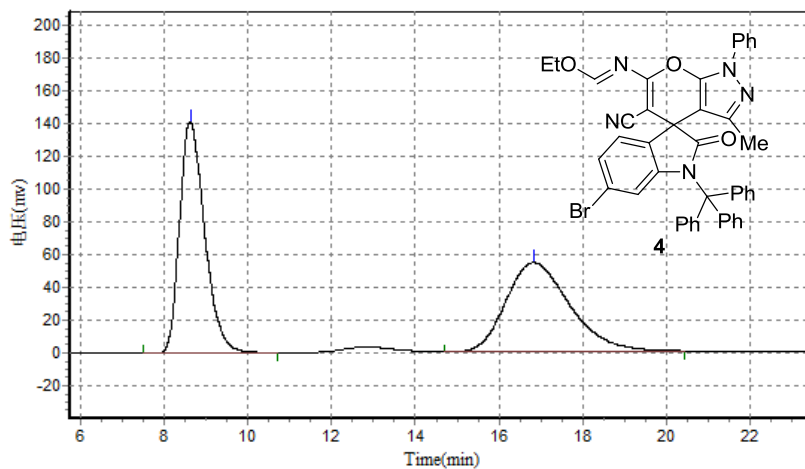

### Results

| Peak No.     | Peak ID | Ret Time | Height     | Area         | Conc.    |
|--------------|---------|----------|------------|--------------|----------|
| 1            |         | 8.625    | 141019.484 | 5889653.000  | 50.6711  |
| 2            |         | 16.817   | 54140.922  | 5733649.000  | 49.3289  |
| <b>Total</b> |         |          | 195160.406 | 11623302.000 | 100.0000 |

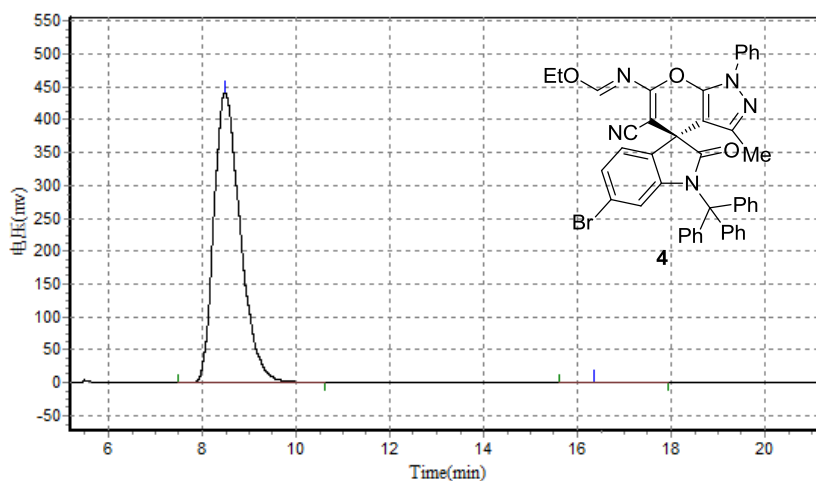

### Results

| Peak No.     | Peak ID | Ret Time | Height     | Area         | Conc.    |
|--------------|---------|----------|------------|--------------|----------|
| 1            |         | 8.487    | 440001.500 | 17245668.000 | 99.9478  |
| 2            |         | 16.360   | 131.000    | 8999.499     | 0.0522   |
| <b>Total</b> |         |          | 440132.500 | 17254667.499 | 100.0000 |

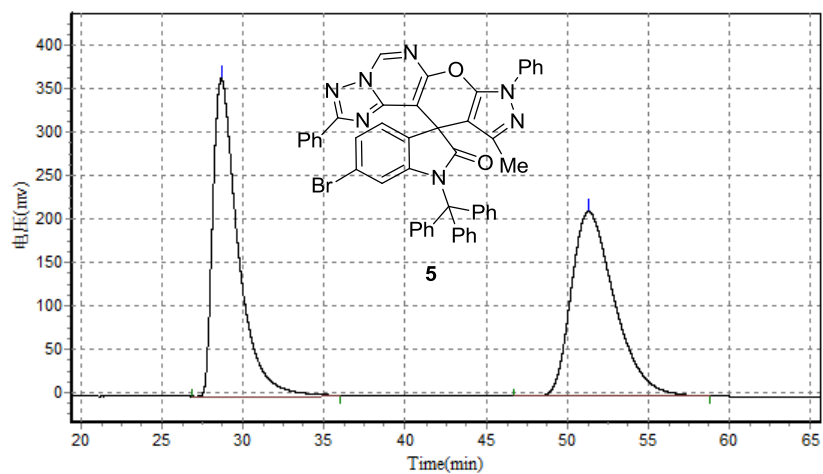

### Results

| Peak No.     | Peak ID | Ret Time | Height     | Area         | Conc.    |
|--------------|---------|----------|------------|--------------|----------|
| 1            |         | 28.662   | 365716.125 | 39499360.000 | 49.9359  |
| 2            |         | 51.330   | 212505.734 | 39600808.000 | 50.0641  |
| <b>Total</b> |         |          | 578221.859 | 79100168.000 | 100.0000 |

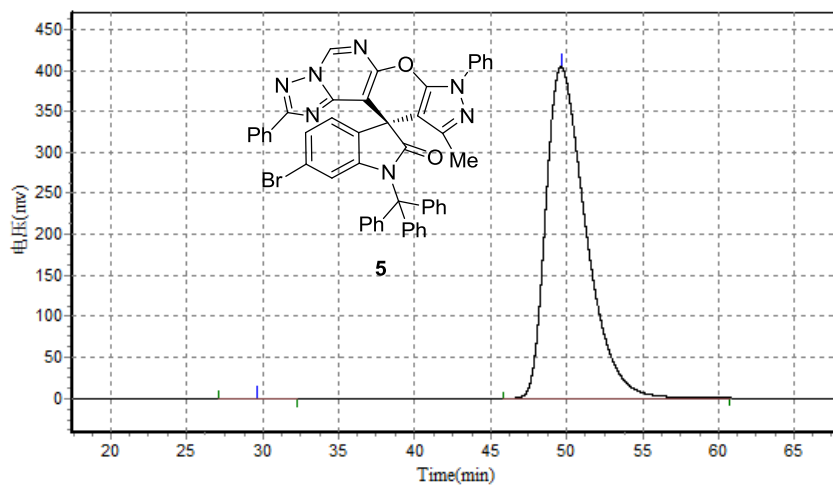

### Results

| Peak No.     | Peak ID | Ret Time | Height     | Area         | Conc.    |
|--------------|---------|----------|------------|--------------|----------|
| 1            |         | 29.613   | 495.914    | 55803.703    | 0.0751   |
| 2            |         | 49.615   | 403985.375 | 74213592.000 | 99.9249  |
| <b>Total</b> |         |          | 404481.289 | 74269395.703 | 100.0000 |

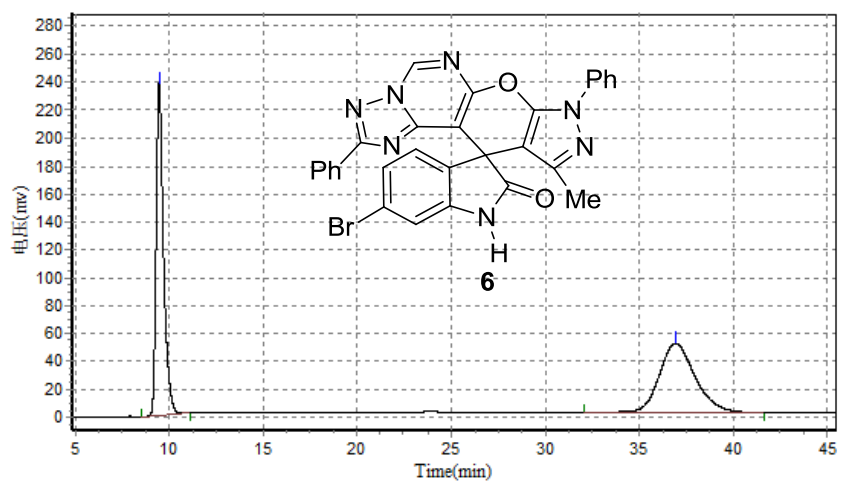

### Results

| Peak No.     | Peak ID | Ret Time | Height     | Area         | Conc.    |
|--------------|---------|----------|------------|--------------|----------|
| 1            |         | 9.453    | 237734.250 | 6489347.500  | 49.6040  |
| 2            |         | 36.952   | 49661.109  | 6592947.500  | 50.3960  |
| <b>Total</b> |         |          | 287395.359 | 13082295.000 | 100.0000 |

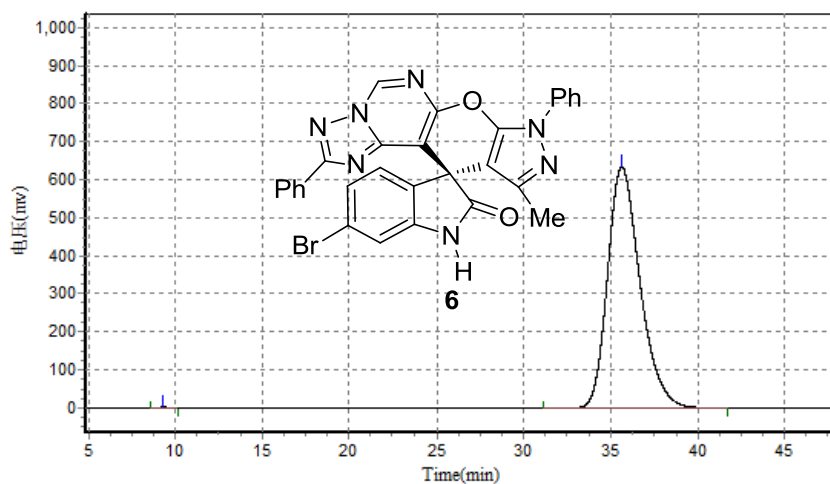

### Results

| Peak No.     | Peak ID | Ret Time | Height     | Area         | Conc.    |
|--------------|---------|----------|------------|--------------|----------|
| 1            |         | 9.310    | 2273.719   | 55934.598    | 0.0680   |
| 2            |         | 35.627   | 634383.875 | 82229544.000 | 99.9320  |
| <b>Total</b> |         |          | 636657.594 | 82285478.598 | 100.0000 |

## 8. X-ray Structure and Crystal Data for Compound 4

The crystal data of **4** have been deposited in CCDC with number 1468155.

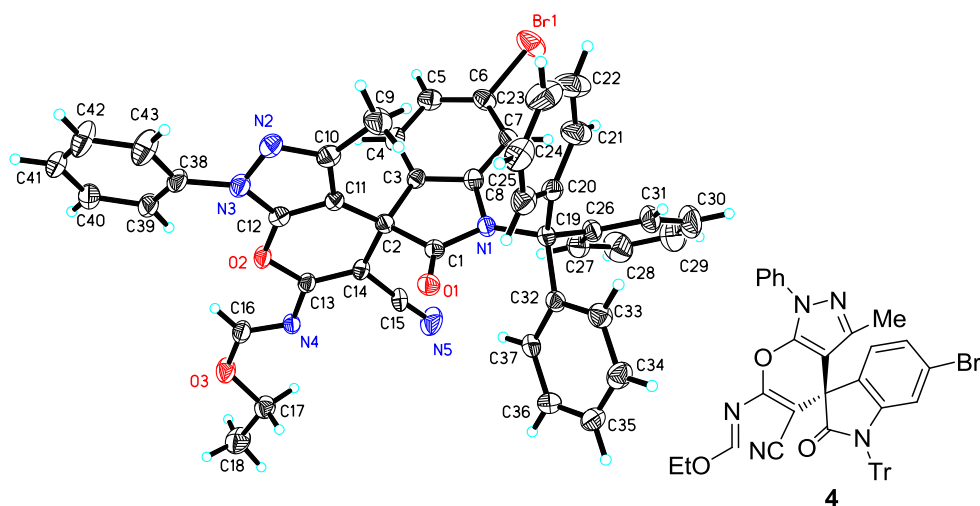

Table 1. Crystal data and structure refinement for **4**.

|                                 |                                                                                         |
|---------------------------------|-----------------------------------------------------------------------------------------|
| Identification code             | <b>4</b>                                                                                |
| Empirical formula               | $C_{43}H_{32}BrN_5O_3$                                                                  |
| Formula weight                  | 746.64                                                                                  |
| Temperature                     | 296.15 K                                                                                |
| Wavelength                      | 0.71073 Å                                                                               |
| Crystal system                  | Monoclinic                                                                              |
| Space group                     | P 1 21 1                                                                                |
| Unit cell dimensions            | $a = 13.218(2)$ Å = 90 °<br>$b = 16.657(3)$ Å = 92.527(3) °<br>$c = 16.344(3)$ Å = 90 ° |
| Volume                          | $3595.2(10)$ Å <sup>3</sup>                                                             |
| Z                               | 4                                                                                       |
| Density (calculated)            | 1.379 Mg/m <sup>3</sup>                                                                 |
| Absorption coefficient          | 1.192 mm <sup>-1</sup>                                                                  |
| F(000)                          | 1536                                                                                    |
| Crystal size                    | 0.15 x 0.12 x 0.08 mm <sup>3</sup>                                                      |
| Theta range for data collection | 1.542 to 27.705 °                                                                       |

|                                   |                                             |
|-----------------------------------|---------------------------------------------|
| Index ranges                      | -17<=h<=17, -21<=k<=18, -20<=l<=21          |
| Reflections collected             | 29858                                       |
| Independent reflections           | 15941 [R(int) = 0.0554]                     |
| Completeness to theta = 26.000 °  | 100.0 %                                     |
| Absorption correction             | Semi-empirical from equivalents             |
| Max. and min. transmission        | 0.7456 and 0.6136                           |
| Refinement method                 | Full-matrix least-squares on F <sup>2</sup> |
| Data / restraints / parameters    | 15941 / 1 / 941                             |
| Goodness-of-fit on F <sup>2</sup> | 0.866                                       |
| Final R indices [I>2sigma(I)]     | R1 = 0.0474, wR2 = 0.0811                   |
| R indices (all data)              | R1 = 0.1338, wR2 = 0.1057                   |
| Absolute structure parameter      | -0.003(6)                                   |
| Extinction coefficient            | n/a                                         |
| Largest diff. peak and hole       | 0.287 and -0.263 e.Å <sup>-3</sup>          |
